# Supplementary material for: Long-term risk of death after Tuberculosis diagnosis and treatment in Brazil: a nationwide longitudinal study using linked routine data between 2004 and 2018.
Source: Research Square preprint supplement (doi:10.21203/rs.3.rs-7133626/v1), 2025-07-28
Supplement: Supplementary file 1 [file 8bd3bdea8a9503f1aec4cfeb.docx]

Table of Contents

[Supplementary Table 1. Missing data characteristics. 3](#_Toc203467578)

[Supplementary Table 2: Baseline characteristics of matched and unmatched persons in the diagnosed and treated cohorts. 4](#_Toc203467579)

[Supplementary Table 3. Estimated risk of death by cause-specific comparing diagnosed Tuberculosis cases compared to non-exposed controls. 5](#_Toc203467580)

[Supplementary Table 4. Estimated risk of death by cause-specific (defined by ICD-10 chapters) comparing treated Tuberculosis cases compared to non-exposed controls. 9](#_Toc203467581)

[Supplementary Table 5. Estimated risk of death by cause-specific (defined by ICD-10 chapters) comparing household Tuberculosis contacts compared to non-exposed controls. 13](#_Toc203467582)

[Supplementary Table 6. Estimated risk of death by cause-specific (defined by ICD-10 blocks) comparing diagnosed Tuberculosis cases compared to non-exposed controls. 17](#_Toc203467583)

[Supplementary Table 7. Estimated risk of death by cause-specific (defined by ICD-10 blocks) comparing treated Tuberculosis cases compared to non-exposed controls. 20](#_Toc203467584)

[Supplementary Table 8. Estimated risk of death by cause-specific (defined by ICD-10 blocks) comparing household Tuberculosis contacts compared to non-exposed controls. 23](#_Toc203467585)

[Supplementary Table 9. Estimated risk of death of natural causes (excluding external causes, TB and HIV deaths) comparing diagnosed Tuberculosis cases compared to non-exposed controls by subgroup. 27](#_Toc203467586)

[Supplementary Table 10. Estimated risk of death of natural causes (excluding external causes, TB and HIV deaths) comparing treated Tuberculosis cases compared to non-exposed controls by subgroup. 34](#_Toc203467587)

[Supplementary Table 11. Estimated risk of death by cause-specific (defined by ICD-10 chapters) comparing diagnosed Tuberculosis cases compared to non-exposed controls in Females. 41](#_Toc203467588)

[Supplementary Table 12. Estimated risk of death by cause-specific (defined by ICD-10 chapters) comparing diagnosed Tuberculosis cases compared to non-exposed controls in Males. 45](#_Toc203467589)

[Supplementary Table 13. Estimated risk of death by cause-specific (defined by ICD-10 chapters) comparing treated Tuberculosis cases compared to non-exposed controls in Females. 49](#_Toc203467590)

[Supplementary Table 14. Estimated risk of death by cause-specific (defined by ICD-10 chapters) comparing treated Tuberculosis cases compared to non-exposed controls in Males. 53](#_Toc203467591)

[Supplementary Figure 1. Cumulative incidence curve of all-cause mortality in the diagnosed tuberculosis cases and the unexposed control group. Shaded areas indicate the 95% confidence intervals. 58](#_Toc203467592)

[Supplementary Figure 2. Cumulative incidence curve of all-cause mortality in the treated tuberculosis cases and the unexposed control group. Shaded areas indicate the 95% confidence intervals. 59](#_Toc203467593)

[Supplementary Figure 3. Cumulative incidence curve of all-cause mortality in the household tuberculosis case contacts and the unexposed control group. Shaded areas indicate the 95% confidence intervals. 60](#_Toc203467594)

# Supplementary Table 1. Missing data characteristics.

| **Characteristic** | **Cases with missing  N = 41,210** | **Cases without missing  N = 209,598** |
| --- | --- | --- |
| **Age at baseline** | 25 (17 - 38) | 26 (16 - 40) |
| **Sex** |  |  |
| Female | 14474 (35.1) | 76252 (36.4) |
| **Race/Ethnicity** |  |  |
| White | 7512 (27.6) | 55591 (26.5) |
| Black | 3299 (12.1) | 26257 (12.5) |
| Mixed | 16111 (59.1) | 124472 (59.4) |
| Asian | 86 (0.3) | 616 (0.3) |
| Indigenous | 251 (0.9) | 2662 (1.3) |
| Missing | 13951 |  |
| **Geographic region** |  |  |
| North | 4313 (10.5) | 24596 (11.7) |
| Northeast | 14281 (34.7) | 71265 (34.0) |
| Southeast | 15943 (38.8) | 81060 (38.7) |
| South | 4908 (11.9) | 23373 (11.2) |
| Central-west | 1663 (4.0) | 9304 (4.4) |
| Missing | 102 |  |
| **Water system** |  |  |
| Public system | 25129 (79.3) | 159284 (76) |
| Water well | 4465 (14.1) | 33969 (16.2) |
| Other | 2109 (6.7) | 16345 (7.8) |
| Missing | 9507 |  |
| **Location of household** |  |  |
| Urban | 30310 (87.2) | 179398 (85.6) |
| Rural | 4440 (12.8) | 30200 (14.4) |
| Missing | 6460 |  |
| **Overcrowd (>2)** | 4893 (15.4) | 34468 (16.4) |
| **Diabetes** | 2004 (4.9) | 11389 (5.4) |
| **HIV** | 3825 (9.3) | 17055 (8.1) |
| **Material of household** |  |  |
| Masonry/brick | 24845 (78.4) | 158766 (75.7) |
| Coated Taipa | 614 (1.9) | 4889 (2.3) |
| Uncoated Taipa | 519 (1.6) | 4731 (2.3) |
| Wood | 4022(12.7) | 29384 (14.0) |
| Other | 1705 (5.4) | 11828 (5.6) |
| Missing | 9505 |  |
| **Tuberculosis classification** |  |  |
| Pulmonary | 34,608 (84%) | 178,217 (85%) |
| Extrapulmonary | 5373 (13.0) | 25587 (12.2) |
| Pulmonary+Extrapulmonary | 1206 (2.9) | 5720 (2.7) |
| Missing | 23 (0.1) | 74 (0.1) |

# Supplementary Table 2: Baseline characteristics of matched and unmatched persons in the diagnosed and treated cohorts.

|  | **Diagnosed** | | **Treated** | |
| --- | --- | --- | --- | --- |
| **Characteristic** | **Matched N = 185,921** | **Unmatched N = 23,677** | **Matched  N = 111,690** | **Unmatched  N = 14,118** |
| **Age at baseline** | 25 (15, 39) | 36 (24, 51) | 25 (15, 39) | 36 (23, 50) |
| **Sex** |  |  |  |  |
| Female | 68,470 (36.8%) | 7,781 (32.9%) | 42,829 (38.3%) | 4,853 (34.4%) |
| Male | 117,451 (63.2%) | 15,896 (67.1%) | 69,042 (61.7%) | 9,265 (65.6%) |
| **Race/Ethnicity** |  |  |  |  |
| White | 49,599 (26.7%) | 5,992 (25.3%) | 28,695 (25.7%) | 3,499 (24.8%) |
| Black | 21,183 (11.4%) | 5,075 (21.4%) | 12,116 (10.8%) | 2,975 (21.1%) |
| Mixed | 113,311 (60.9%) | 11,160 (47.1%) | 69,769 (62.4%) | 6,652 (47.1%) |
| Asian | 264 (0.1%) | 352 (1.5%) | 156 (0.1%) | 212 (1.5%) |
| Indigenous | 1,564 (0.8%) | 1,098 (4.6%) | 1,135 (1.0%) | 780 (5.5%) |
| **Geographic region** |  |  |  |  |
| North | 21,560 (11.6%) | 3,036 (12.8%) | 14,525 (13.0%) | 1,943 (13.8%) |
| Northeast | 61,861 (33.3%) | 9,404 (39.7%) | 39,603 (35.4%) | 5,797 (41.1%) |
| Southeast | 75,008 (40.3%) | 6,051 (25.6%) | 40,272 (36.0%) | 3,136 (22.2%) |
| South | 19,828 (10.7%) | 3,546 (15.0%) | 12,619 (11.3%) | 2,178 (15.4%) |
| Central west | 7,664 (4.1%) | 1,640 (6.9%) | 4,852 (4.3%) | 1,064 (7.5%) |
| **Education Level** |  |  |  |  |
| No school | 24,436 (13.1%) | 6,416 (27.1%) | 14,806 (13.2%) | 3,726 (26.4%) |
| Nursery | 1,503 (0.8%) | 879 (3.7%) | 951 (0.9%) | 519 (3.7%) |
| Infant School | 1,720 (0.9%) | 401 (1.7%) | 1,033 (0.9%) | 257 (1.8%) |
| Elementary school | 70,454 (37.9%) | 8,271 (34.9%) | 41,865 (37.4%) | 4,872 (34.5%) |
| Middle school | 65,170 (35.1%) | 5,201 (22.0%) | 38,951 (34.8%) | 3,201 (22.7%) |
| High School | 21,962 (11.8%) | 2,220 (9.4%) | 13,833 (12.4%) | 1,368 (9.7%) |
| Higher education | 676 (0.4%) | 289 (1.2%) | 432 (0.4%) | 175 (1.2%) |
| **Water system** |  |  |  |  |
| Public system | 147,196 (79.2%) | 12,088 (51.1%) | 87,296 (78.0%) | 7,079 (50.1%) |
| Water well | 26,747 (14.4%) | 7,222 (30.5%) | 17,381 (15.5%) | 4,474 (31.7%) |
| Other | 11,978 (6.4%) | 4,367 (18.4%) | 7,194 (6.4%) | 2,565 (18.2%) |
| **Location of household** |  |  |  |  |
| Urban | 164,096 (88.3%) | 15,302 (64.6%) | 97,496 (87.2%) | 8,856 (62.7%) |
| Rural | 21,825 (11.7%) | 8,375 (35.4%) | 14,375 (12.8%) | 5,262 (37.3%) |
| **Overcrowd (>2)** | 27,968 (15.0%) | 6,500 (27.5%) | 16,240 (14.5%) | 3,841 (27.1%) |
| **Diabetes** | 9,768 (5.3%) | 1,621 (6.8%) | 5,908 (5.3%) | 942 (6.7%) |
| **HIV** | 15,286 (8.2%) | 1,770 (7.5%) | 6,031 (5.4%) | 693 (4.9%) |
| **Material of household** |  |  |  |  |
| Masonry/brick | 147,173 (79.2%) | 11,593 (49.0%) | 87,086 (77.8%) | 6,819 (48.3%) |
| Coated Taipa | 2,929 (1.6%) | 1,960 (8.3%) | 1,926 (1.7%) | 1,248 (8.8%) |
| Uncoated Taipa | 2,930 (1.6%) | 1,801 (7.6%) | 2,003 (1.8%) | 1,091 (7.7%) |
| Wood | 24,712 (13.3%) | 4,672 (19.7%) | 15,674 (14.0%) | 2,721 (19.3%) |
| Other | 8,177 (4.4%) | 3,651 (15.4%) | 5,182 (4.6%) | 2,239 (15.9%) |
| **Year of CadUnico registration** |  |  |  |  |
| 2004-2006 | 105,041 (56.5%) | 11,165 (47.2%) | 63,757 (57.0%) | 6,880 (48.7%) |
| 2007-2009 | 41,269 (22.2%) | 6,568 (27.7%) | 25,078 (22.4%) | 4,011 (28.4%) |
| 2010-2012 | 23,137 (12.4%) | 3,425 (14.5%) | 13,764 (12.3%) | 1,959 (13.9%) |
| 2013-2015 | 11,417 (6.1%) | 1,827 (7.7%) | 7,138 (6.4%) | 1,016 (7.2%) |
| 2016-2018 | 5,057 (2.7%) | 692 (2.9%) | 2,134 (1.9%) | 252 (1.8%) |
| **Tuberculosis classification** |  |  |  |  |
| Pulmonary | 157,540 (84.7%) | 20,677 (87.3%) | 96,328 (86.1%) | 12,575 (89.1%) |
| Extrapulmonary | 23,134 (12.4%) | 2,453 (10.4%) | 13,110 (11.7%) | 1,320 (9.3%) |
| Pulmonary + Extrapulmonary | 5,178 (2.8%) | 542 (2.3%) | 2,433 (2.2%) | 223 (1.6%) |
| Missing | 69 (0.0%) | 5 (0.0%) |  |  |

# Supplementary Table 3. Estimated risk of death by cause-specific comparing diagnosed Tuberculosis cases compared to non-exposed controls.

|  | **Number of events** | | **Risk per 100,000** | |  |  |  |
| --- | --- | --- | --- | --- | --- | --- | --- |
| **Time - Days** | **Unexposed** | **Exposed** | **Unexposed** | **Exposed** | **Risk difference per 100,000 - 95% CI** | **Risk ratio - 95% CI** | **Incidence rate ratio - 95% CI** |
| **Cause: All-cause mortality** | | | | | | | |
| 30 | 87 | 5066 | 47.0 (37.3 to 57.3) | 2732.7 (2661.3 to 2808.5) | 2685.7 (2612.4 to 2762.0) | 58.10 (47.05 to 73.04) | 59.23 (47.98 to 74.43) |
| 90 | 165 | 2869 | 137.8 (121.6 to 153.6) | 4306.5 (4213.2 to 4397.9) | 4168.7 (4077.9 to 4264.0) | 31.25 (27.99 to 35.57) | 18.03 (15.59 to 21.18) |
| 180 | 210 | 1939 | 256.9 (235.7 to 278.7) | 5403.9 (5296.5 to 5505.8) | 5146.9 (5036.2 to 5252.4) | 21.03 (19.34 to 22.91) | 9.69 (8.51 to 11.35) |
| 365 | 464 | 2293 | 534.9 (503.3 to 568.1) | 6773.4 (6645.3 to 6888.8) | 6238.5 (6114.1 to 6356.2) | 12.66 (11.87 to 13.45) | 5.24 (4.77 to 5.79) |
| 730 | 768 | 2988 | 1045.9 (997.1 to 1091.3) | 8754.2 (8611.8 to 8892.5) | 7708.3 (7563.5 to 7858.3) | 8.37 (8.01 to 8.80) | 4.19 (3.89 to 4.53) |
| 1095 | 737 | 2015 | 1612.4 (1551.3 to 1673.8) | 10303.4 (10149.7 to 10452.0) | 8691.0 (8530.8 to 8853.8) | 6.39 (6.15 to 6.66) | 2.98 (2.75 to 3.24) |
| 1460 | 672 | 1652 | 2216.2 (2135.2 to 2295.2) | 11781.0 (11628.9 to 11953.1) | 9564.8 (9388.0 to 9733.6) | 5.32 (5.10 to 5.52) | 2.70 (2.49 to 2.96) |
| 1825 | 564 | 1369 | 2809.3 (2715.1 to 2902.0) | 13214.7 (13053.9 to 13399.4) | 10405.4 (10218.2 to 10618.0) | 4.70 (4.55 to 4.88) | 2.69 (2.45 to 3.00) |
| 2190 | 425 | 1076 | 3346.8 (3235.1 to 3455.2) | 14566.4 (14374.9 to 14764.9) | 11219.5 (11014.3 to 11438.2) | 4.35 (4.22 to 4.51) | 2.84 (2.55 to 3.17) |
| 2555 | 357 | 851 | 3901.2 (3781.6 to 4034.6) | 15876.5 (15667.3 to 16107.0) | 11975.3 (11750.5 to 12214.9) | 4.07 (3.94 to 4.21) | 2.70 (2.36 to 3.03) |
| 2920 | 281 | 590 | 4452.2 (4310.4 to 4598.7) | 17021.8 (16795.9 to 17252.2) | 12569.6 (12305.6 to 12820.8) | 3.82 (3.70 to 3.95) | 2.39 (2.10 to 2.77) |
| 3285 | 221 | 512 | 5022.9 (4871.1 to 5200.8) | 18325.8 (18076.2 to 18568.1) | 13302.9 (13000.8 to 13589.4) | 3.65 (3.53 to 3.76) | 2.66 (2.28 to 3.07) |
| 3650 | 173 | 305 | 5628.5 (5448.7 to 5837.3) | 19393.4 (19103.1 to 19668.8) | 13764.8 (13432.6 to 14065.7) | 3.45 (3.32 to 3.57) | 2.04 (1.70 to 2.47) |
| 4015 | 107 | 212 | 6200.7 (5991.0 to 6407.9) | 20524.7 (20194.4 to 20838.3) | 14324.0 (13961.1 to 14715.0) | 3.31 (3.19 to 3.44) | 2.31 (1.84 to 2.98) |
| 4380 | 61 | 118 | 6814.6 (6566.6 to 7098.8) | 21693.1 (21322.8 to 22056.1) | 14878.5 (14443.6 to 15344.1) | 3.18 (3.06 to 3.32) | 2.28 (1.70 to 3.01) |
| 4745 | 26 | 40 | 7491.7 (7102.3 to 7895.7) | 22727.4 (22209.8 to 23247.2) | 15235.7 (14561.0 to 15889.9) | 3.03 (2.86 to 3.21) | 1.83 (1.16 to 3.15) |
| 5110 | 7 | 5 | 8041.5 (7463.7 to 8583.2) | 23209.3 (22543.3 to 23976.3) | 15167.8 (14343.2 to 16015.5) | 2.89 (2.69 to 3.11) | *** |
| **Cause: Natural - excluding (HIV/TB and external causes)** | | | | | | | |
| 30 | 54 | 1524 | 29.2 (22.2 to 37.3) | 822.4 (782.8 to 860.9) | 793.2 (753.7 to 832.9) | 28.18 (21.68 to 37.04) | 28.70 (22.06 to 37.73) |
| 90 | 116 | 1119 | 93.0 (80.4 to 106.1) | 1436.3 (1386.8 to 1488.1) | 1343.3 (1291.5 to 1394.4) | 15.45 (13.35 to 17.86) | 10.00 (8.27 to 12.24) |
| 180 | 166 | 842 | 187.2 (168.8 to 205.4) | 1912.9 (1847.8 to 1974.1) | 1725.7 (1660.8 to 1789.2) | 10.22 (9.24 to 11.33) | 5.32 (4.61 to 6.45) |
| 365 | 337 | 1151 | 389.2 (360.5 to 418.5) | 2600.9 (2526.9 to 2667.0) | 2211.7 (2139.2 to 2286.0) | 6.68 (6.20 to 7.26) | 3.62 (3.25 to 4.06) |
| 730 | 565 | 1692 | 765.6 (721.7 to 803.1) | 3724.7 (3637.7 to 3814.5) | 2959.2 (2861.1 to 3056.1) | 4.87 (4.61 to 5.16) | 3.22 (2.94 to 3.54) |
| 1095 | 558 | 1237 | 1194.6 (1142.0 to 1249.7) | 4676.7 (4571.1 to 4777.7) | 3482.1 (3369.3 to 3597.3) | 3.91 (3.73 to 4.12) | 2.42 (2.19 to 2.68) |
| 1460 | 515 | 1050 | 1658.2 (1586.3 to 1726.6) | 5615.9 (5502.2 to 5733.7) | 3957.7 (3816.7 to 4089.4) | 3.39 (3.24 to 3.54) | 2.24 (2.02 to 2.52) |
| 1825 | 435 | 903 | 2116.3 (2033.0 to 2197.4) | 6562.7 (6433.3 to 6699.4) | 4446.4 (4277.5 to 4602.6) | 3.10 (2.97 to 3.24) | 2.30 (2.06 to 2.60) |
| 2190 | 348 | 731 | 2556.2 (2456.2 to 2652.8) | 7479.2 (7332.0 to 7626.3) | 4923.0 (4740.6 to 5082.9) | 2.93 (2.81 to 3.05) | 2.35 (2.08 to 2.68) |
| 2555 | 270 | 587 | 2975.2 (2871.2 to 3085.9) | 8383.6 (8226.5 to 8538.4) | 5408.4 (5221.7 to 5585.2) | 2.82 (2.71 to 2.93) | 2.46 (2.12 to 2.84) |
| 2920 | 213 | 405 | 3392.7 (3271.1 to 3514.8) | 9170.9 (8995.0 to 9338.6) | 5778.2 (5572.7 to 5977.1) | 2.70 (2.60 to 2.82) | 2.17 (1.87 to 2.55) |
| 3285 | 179 | 372 | 3853.5 (3717.2 to 3998.4) | 10121.6 (9919.4 to 10339.9) | 6268.1 (6019.2 to 6517.4) | 2.63 (2.52 to 2.74) | 2.39 (2.02 to 2.79) |
| 3650 | 136 | 234 | 4327.3 (4166.6 to 4484.2) | 10945.4 (10719.2 to 11176.8) | 6618.1 (6344.0 to 6888.7) | 2.53 (2.43 to 2.64) | 1.99 (1.64 to 2.45) |
| 4015 | 87 | 172 | 4788.7 (4601.5 to 4967.6) | 11863.0 (11615.3 to 12125.6) | 7074.3 (6776.7 to 7386.9) | 2.48 (2.37 to 2.59) | 2.30 (1.82 to 3.03) |
| 4380 | 53 | 98 | 5331.4 (5094.2 to 5576.5) | 12835.1 (12513.0 to 13150.4) | 7503.7 (7139.6 to 7885.1) | 2.41 (2.30 to 2.53) | 2.18 (1.56 to 2.97) |
| 4745 | 21 | 30 | 5901.9 (5553.1 to 6267.3) | 13599.3 (13177.5 to 14053.9) | 7697.4 (7101.4 to 8239.1) | 2.30 (2.15 to 2.45) | 1.70 (0.96 to 3.06) |
| 5110 | 7 | 4 | 6451.7 (5886.5 to 6975.2) | 13947.2 (13413.3 to 14553.7) | 7495.5 (6652.7 to 8257.8) | 2.16 (1.96 to 2.37) | *** |
| **Cause: Cancer** | | | | | | | |
| 30 | 9 | 245 | 4.9 (2.2 to 8.1) | 132.3 (117.2 to 149.3) | 127.4 (112.3 to 145.5) | 27.19 (15.65 to 60.28) | 27.69 (15.94 to 61.40) |
| 90 | 19 | 298 | 15.3 (9.8 to 20.2) | 295.9 (272.8 to 319.7) | 280.6 (257.1 to 306.3) | 19.30 (14.39 to 31.09) | 16.26 (11.08 to 29.63) |
| 180 | 24 | 250 | 29.0 (21.2 to 36.3) | 437.3 (409.0 to 467.2) | 408.4 (378.2 to 438.2) | 15.10 (12.04 to 20.75) | 10.93 (7.80 to 17.16) |
| 365 | 59 | 338 | 64.5 (53.4 to 76.1) | 639.2 (602.0 to 678.9) | 574.7 (536.8 to 613.9) | 9.91 (8.37 to 12.08) | 6.08 (4.70 to 8.16) |
| 730 | 112 | 378 | 138.8 (119.8 to 157.1) | 889.7 (849.7 to 940.1) | 751.0 (706.3 to 805.7) | 6.41 (5.62 to 7.56) | 3.63 (3.00 to 4.71) |
| 1095 | 95 | 233 | 212.1 (186.5 to 239.6) | 1069.1 (1021.2 to 1126.7) | 856.9 (798.0 to 921.5) | 5.04 (4.46 to 5.80) | 2.67 (2.10 to 3.42) |
| 1460 | 104 | 164 | 305.8 (279.8 to 336.2) | 1215.7 (1161.7 to 1274.3) | 909.9 (846.8 to 976.1) | 3.98 (3.55 to 4.43) | 1.73 (1.35 to 2.27) |
| 1825 | 83 | 169 | 393.5 (360.1 to 428.3) | 1392.8 (1328.0 to 1458.1) | 999.3 (927.9 to 1071.3) | 3.54 (3.19 to 3.93) | 2.26 (1.78 to 2.88) |
| 2190 | 62 | 120 | 472.6 (429.5 to 513.5) | 1542.6 (1474.1 to 1617.8) | 1070.0 (989.1 to 1149.9) | 3.26 (2.96 to 3.60) | 2.17 (1.62 to 3.03) |
| 2555 | 45 | 97 | 541.7 (492.2 to 587.5) | 1690.6 (1614.3 to 1772.5) | 1148.9 (1059.8 to 1237.6) | 3.12 (2.86 to 3.47) | 2.44 (1.73 to 3.43) |
| 2920 | 43 | 73 | 627.5 (575.2 to 677.1) | 1831.2 (1746.5 to 1917.7) | 1203.6 (1107.6 to 1299.7) | 2.92 (2.66 to 3.19) | 1.94 (1.38 to 2.92) |
| 3285 | 36 | 63 | 719.4 (651.7 to 780.2) | 1992.3 (1898.2 to 2080.9) | 1273.0 (1163.9 to 1377.3) | 2.77 (2.53 to 3.04) | 2.01 (1.36 to 3.02) |
| 3650 | 31 | 46 | 827.5 (756.0 to 895.6) | 2155.8 (2051.2 to 2259.9) | 1328.3 (1206.4 to 1446.6) | 2.61 (2.37 to 2.84) | 1.72 (1.07 to 2.81) |
| 4015 | 24 | 24 | 956.7 (874.0 to 1041.2) | 2285.0 (2176.2 to 2404.8) | 1328.3 (1197.5 to 1463.1) | 2.39 (2.17 to 2.64) | 1.17 (0.65 to 1.99) |
| 4380 | 13 | 22 | 1085.5 (976.0 to 1195.4) | 2496.7 (2348.2 to 2641.9) | 1411.2 (1227.7 to 1576.9) | 2.30 (2.05 to 2.58) | 1.99 (0.99 to 4.11) |
| 4745 | 6 | 5 | 1243.5 (1086.2 to 1424.0) | 2617.6 (2433.4 to 2792.6) | 1374.1 (1115.5 to 1607.8) | 2.11 (1.81 to 2.45) | *** |
| 5110 | 1 | 1 | 1292.2 (1116.2 to 1504.8) | 2694.4 (2452.9 to 2927.8) | 1402.2 (1088.6 to 1664.4) | 2.09 (1.75 to 2.44) | *** |
| **Cause: Cardiovascular** | | | | | | | |
| 30 | 13 | 189 | 7.0 (3.2 to 10.8) | 102.0 (87.7 to 117.1) | 95.0 (79.9 to 110.1) | 14.54 (8.93 to 28.66) | 14.79 (9.08 to 29.13) |
| 90 | 38 | 158 | 27.9 (20.2 to 35.3) | 188.7 (167.8 to 209.7) | 160.8 (137.9 to 181.6) | 6.76 (5.11 to 9.38) | 4.31 (3.12 to 6.25) |
| 180 | 53 | 146 | 58.0 (47.2 to 68.0) | 271.4 (246.1 to 296.4) | 213.4 (183.9 to 239.7) | 4.68 (3.84 to 5.84) | 2.89 (2.16 to 4.02) |
| 365 | 121 | 202 | 130.4 (113.1 to 148.1) | 391.9 (360.7 to 421.8) | 261.5 (225.2 to 295.9) | 3.00 (2.58 to 3.49) | 1.77 (1.41 to 2.27) |
| 730 | 175 | 315 | 247.1 (223.1 to 270.9) | 600.8 (560.3 to 639.1) | 353.8 (306.2 to 397.2) | 2.43 (2.16 to 2.76) | 1.94 (1.61 to 2.35) |
| 1095 | 205 | 263 | 404.7 (372.8 to 438.5) | 803.7 (755.1 to 845.6) | 399.0 (338.9 to 453.7) | 1.99 (1.79 to 2.20) | 1.40 (1.17 to 1.69) |
| 1460 | 166 | 259 | 553.9 (513.2 to 594.9) | 1036.0 (981.8 to 1084.1) | 482.2 (414.6 to 546.5) | 1.87 (1.71 to 2.05) | 1.72 (1.40 to 2.06) |
| 1825 | 148 | 194 | 709.2 (658.0 to 759.4) | 1240.6 (1177.8 to 1297.5) | 531.4 (455.0 to 605.7) | 1.75 (1.61 to 1.91) | 1.46 (1.20 to 1.79) |
| 2190 | 122 | 160 | 863.2 (806.8 to 920.0) | 1441.6 (1374.2 to 1503.0) | 578.4 (493.8 to 654.9) | 1.67 (1.54 to 1.80) | 1.47 (1.15 to 1.82) |
| 2555 | 100 | 122 | 1019.7 (960.8 to 1084.4) | 1631.1 (1554.8 to 1701.1) | 611.4 (525.5 to 691.6) | 1.60 (1.49 to 1.71) | 1.38 (1.07 to 1.78) |
| 2920 | 72 | 98 | 1159.9 (1097.7 to 1232.3) | 1821.9 (1739.1 to 1900.9) | 662.0 (555.8 to 757.0) | 1.57 (1.46 to 1.68) | 1.55 (1.16 to 2.14) |
| 3285 | 61 | 72 | 1319.2 (1243.8 to 1404.6) | 2009.4 (1919.5 to 2100.8) | 690.1 (569.0 to 810.2) | 1.52 (1.41 to 1.64) | 1.36 (0.96 to 1.92) |
| 3650 | 57 | 57 | 1518.3 (1427.6 to 1612.1) | 2210.4 (2103.5 to 2313.0) | 692.2 (563.8 to 826.2) | 1.46 (1.35 to 1.57) | 1.16 (0.81 to 1.71) |
| 4015 | 24 | 35 | 1638.2 (1536.3 to 1736.3) | 2392.8 (2272.9 to 2502.5) | 754.5 (607.3 to 895.3) | 1.46 (1.35 to 1.57) | 1.70 (1.03 to 2.95) |
| 4380 | 20 | 28 | 1832.4 (1701.2 to 1961.4) | 2676.5 (2527.8 to 2826.9) | 844.1 (658.1 to 1037.4) | 1.46 (1.34 to 1.60) | 1.65 (1.02 to 3.01) |
| 4745 | 7 | 5 | 2023.0 (1833.5 to 2234.9) | 2791.8 (2610.5 to 2975.7) | 768.8 (494.9 to 1038.0) | 1.38 (1.22 to 1.56) | *** |
| 5110 | 1 | 1 | 2102.5 (1870.7 to 2412.8) | 2902.2 (2673.3 to 3198.8) | 799.6 (404.6 to 1205.2) | 1.38 (1.17 to 1.62) | *** |
| **Cause: Endocrine** | | | | | | | |
| 30 | 3 | 85 | 1.6 (0.0 to 3.8) | 45.9 (36.7 to 56.1) | 44.3 (34.5 to 54.5) | *** | *** |
| 90 | 11 | 64 | 7.7 (3.8 to 12.1) | 81.0 (67.9 to 94.7) | 73.3 (59.8 to 88.1) | 10.56 (6.64 to 21.58) | 6.03 (3.46 to 14.74) |
| 180 | 12 | 46 | 14.5 (8.9 to 20.0) | 107.0 (91.8 to 122.9) | 92.6 (76.8 to 110.1) | 7.40 (5.21 to 12.10) | 4.02 (2.33 to 9.09) |
| 365 | 27 | 68 | 30.7 (22.6 to 39.0) | 147.8 (130.1 to 166.6) | 117.1 (97.2 to 137.6) | 4.82 (3.68 to 6.72) | 2.67 (1.78 to 4.19) |
| 730 | 56 | 103 | 68.0 (55.8 to 80.9) | 216.5 (195.2 to 238.9) | 148.5 (121.8 to 173.4) | 3.19 (2.58 to 3.99) | 1.98 (1.47 to 2.78) |
| 1095 | 35 | 90 | 94.9 (79.9 to 111.5) | 285.3 (259.9 to 311.7) | 190.4 (160.6 to 222.6) | 3.01 (2.46 to 3.65) | 2.80 (1.90 to 4.20) |
| 1460 | 41 | 80 | 132.1 (114.2 to 153.4) | 356.9 (325.7 to 387.3) | 224.7 (188.7 to 262.5) | 2.70 (2.26 to 3.21) | 2.15 (1.50 to 3.12) |
| 1825 | 29 | 60 | 162.6 (140.9 to 186.1) | 419.9 (385.3 to 457.2) | 257.2 (216.6 to 300.5) | 2.58 (2.22 to 3.03) | 2.30 (1.47 to 3.74) |
| 2190 | 26 | 66 | 195.3 (170.2 to 221.8) | 502.5 (461.4 to 541.4) | 307.2 (258.0 to 356.9) | 2.57 (2.20 to 3.03) | 2.84 (1.80 to 4.73) |
| 2555 | 21 | 45 | 227.9 (199.9 to 257.9) | 571.3 (525.7 to 615.3) | 343.4 (289.1 to 398.1) | 2.51 (2.15 to 2.95) | 2.42 (1.48 to 4.17) |
| 2920 | 9 | 30 | 245.2 (215.1 to 278.4) | 629.2 (579.5 to 679.5) | 384.0 (323.2 to 446.9) | 2.57 (2.20 to 3.02) | 3.80 (1.97 to 11.41) |
| 3285 | 9 | 36 | 268.5 (234.5 to 305.4) | 722.5 (666.8 to 781.8) | 454.0 (387.6 to 525.4) | 2.69 (2.32 to 3.18) | 4.59 (2.30 to 11.80) |
| 3650 | 8 | 21 | 296.3 (255.2 to 337.0) | 797.7 (727.9 to 862.4) | 501.3 (428.3 to 580.2) | 2.69 (2.30 to 3.20) | 3.04 (1.42 to 9.54) |
| 4015 | 3 | 15 | 312.0 (267.2 to 357.2) | 878.7 (802.4 to 956.5) | 566.7 (480.8 to 659.7) | 2.82 (2.41 to 3.39) | *** |
| 4380 | 4 | 5 | 357.6 (299.4 to 429.8) | 929.8 (841.0 to 1022.9) | 572.2 (463.2 to 679.9) | 2.60 (2.13 to 3.21) | *** |
| 4745 | 1 | 4 | 375.2 (311.5 to 456.0) | 1020.0 (900.7 to 1148.8) | 644.8 (506.3 to 792.3) | 2.72 (2.18 to 3.47) | *** |
| 5110 | 1 | 0 | 432.6 (323.8 to 588.2) | 1020.0 (900.7 to 1148.8) | 587.4 (396.5 to 760.4) | 2.36 (1.68 to 3.21) | *** |
| **Cause: Respiratory** | | | | | | | |
| 30 | 10 | 444 | 5.4 (2.2 to 9.2) | 239.5 (218.7 to 260.0) | 234.1 (213.1 to 257.0) | 44.30 (26.43 to 106.00) | 45.16 (26.95 to 108.00) |
| 90 | 9 | 187 | 10.3 (6.5 to 15.2) | 342.0 (315.8 to 365.8) | 331.7 (303.5 to 355.6) | 33.11 (22.21 to 53.95) | 21.54 (12.08 to 52.12) |
| 180 | 23 | 149 | 23.4 (15.9 to 31.8) | 426.4 (396.2 to 453.0) | 403.0 (370.6 to 431.3) | 18.19 (13.44 to 26.95) | 6.80 (4.51 to 11.73) |
| 365 | 34 | 219 | 43.8 (33.2 to 54.0) | 557.5 (521.8 to 590.2) | 513.6 (476.9 to 550.1) | 12.72 (10.21 to 16.93) | 6.83 (4.96 to 10.34) |
| 730 | 59 | 353 | 83.3 (70.2 to 98.7) | 792.0 (749.6 to 836.3) | 708.7 (663.7 to 754.7) | 9.51 (7.95 to 11.37) | 6.44 (4.99 to 8.38) |
| 1095 | 75 | 229 | 140.7 (121.3 to 159.0) | 967.8 (921.6 to 1014.7) | 827.1 (777.6 to 877.2) | 6.88 (5.99 to 8.03) | 3.33 (2.60 to 4.37) |
| 1460 | 58 | 215 | 193.2 (170.0 to 217.5) | 1159.3 (1110.4 to 1213.9) | 966.1 (909.5 to 1026.9) | 6.00 (5.29 to 6.83) | 4.08 (3.13 to 5.53) |
| 1825 | 52 | 194 | 248.0 (218.9 to 275.3) | 1362.2 (1303.2 to 1424.9) | 1114.2 (1050.7 to 1187.4) | 5.49 (4.90 to 6.28) | 4.14 (3.20 to 5.82) |
| 2190 | 44 | 130 | 303.8 (271.4 to 335.1) | 1524.6 (1459.5 to 1599.0) | 1220.8 (1150.5 to 1298.0) | 5.02 (4.52 to 5.64) | 3.31 (2.48 to 4.87) |
| 2555 | 30 | 112 | 350.1 (314.2 to 387.2) | 1697.5 (1625.6 to 1778.5) | 1347.4 (1267.0 to 1433.9) | 4.85 (4.33 to 5.42) | 4.22 (2.92 to 6.89) |
| 2920 | 25 | 79 | 399.2 (355.5 to 439.4) | 1852.1 (1771.1 to 1938.9) | 1452.8 (1367.6 to 1548.9) | 4.64 (4.13 to 5.23) | 3.60 (2.26 to 5.83) |
| 3285 | 19 | 74 | 448.8 (400.0 to 495.3) | 2037.8 (1948.8 to 2136.8) | 1589.0 (1487.7 to 1688.8) | 4.54 (4.06 to 5.13) | 4.47 (2.87 to 7.97) |
| 3650 | 12 | 43 | 490.3 (438.2 to 538.7) | 2184.1 (2086.0 to 2295.8) | 1693.8 (1577.8 to 1820.0) | 4.45 (3.99 to 5.04) | 4.15 (2.37 to 8.65) |
| 4015 | 8 | 43 | 534.6 (471.4 to 592.9) | 2413.2 (2300.6 to 2539.1) | 1878.5 (1741.2 to 2023.7) | 4.51 (4.03 to 5.15) | 6.26 (3.25 to 18.25) |
| 4380 | 6 | 16 | 597.6 (513.2 to 678.3) | 2569.1 (2430.0 to 2731.3) | 1971.6 (1810.1 to 2140.8) | 4.30 (3.77 to 4.98) | 3.14 (1.31 to 12.32) |
| 4745 | 4 | 6 | 743.0 (586.2 to 936.2) | 2755.0 (2572.7 to 2985.7) | 2011.9 (1742.7 to 2268.3) | 3.71 (2.93 to 4.68) | *** |
| 5110 | 1 | 1 | 806.4 (619.9 to 1031.9) | 2830.0 (2599.3 to 3096.0) | 2023.6 (1723.9 to 2367.3) | 3.51 (2.71 to 4.65) | *** |
| **Cause: External** | | | | | | | |
| 30 | 31 | 59 | 16.8 (11.4 to 22.2) | 31.9 (24.3 to 40.5) | 15.1 (5.9 to 24.6) | 1.90 (1.29 to 3.04) | 1.94 (1.31 to 3.10) |
| 90 | 45 | 72 | 41.5 (33.4 to 50.8) | 71.4 (58.3 to 83.3) | 29.9 (14.2 to 44.5) | 1.72 (1.29 to 2.27) | 1.66 (1.17 to 2.47) |
| 180 | 43 | 151 | 65.8 (55.4 to 77.7) | 157.0 (137.5 to 174.9) | 91.1 (69.7 to 112.0) | 2.38 (1.95 to 2.94) | 3.69 (2.67 to 5.23) |
| 365 | 117 | 286 | 135.9 (119.2 to 152.6) | 328.3 (299.8 to 355.7) | 192.4 (159.4 to 221.6) | 2.42 (2.10 to 2.80) | 2.59 (2.08 to 3.16) |
| 730 | 191 | 481 | 262.6 (239.6 to 285.7) | 648.2 (608.3 to 683.2) | 385.6 (339.2 to 426.2) | 2.47 (2.22 to 2.74) | 2.71 (2.31 to 3.21) |
| 1095 | 169 | 349 | 392.5 (363.9 to 425.2) | 915.8 (866.5 to 964.5) | 523.3 (463.4 to 578.2) | 2.33 (2.13 to 2.55) | 2.25 (1.85 to 2.72) |
| 1460 | 142 | 266 | 519.3 (487.3 to 559.2) | 1154.5 (1104.0 to 1213.8) | 635.2 (571.8 to 697.9) | 2.22 (2.04 to 2.39) | 2.06 (1.69 to 2.52) |
| 1825 | 115 | 226 | 639.7 (599.2 to 685.4) | 1391.4 (1332.9 to 1452.5) | 751.8 (681.7 to 829.4) | 2.18 (2.02 to 2.35) | 2.18 (1.75 to 2.77) |
| 2190 | 72 | 177 | 730.7 (687.0 to 780.9) | 1614.2 (1543.4 to 1683.5) | 883.4 (805.4 to 966.3) | 2.21 (2.05 to 2.37) | 2.75 (2.09 to 3.65) |
| 2555 | 77 | 130 | 850.4 (798.9 to 912.2) | 1815.6 (1740.2 to 1886.7) | 965.2 (870.8 to 1049.8) | 2.14 (1.97 to 2.30) | 1.91 (1.36 to 2.50) |
| 2920 | 62 | 97 | 972.2 (911.8 to 1042.3) | 2003.7 (1918.9 to 2090.4) | 1031.4 (924.5 to 1130.0) | 2.06 (1.90 to 2.21) | 1.78 (1.35 to 2.50) |
| 3285 | 38 | 74 | 1071.0 (1004.8 to 1144.7) | 2189.7 (2085.0 to 2282.8) | 1118.7 (991.7 to 1222.8) | 2.04 (1.88 to 2.20) | 2.24 (1.54 to 3.43) |
| 3650 | 30 | 37 | 1176.9 (1099.2 to 1267.5) | 2316.0 (2204.1 to 2413.9) | 1139.2 (995.6 to 1264.9) | 1.97 (1.80 to 2.13) | 1.43 (0.87 to 2.31) |
| 4015 | 16 | 25 | 1264.9 (1175.1 to 1364.5) | 2451.4 (2322.6 to 2563.6) | 1186.5 (1019.2 to 1328.2) | 1.94 (1.75 to 2.11) | 1.82 (0.97 to 3.70) |
| 4380 | 6 | 13 | 1318.4 (1219.5 to 1437.2) | 2581.9 (2444.3 to 2724.0) | 1263.6 (1088.0 to 1444.4) | 1.96 (1.78 to 2.17) | *** |
| 4745 | 5 | 6 | 1425.0 (1292.9 to 1587.6) | 2747.8 (2537.3 to 2967.5) | 1322.8 (1074.7 to 1565.5) | 1.93 (1.71 to 2.18) | *** |
| 5110 | 0 | 1 | 1425.0 (1292.9 to 1587.6) | 2881.8 (2585.8 to 3239.2) | 1456.9 (1128.8 to 1814.1) | 2.02 (1.76 to 2.34) | *** |

*** IRR/RR was not estimated when there were fewer than 20 events in the risk period or fewer than 5 events in one group.

# Supplementary Table 4. Estimated risk of death by cause-specific (defined by ICD-10 chapters) comparing treated Tuberculosis cases compared to non-exposed controls.

|  | **Number of events** | | **Risk per 100,000 persons** | |  |  |  |
| --- | --- | --- | --- | --- | --- | --- | --- |
| **Time - Days** | **Unexposed** | **Exposed** | **Unexposed** | **Exposed** | **Risk difference per 100,000 - 95% CI** | **Risk ratio - 95% CI** | **Incidence rate ratio - 95% CI** |
| **Cause: All-cause** | | | | | | | |
| 30 | 49 | 158 | 44.1 (32.8 to 56.7) | 142.0 (121.3 to 161.8) | 98.0 (74.1 to 120.3) | 3.22 (2.41 to 4.31) | 3.23 (2.41 to 4.32) |
| 90 | 92 | 359 | 128.2 (108.3 to 150.4) | 470.9 (427.7 to 511.8) | 342.7 (294.5 to 386.2) | 3.67 (3.07 to 4.43) | 3.91 (3.11 to 4.91) |
| 180 | 138 | 469 | 258.3 (229.1 to 290.2) | 913.7 (854.6 to 967.4) | 655.3 (597.9 to 716.0) | 3.54 (3.13 to 4.06) | 3.42 (2.90 to 4.12) |
| 365 | 245 | 843 | 503.6 (460.2 to 546.1) | 1756.2 (1668.9 to 1842.7) | 1252.6 (1158.8 to 1347.0) | 3.49 (3.17 to 3.87) | 3.47 (3.04 to 4.06) |
| 730 | 464 | 1345 | 1025.6 (956.9 to 1086.8) | 3267.4 (3151.0 to 3379.0) | 2241.8 (2105.9 to 2375.9) | 3.19 (2.97 to 3.42) | 2.95 (2.65 to 3.28) |
| 1095 | 418 | 1068 | 1582.4 (1495.5 to 1663.5) | 4686.3 (4548.7 to 4818.9) | 3103.9 (2957.6 to 3264.4) | 2.96 (2.80 to 3.14) | 2.62 (2.35 to 2.90) |
| 1460 | 370 | 928 | 2171.2 (2078.3 to 2275.3) | 6169.0 (6005.2 to 6331.0) | 3997.8 (3808.9 to 4182.0) | 2.84 (2.69 to 2.97) | 2.60 (2.32 to 2.90) |
| 1825 | 305 | 656 | 2761.7 (2645.9 to 2883.9) | 7440.4 (7247.8 to 7633.6) | 4678.7 (4450.2 to 4899.8) | 2.69 (2.56 to 2.83) | 2.24 (1.97 to 2.58) |
| 2190 | 233 | 561 | 3303.3 (3169.0 to 3432.1) | 8747.2 (8554.4 to 8949.2) | 5443.9 (5192.1 to 5684.4) | 2.65 (2.53 to 2.77) | 2.53 (2.21 to 2.92) |
| 2555 | 187 | 403 | 3834.6 (3679.7 to 3993.0) | 9898.0 (9659.9 to 10131.3) | 6063.4 (5797.0 to 6358.7) | 2.58 (2.46 to 2.70) | 2.29 (1.96 to 2.72) |
| 2920 | 166 | 330 | 4445.2 (4270.5 to 4628.4) | 11107.0 (10821.8 to 11378.1) | 6661.9 (6330.5 to 6986.4) | 2.50 (2.38 to 2.62) | 2.12 (1.75 to 2.52) |
| 3285 | 122 | 252 | 5044.4 (4832.8 to 5269.4) | 12325.4 (12002.8 to 12650.1) | 7281.1 (6911.8 to 7650.4) | 2.44 (2.33 to 2.55) | 2.22 (1.77 to 2.76) |
| 3650 | 75 | 153 | 5565.2 (5339.6 to 5810.5) | 13399.1 (13044.5 to 13774.2) | 7834.0 (7391.9 to 8265.8) | 2.41 (2.29 to 2.52) | 2.20 (1.71 to 2.94) |
| 4015 | 53 | 99 | 6223.0 (5966.3 to 6519.9) | 14560.7 (14139.1 to 14972.5) | 8337.7 (7868.0 to 8784.3) | 2.34 (2.22 to 2.45) | 2.03 (1.50 to 2.81) |
| 4380 | 23 | 46 | 6740.7 (6404.0 to 7126.0) | 15629.6 (15115.7 to 16183.8) | 8888.9 (8263.3 to 9508.4) | 2.32 (2.17 to 2.47) | 2.19 (1.33 to 3.89) |
| 4745 | 12 | 6 | 7647.8 (7022.3 to 8337.2) | 16073.9 (15424.5 to 16759.3) | 8426.1 (7387.4 to 9407.7) | 2.10 (1.91 to 2.33) | *** |
| 5110 | 2 | 1 | 8115.6 (7263.9 to 9035.6) | 16322.2 (15575.6 to 17125.4) | 8206.6 (7131.3 to 9453.2) | 2.01 (1.81 to 2.28) | *** |
|  |  |  |  |  |  |  |  |
| **Cause: Natural - excluding (HIV/TB and external causes)** | | | | | | | |
| 30 | 39 | 106 | 35.1 (24.3 to 46.8) | 95.3 (78.2 to 112.3) | 60.2 (39.1 to 80.0) | 2.72 (1.94 to 3.92) | 2.72 (1.94 to 3.93) |
| 90 | 65 | 240 | 94.5 (76.3 to 113.5) | 315.1 (279.4 to 346.6) | 220.6 (181.1 to 258.9) | 3.33 (2.69 to 4.27) | 3.70 (2.88 to 4.91) |
| 180 | 104 | 299 | 192.6 (167.0 to 220.3) | 597.3 (547.6 to 639.5) | 404.7 (353.1 to 453.4) | 3.10 (2.70 to 3.63) | 2.89 (2.37 to 3.59) |
| 365 | 172 | 561 | 364.7 (327.1 to 400.4) | 1158.2 (1090.1 to 1225.0) | 793.5 (719.7 to 870.4) | 3.18 (2.83 to 3.55) | 3.29 (2.79 to 3.95) |
| 730 | 341 | 880 | 748.7 (687.0 to 801.3) | 2149.1 (2055.1 to 2234.0) | 1400.4 (1296.8 to 1500.8) | 2.87 (2.64 to 3.11) | 2.63 (2.33 to 2.99) |
| 1095 | 320 | 739 | 1174.2 (1099.4 to 1245.3) | 3130.3 (3013.3 to 3241.7) | 1956.1 (1840.5 to 2077.5) | 2.67 (2.50 to 2.86) | 2.37 (2.08 to 2.69) |
| 1460 | 294 | 641 | 1641.7 (1560.6 to 1729.1) | 4154.7 (4019.1 to 4294.0) | 2513.0 (2358.5 to 2662.9) | 2.53 (2.38 to 2.68) | 2.26 (2.00 to 2.57) |
| 1825 | 243 | 484 | 2111.8 (2005.8 to 2213.4) | 5093.1 (4943.8 to 5257.1) | 2981.3 (2800.1 to 3177.8) | 2.41 (2.29 to 2.55) | 2.08 (1.81 to 2.46) |
| 2190 | 174 | 401 | 2515.5 (2392.7 to 2641.7) | 6028.7 (5862.6 to 6198.2) | 3513.2 (3301.6 to 3722.4) | 2.40 (2.28 to 2.52) | 2.42 (2.05 to 2.94) |
| 2555 | 144 | 300 | 2924.5 (2792.8 to 3050.9) | 6884.3 (6682.8 to 7094.9) | 3959.8 (3729.5 to 4201.2) | 2.35 (2.23 to 2.49) | 2.21 (1.84 to 2.71) |
| 2920 | 129 | 246 | 3399.0 (3237.5 to 3555.3) | 7786.7 (7554.2 to 8016.9) | 4387.7 (4111.8 to 4662.4) | 2.29 (2.17 to 2.42) | 2.04 (1.65 to 2.45) |
| 3285 | 96 | 191 | 3868.7 (3689.3 to 4060.5) | 8711.1 (8449.3 to 8984.4) | 4842.3 (4541.5 to 5156.1) | 2.25 (2.13 to 2.38) | 2.14 (1.63 to 2.80) |
| 3650 | 60 | 127 | 4283.7 (4080.3 to 4510.5) | 9607.3 (9290.8 to 9930.4) | 5323.6 (4961.2 to 5662.3) | 2.24 (2.12 to 2.37) | 2.29 (1.74 to 3.04) |
| 4015 | 42 | 78 | 4805.9 (4583.8 to 5068.6) | 10531.5 (10156.2 to 10890.4) | 5725.5 (5322.3 to 6096.3) | 2.19 (2.07 to 2.32) | 2.02 (1.44 to 2.82) |
| 4380 | 21 | 38 | 5280.5 (4946.7 to 5651.8) | 11378.7 (10947.0 to 11845.7) | 6098.2 (5565.6 to 6600.4) | 2.15 (2.01 to 2.31) | 1.98 (1.22 to 3.55) |
| 4745 | 12 | 5 | 6187.6 (5585.3 to 6828.4) | 11756.4 (11220.3 to 12389.8) | 5568.8 (4687.4 to 6410.8) | 1.90 (1.70 to 2.15) | *** |
| 5110 | 2 | 0 | 6655.3 (5826.3 to 7501.2) | 11756.4 (11220.3 to 12389.8) | 5101.0 (4105.4 to 6128.4) | 1.77 (1.55 to 2.03) | *** |
| **Cause: Cancer** | | | | | | | |
| 30 | 7 | 29 | 6.3 (2.7 to 11.7) | 26.1 (17.1 to 36.0) | 19.8 (9.8 to 31.9) | 4.13 (2.09 to 12.00) | 4.14 (2.09 to 12.01) |
| 90 | 8 | 71 | 13.6 (6.4 to 20.0) | 91.1 (72.9 to 108.6) | 77.5 (58.4 to 97.2) | 6.69 (4.31 to 13.58) | 8.89 (4.96 to 24.06) |
| 180 | 18 | 73 | 30.6 (19.6 to 41.3) | 159.9 (136.1 to 184.5) | 129.4 (104.8 to 155.8) | 5.23 (3.79 to 7.96) | 4.08 (2.61 to 7.68) |
| 365 | 38 | 123 | 68.6 (52.8 to 84.5) | 283.0 (249.3 to 315.6) | 214.5 (177.3 to 250.8) | 4.13 (3.21 to 5.53) | 3.27 (2.38 to 5.03) |
| 730 | 60 | 185 | 136.4 (113.8 to 158.1) | 490.9 (447.5 to 534.2) | 354.5 (302.7 to 404.8) | 3.60 (3.00 to 4.44) | 3.14 (2.36 to 4.47) |
| 1095 | 65 | 135 | 222.5 (189.4 to 252.1) | 669.3 (613.6 to 722.9) | 446.8 (389.4 to 507.3) | 3.01 (2.63 to 3.63) | 2.13 (1.66 to 2.82) |
| 1460 | 64 | 120 | 325.1 (283.5 to 362.9) | 861.8 (796.1 to 925.0) | 536.7 (468.8 to 608.5) | 2.65 (2.33 to 3.07) | 1.94 (1.46 to 2.63) |
| 1825 | 42 | 93 | 405.3 (359.5 to 452.8) | 1040.6 (971.6 to 1111.0) | 635.3 (554.4 to 715.7) | 2.57 (2.27 to 2.94) | 2.31 (1.67 to 3.25) |
| 2190 | 28 | 70 | 469.4 (417.4 to 522.6) | 1203.3 (1126.1 to 1285.3) | 733.8 (641.0 to 830.0) | 2.56 (2.27 to 2.91) | 2.63 (1.81 to 4.26) |
| 2555 | 21 | 54 | 529.9 (471.5 to 589.4) | 1357.9 (1270.2 to 1449.7) | 828.0 (719.3 to 938.9) | 2.56 (2.26 to 2.91) | 2.73 (1.74 to 4.91) |
| 2920 | 30 | 43 | 639.3 (571.9 to 709.9) | 1516.1 (1421.6 to 1615.6) | 876.7 (753.5 to 998.8) | 2.37 (2.09 to 2.69) | 1.53 (0.96 to 2.62) |
| 3285 | 20 | 35 | 736.0 (654.6 to 814.1) | 1685.3 (1572.2 to 1807.3) | 949.3 (796.1 to 1099.4) | 2.29 (2.00 to 2.65) | 1.88 (1.08 to 3.58) |
| 3650 | 17 | 27 | 853.2 (752.8 to 955.2) | 1872.8 (1735.8 to 1999.2) | 1019.6 (855.2 to 1182.5) | 2.20 (1.91 to 2.53) | 1.72 (0.95 to 3.30) |
| 4015 | 12 | 10 | 994.5 (869.9 to 1122.1) | 1991.8 (1842.7 to 2146.2) | 997.2 (798.4 to 1191.9) | 2.00 (1.73 to 2.33) | 0.91 (0.36 to 2.37) |
| 4380 | 3 | 9 | 1057.1 (915.5 to 1207.1) | 2185.7 (1989.6 to 2402.7) | 1128.6 (877.1 to 1395.0) | 2.07 (1.76 to 2.48) | *** |
| 4745 | 3 | 1 | 1298.8 (1020.8 to 1581.2) | 2247.4 (2014.6 to 2491.0) | 948.6 (571.5 to 1347.0) | 1.73 (1.38 to 2.24) | *** |
| 5110 | 0 | 0 | 1298.8 (1020.8 to 1581.2) | 2247.4 (2014.6 to 2491.0) | 948.6 (571.5 to 1347.0) | 1.73 (1.38 to 2.24) | *** |
| **Cause: Cardiovascular** | | | | | | | |
| 30 | 11 | 19 | 9.9 (4.5 to 16.2) | 17.1 (9.9 to 25.6) | 7.2 (-2.7 to 17.6) | 1.73 (0.81 to 4.25) | 1.73 (0.81 to 4.26) |
| 90 | 28 | 44 | 35.5 (24.5 to 47.2) | 57.3 (44.6 to 72.7) | 21.9 (5.1 to 40.9) | 1.62 (1.12 to 2.53) | 1.57 (1.03 to 2.58) |
| 180 | 41 | 54 | 74.1 (59.2 to 88.7) | 108.3 (88.7 to 128.8) | 34.1 (12.8 to 59.9) | 1.46 (1.16 to 1.96) | 1.32 (0.91 to 1.98) |
| 365 | 45 | 115 | 119.1 (100.0 to 140.7) | 223.3 (192.0 to 255.1) | 104.2 (73.0 to 139.4) | 1.87 (1.56 to 2.32) | 2.58 (1.90 to 3.65) |
| 730 | 115 | 191 | 248.2 (216.1 to 280.6) | 439.1 (395.3 to 482.7) | 190.8 (136.6 to 246.9) | 1.77 (1.51 to 2.12) | 1.69 (1.33 to 2.11) |
| 1095 | 108 | 162 | 392.8 (349.7 to 433.0) | 655.4 (607.0 to 710.9) | 262.6 (199.4 to 331.4) | 1.67 (1.47 to 1.92) | 1.54 (1.26 to 1.94) |
| 1460 | 95 | 146 | 543.9 (495.9 to 597.5) | 888.8 (823.8 to 957.8) | 344.9 (261.7 to 417.4) | 1.63 (1.45 to 1.83) | 1.59 (1.27 to 2.06) |
| 1825 | 74 | 98 | 686.5 (627.3 to 744.6) | 1079.6 (1006.7 to 1150.0) | 393.1 (306.5 to 481.8) | 1.57 (1.42 to 1.75) | 1.38 (1.04 to 1.93) |
| 2190 | 61 | 98 | 828.0 (758.4 to 893.8) | 1307.6 (1231.6 to 1393.2) | 479.6 (383.2 to 590.5) | 1.58 (1.43 to 1.76) | 1.69 (1.26 to 2.30) |
| 2555 | 55 | 71 | 983.8 (903.7 to 1070.2) | 1509.1 (1416.0 to 1609.6) | 525.3 (410.1 to 652.9) | 1.53 (1.39 to 1.71) | 1.37 (0.97 to 1.94) |
| 2920 | 32 | 47 | 1102.6 (1009.9 to 1196.4) | 1680.2 (1569.9 to 1798.3) | 577.6 (435.4 to 719.8) | 1.52 (1.37 to 1.70) | 1.57 (0.99 to 2.63) |
| 3285 | 44 | 45 | 1320.8 (1210.7 to 1440.9) | 1899.2 (1781.8 to 2027.1) | 578.5 (407.0 to 734.9) | 1.44 (1.29 to 1.59) | 1.10 (0.71 to 1.68) |
| 3650 | 19 | 24 | 1451.7 (1321.0 to 1581.8) | 2068.2 (1929.7 to 2217.6) | 616.4 (425.4 to 809.9) | 1.42 (1.27 to 1.60) | 1.37 (0.74 to 2.91) |
| 4015 | 17 | 23 | 1675.1 (1502.8 to 1856.8) | 2348.5 (2156.9 to 2528.7) | 673.4 (437.0 to 907.3) | 1.40 (1.24 to 1.59) | 1.47 (0.78 to 2.74) |
| 4380 | 7 | 9 | 1851.5 (1656.6 to 2087.1) | 2547.1 (2347.5 to 2776.2) | 695.6 (407.3 to 992.3) | 1.38 (1.20 to 1.59) | *** |
| 4745 | 4 | 1 | 2165.0 (1833.4 to 2553.2) | 2621.3 (2393.1 to 2881.6) | 456.2 (4.9 to 920.3) | 1.21 (1.00 to 1.49) | *** |
| 5110 | 0 | 0 | 2165.0 (1833.4 to 2553.2) | 2621.3 (2393.1 to 2881.6) | 456.2 (4.9 to 920.3) | 1.21 (1.00 to 1.49) | *** |
| **Cause: Endocrine** | | | | | | | |
| 30 | 3 | 8 | 2.7 (0.0 to 6.3) | 7.2 (2.7 to 12.6) | 4.5 (-1.8 to 10.8) | *** | *** |
| 90 | 5 | 11 | 7.3 (2.7 to 12.8) | 17.3 (10.0 to 25.4) | 10.0 (0.9 to 19.2) | 2.37 (1.10 to 6.39) | *** |
| 180 | 10 | 24 | 16.8 (9.3 to 24.3) | 40.0 (28.8 to 53.1) | 23.2 (8.3 to 38.0) | 2.38 (1.36 to 4.47) | 2.41 (1.21 to 6.28) |
| 365 | 16 | 37 | 32.5 (22.0 to 43.5) | 77.0 (60.9 to 94.4) | 44.4 (24.0 to 64.3) | 2.37 (1.61 to 3.66) | 2.33 (1.37 to 4.49) |
| 730 | 28 | 68 | 64.1 (49.0 to 80.0) | 154.0 (128.8 to 180.2) | 89.9 (61.8 to 121.6) | 2.40 (1.81 to 3.25) | 2.47 (1.67 to 3.97) |
| 1095 | 24 | 63 | 95.9 (76.7 to 114.3) | 237.8 (207.0 to 273.0) | 141.8 (105.2 to 180.9) | 2.48 (1.96 to 3.19) | 2.70 (1.78 to 4.38) |
| 1460 | 22 | 49 | 130.5 (105.0 to 154.7) | 316.1 (277.7 to 356.6) | 185.5 (142.4 to 231.3) | 2.42 (1.95 to 3.12) | 2.31 (1.42 to 3.93) |
| 1825 | 20 | 46 | 169.8 (139.9 to 200.7) | 406.7 (362.4 to 456.3) | 236.8 (182.8 to 293.9) | 2.39 (1.96 to 3.02) | 2.40 (1.49 to 4.41) |
| 2190 | 12 | 38 | 197.6 (165.2 to 231.8) | 496.5 (444.4 to 552.7) | 298.9 (237.3 to 364.2) | 2.51 (2.07 to 3.11) | 3.33 (1.75 to 6.83) |
| 2555 | 11 | 23 | 228.0 (192.1 to 268.5) | 562.9 (502.7 to 625.3) | 334.9 (263.6 to 407.5) | 2.47 (2.05 to 2.99) | 2.22 (1.06 to 5.08) |
| 2920 | 8 | 20 | 257.3 (215.6 to 304.4) | 637.2 (562.8 to 706.7) | 379.9 (292.4 to 460.4) | 2.48 (2.01 to 3.03) | 2.67 (1.22 to 7.26) |
| 3285 | 5 | 21 | 281.4 (235.3 to 331.7) | 737.0 (657.7 to 820.8) | 455.6 (357.7 to 551.6) | 2.62 (2.12 to 3.24) | 4.51 (2.03 to 20.50) |
| 3650 | 3 | 9 | 301.7 (251.3 to 354.2) | 797.9 (703.2 to 890.7) | 496.2 (386.8 to 597.0) | 2.64 (2.16 to 3.26) | *** |
| 4015 | 1 | 6 | 314.3 (257.4 to 371.8) | 861.2 (757.0 to 966.1) | 547.0 (423.4 to 654.4) | 2.74 (2.21 to 3.40) | *** |
| 4380 | 1 | 5 | 344.3 (269.0 to 436.9) | 972.1 (828.5 to 1115.1) | 627.8 (461.3 to 792.1) | 2.82 (2.10 to 3.74) | *** |
| 4745 | 1 | 0 | 450.3 (290.6 to 699.6) | 972.1 (828.5 to 1115.1) | 521.8 (244.6 to 737.3) | 2.16 (1.36 to 3.42) | *** |
| 5110 | 0 | 0 | 450.3 (290.6 to 699.6) | 972.1 (828.5 to 1115.1) | 521.8 (244.6 to 737.3) | 2.16 (1.36 to 3.42) | *** |
| **Cause: Respiratory** | | | | | | | |
| 30 | 4 | 23 | 3.6 (0.0 to 7.2) | 20.7 (11.7 to 29.2) | 17.1 (8.5 to 26.5) | *** | *** |
| 90 | 5 | 44 | 8.2 (3.6 to 13.6) | 61.0 (46.4 to 75.2) | 52.9 (37.0 to 67.9) | 7.48 (4.25 to 17.87) | 8.82 (4.12 to 44.10) |
| 180 | 14 | 66 | 21.4 (13.8 to 30.3) | 123.4 (103.8 to 141.4) | 102.0 (79.5 to 121.9) | 5.77 (3.81 to 8.70) | 4.74 (2.72 to 9.31) |
| 365 | 17 | 113 | 38.4 (26.9 to 49.6) | 236.2 (205.4 to 261.1) | 197.8 (166.9 to 223.7) | 6.15 (4.71 to 8.78) | 6.71 (4.37 to 11.98) |
| 730 | 39 | 181 | 82.9 (65.3 to 100.3) | 440.5 (400.5 to 481.3) | 357.6 (316.0 to 400.3) | 5.31 (4.25 to 6.72) | 4.72 (3.46 to 6.80) |
| 1095 | 37 | 148 | 131.8 (108.1 to 157.1) | 637.9 (588.2 to 685.4) | 506.1 (451.3 to 557.6) | 4.84 (3.98 to 5.87) | 4.11 (2.89 to 5.99) |
| 1460 | 25 | 134 | 171.6 (145.0 to 202.1) | 852.4 (789.1 to 912.0) | 680.7 (610.4 to 747.1) | 4.97 (4.12 to 6.08) | 5.55 (3.70 to 9.00) |
| 1825 | 35 | 86 | 239.3 (204.9 to 278.7) | 1020.1 (950.0 to 1091.5) | 780.8 (705.7 to 858.2) | 4.26 (3.64 to 5.11) | 2.56 (1.84 to 3.88) |
| 2190 | 21 | 65 | 289.0 (248.0 to 335.3) | 1171.2 (1092.2 to 1252.7) | 882.2 (798.0 to 976.4) | 4.05 (3.48 to 4.80) | 3.26 (2.06 to 6.00) |
| 2555 | 21 | 55 | 349.6 (297.1 to 407.5) | 1328.5 (1249.0 to 1422.9) | 979.0 (887.0 to 1082.8) | 3.80 (3.27 to 4.51) | 2.78 (1.73 to 4.96) |
| 2920 | 16 | 53 | 407.9 (347.7 to 472.6) | 1523.7 (1436.6 to 1638.4) | 1115.7 (1008.7 to 1239.7) | 3.73 (3.22 to 4.41) | 3.54 (2.14 to 6.76) |
| 3285 | 6 | 35 | 437.5 (375.8 to 504.5) | 1693.9 (1580.1 to 1821.0) | 1256.4 (1130.0 to 1389.2) | 3.87 (3.30 to 4.52) | 6.27 (2.96 to 21.03) |
| 3650 | 4 | 25 | 469.6 (401.8 to 544.3) | 1876.8 (1720.1 to 2023.5) | 1407.2 (1241.7 to 1561.3) | 4.00 (3.36 to 4.68) | *** |
| 4015 | 4 | 14 | 520.9 (445.0 to 612.7) | 2039.6 (1872.0 to 2215.4) | 1518.7 (1306.8 to 1701.8) | 3.92 (3.21 to 4.64) | *** |
| 4380 | 2 | 7 | 559.0 (471.2 to 673.3) | 2205.1 (2012.0 to 2416.6) | 1646.1 (1398.7 to 1864.8) | 3.94 (3.18 to 4.78) | *** |
| 4745 | 1 | 2 | 612.3 (487.7 to 762.6) | 2388.5 (2061.0 to 2821.0) | 1776.3 (1411.0 to 2163.4) | 3.90 (2.88 to 5.07) | *** |
| 5110 | 0 | 0 | 612.3 (487.7 to 762.6) | 2388.5 (2061.0 to 2821.0) | 1776.3 (1411.0 to 2163.4) | 3.90 (2.88 to 5.07) | *** |
| **Cause: External** | | | | | | | |
| 30 | 10 | 21 | 9.0 (4.0 to 15.3) | 18.9 (10.8 to 27.8) | 9.9 (-0.5 to 18.9) | 2.10 (0.97 to 4.89) | 2.10 (0.97 to 4.91) |
| 90 | 25 | 49 | 31.8 (22.7 to 42.8) | 63.8 (48.7 to 78.9) | 31.9 (14.8 to 51.2) | 2.00 (1.37 to 3.06) | 1.96 (1.24 to 3.23) |
| 180 | 30 | 74 | 60.1 (46.2 to 76.0) | 133.8 (112.9 to 157.6) | 73.7 (47.4 to 101.1) | 2.23 (1.68 to 3.02) | 2.48 (1.67 to 3.95) |
| 365 | 68 | 128 | 128.4 (107.4 to 151.2) | 261.9 (232.4 to 295.5) | 133.5 (97.7 to 172.4) | 2.04 (1.66 to 2.53) | 1.90 (1.44 to 2.70) |
| 730 | 115 | 240 | 257.4 (227.1 to 288.0) | 531.2 (484.9 to 577.2) | 273.7 (218.6 to 331.5) | 2.06 (1.79 to 2.40) | 2.12 (1.71 to 2.67) |
| 1095 | 95 | 168 | 384.6 (345.0 to 426.8) | 754.9 (697.5 to 816.4) | 370.4 (301.3 to 444.5) | 1.96 (1.73 to 2.24) | 1.82 (1.42 to 2.36) |
| 1460 | 67 | 152 | 491.6 (449.1 to 539.8) | 998.3 (931.7 to 1063.0) | 506.6 (425.7 to 587.5) | 2.03 (1.81 to 2.27) | 2.35 (1.76 to 3.09) |
| 1825 | 60 | 110 | 608.1 (559.6 to 666.8) | 1211.6 (1137.9 to 1295.9) | 603.4 (516.5 to 692.1) | 1.99 (1.79 to 2.22) | 1.91 (1.36 to 2.64) |
| 2190 | 48 | 93 | 720.2 (658.2 to 792.1) | 1428.1 (1347.7 to 1527.2) | 707.8 (607.0 to 809.3) | 1.98 (1.79 to 2.20) | 2.04 (1.44 to 2.83) |
| 2555 | 40 | 62 | 834.6 (758.4 to 911.7) | 1605.7 (1512.3 to 1708.4) | 771.1 (666.3 to 891.0) | 1.92 (1.74 to 2.15) | 1.64 (1.19 to 2.61) |
| 2920 | 36 | 49 | 966.5 (890.3 to 1053.7) | 1783.5 (1684.4 to 1895.8) | 817.0 (692.9 to 952.5) | 1.85 (1.67 to 2.05) | 1.45 (0.99 to 2.22) |
| 3285 | 22 | 33 | 1075.8 (985.7 to 1177.8) | 1943.7 (1830.9 to 2067.9) | 867.9 (727.0 to 1033.8) | 1.81 (1.63 to 2.02) | 1.61 (0.96 to 2.72) |
| 3650 | 13 | 13 | 1168.6 (1067.8 to 1282.1) | 2032.7 (1911.3 to 2171.5) | 864.1 (707.5 to 1031.9) | 1.74 (1.57 to 1.95) | 1.08 (0.47 to 2.52) |
| 4015 | 8 | 15 | 1268.1 (1133.6 to 1401.8) | 2199.0 (2047.7 to 2355.6) | 930.8 (726.3 to 1121.9) | 1.73 (1.53 to 1.98) | *** |
| 4380 | 1 | 6 | 1294.4 (1156.0 to 1438.1) | 2365.7 (2156.5 to 2560.4) | 1071.3 (811.1 to 1313.6) | 1.83 (1.58 to 2.13) | *** |
| 4745 | 0 | 0 | 1294.4 (1156.0 to 1438.1) | 2365.7 (2156.5 to 2560.4) | 1071.3 (811.1 to 1313.6) | 1.83 (1.58 to 2.13) | *** |
| 5110 | 0 | 1 | 1294.4 (1156.0 to 1438.1) | 2614.0 (2228.2 to 3204.4) | 1319.6 (887.7 to 1926.2) | 2.02 (1.62 to 2.48) | *** |

*** IRR/RR was not estimated when there were fewer than 20 events in the risk period or fewer than 5 events in one group.

# Supplementary Table 5. Estimated risk of death by cause-specific (defined by ICD-10 chapters) comparing household Tuberculosis contacts compared to non-exposed controls.

|  | **Number of events** | | **Risk per 100,000** | |  |  |  |
| --- | --- | --- | --- | --- | --- | --- | --- |
| **Time - Days** | **Unexposed** | **Exposed** | **Unexposed** | **Exposed** | **Risk difference per 100,000 - 95% CI** | **Risk ratio - 95% CI** | **Incidence rate ratio - 95% CI** |
| **Cause: All-cause** | | | | | | | |
| 30 | 100 | 135 | 22.4 (18.1 to 27.3) | 30.2 (24.9 to 35.2) | 7.8 (1.4 to 14.1) | 1.35 (1.06 to 1.76) | 1.35 (1.06 to 1.76) |
| 90 | 187 | 255 | 65.0 (57.4 to 72.6) | 88.3 (80.3 to 97.2) | 23.3 (11.5 to 34.6) | 1.36 (1.16 to 1.58) | 1.36 (1.13 to 1.64) |
| 180 | 272 | 348 | 129.0 (117.8 to 140.3) | 170.0 (157.1 to 182.6) | 41.0 (23.8 to 56.5) | 1.32 (1.17 to 1.47) | 1.28 (1.08 to 1.52) |
| 365 | 573 | 760 | 270.9 (254.8 to 286.2) | 358.0 (339.6 to 374.7) | 87.2 (63.8 to 109.7) | 1.32 (1.23 to 1.43) | 1.33 (1.19 to 1.48) |
| 730 | 1056 | 1268 | 561.3 (537.8 to 586.2) | 706.1 (680.8 to 730.5) | 144.8 (112.3 to 180.9) | 1.26 (1.20 to 1.33) | 1.20 (1.11 to 1.32) |
| 1095 | 891 | 1094 | 844.4 (814.9 to 875.4) | 1052.8 (1019.9 to 1084.5) | 208.5 (164.0 to 248.4) | 1.25 (1.19 to 1.30) | 1.23 (1.13 to 1.33) |
| 1460 | 810 | 905 | 1143.2 (1107.6 to 1180.9) | 1385.9 (1347.8 to 1425.0) | 242.8 (189.6 to 294.9) | 1.21 (1.16 to 1.26) | 1.12 (1.03 to 1.22) |
| 1825 | 713 | 793 | 1452.3 (1414.0 to 1498.3) | 1728.3 (1676.8 to 1777.4) | 276.0 (209.9 to 332.2) | 1.19 (1.14 to 1.23) | 1.12 (1.01 to 1.25) |
| 2190 | 568 | 690 | 1746.4 (1700.6 to 1799.4) | 2083.7 (2026.6 to 2138.3) | 337.3 (266.7 to 408.4) | 1.19 (1.15 to 1.24) | 1.22 (1.10 to 1.36) |
| 2555 | 502 | 557 | 2061.7 (2005.5 to 2122.1) | 2436.4 (2372.0 to 2502.2) | 374.7 (296.8 to 459.0) | 1.18 (1.14 to 1.22) | 1.11 (0.99 to 1.25) |
| 2920 | 426 | 449 | 2400.5 (2337.7 to 2463.1) | 2793.9 (2722.4 to 2865.8) | 393.3 (305.0 to 485.5) | 1.16 (1.12 to 1.21) | 1.06 (0.93 to 1.20) |
| 3285 | 315 | 365 | 2724.1 (2651.7 to 2796.5) | 3171.0 (3095.3 to 3245.7) | 446.9 (343.9 to 553.2) | 1.16 (1.12 to 1.21) | 1.16 (1.00 to 1.33) |
| 3650 | 276 | 278 | 3119.4 (3029.4 to 3204.1) | 3562.0 (3472.7 to 3653.5) | 442.6 (325.3 to 566.0) | 1.14 (1.10 to 1.19) | 1.01 (0.84 to 1.21) |
| 4015 | 168 | 192 | 3478.5 (3371.0 to 3578.6) | 3970.6 (3866.9 to 4079.0) | 492.1 (345.3 to 643.0) | 1.14 (1.10 to 1.19) | 1.15 (0.93 to 1.42) |
| 4380 | 97 | 116 | 3853.2 (3703.2 to 3978.6) | 4437.3 (4304.6 to 4571.3) | 584.1 (399.4 to 769.6) | 1.15 (1.10 to 1.21) | 1.20 (0.91 to 1.63) |
| 4745 | 35 | 31 | 4203.3 (4015.2 to 4402.6) | 4728.3 (4554.1 to 4918.2) | 525.0 (270.2 to 784.6) | 1.12 (1.06 to 1.19) | 0.89 (0.52 to 1.47) |
| 5110 | 15 | 14 | 4662.0 (4375.8 to 4986.3) | 5116.8 (4817.1 to 5410.1) | 454.8 (2.3 to 862.5) | 1.10 (1.00 to 1.19) | 0.94 (0.37 to 1.92) |
| **Cause: Natural - excluding (HIV/TB and external causes)** | | | | | | | |
| 30 | 70 | 88 | 15.7 (12.3 to 19.9) | 19.7 (15.6 to 23.9) | 4.0 (-2.0 to 9.2) | 1.26 (0.89 to 1.67) | 1.26 (0.89 to 1.67) |
| 90 | 119 | 159 | 42.8 (36.7 to 49.4) | 55.9 (49.2 to 62.6) | 13.1 (3.9 to 22.1) | 1.31 (1.08 to 1.59) | 1.34 (1.04 to 1.72) |
| 180 | 201 | 233 | 90.1 (80.9 to 99.4) | 110.6 (100.6 to 120.0) | 20.6 (6.8 to 33.5) | 1.23 (1.07 to 1.41) | 1.16 (0.95 to 1.42) |
| 365 | 396 | 488 | 188.2 (174.1 to 201.1) | 231.4 (217.6 to 245.9) | 43.2 (25.3 to 61.7) | 1.23 (1.13 to 1.35) | 1.23 (1.09 to 1.41) |
| 730 | 738 | 830 | 391.2 (371.3 to 411.2) | 459.0 (438.8 to 479.9) | 67.9 (39.1 to 96.0) | 1.17 (1.10 to 1.26) | 1.13 (1.01 to 1.25) |
| 1095 | 630 | 699 | 591.2 (567.2 to 615.6) | 680.8 (654.4 to 708.7) | 89.6 (53.2 to 124.3) | 1.15 (1.09 to 1.22) | 1.11 (0.99 to 1.23) |
| 1460 | 543 | 574 | 791.6 (762.8 to 821.7) | 892.2 (859.6 to 923.2) | 100.6 (56.3 to 140.4) | 1.13 (1.07 to 1.18) | 1.06 (0.95 to 1.18) |
| 1825 | 487 | 506 | 1002.9 (970.3 to 1037.0) | 1110.5 (1074.2 to 1147.2) | 107.6 (57.6 to 153.4) | 1.11 (1.06 to 1.16) | 1.04 (0.93 to 1.19) |
| 2190 | 390 | 432 | 1204.5 (1166.9 to 1244.1) | 1332.9 (1289.3 to 1376.7) | 128.4 (72.8 to 183.3) | 1.11 (1.06 to 1.15) | 1.11 (0.98 to 1.26) |
| 2555 | 321 | 361 | 1406.0 (1360.2 to 1454.2) | 1561.0 (1513.3 to 1613.0) | 154.9 (90.3 to 218.3) | 1.11 (1.06 to 1.16) | 1.13 (0.98 to 1.32) |
| 2920 | 285 | 293 | 1632.7 (1581.7 to 1679.5) | 1793.2 (1735.8 to 1853.8) | 160.5 (85.9 to 231.7) | 1.10 (1.05 to 1.14) | 1.03 (0.88 to 1.21) |
| 3285 | 195 | 241 | 1832.5 (1776.0 to 1893.1) | 2042.1 (1976.7 to 2102.2) | 209.6 (126.1 to 286.3) | 1.11 (1.07 to 1.16) | 1.24 (1.01 to 1.48) |
| 3650 | 185 | 164 | 2099.7 (2035.9 to 2170.8) | 2272.7 (2198.6 to 2337.7) | 173.1 (75.1 to 263.4) | 1.08 (1.03 to 1.13) | 0.89 (0.71 to 1.09) |
| 4015 | 107 | 120 | 2326.6 (2247.9 to 2408.0) | 2533.5 (2442.2 to 2613.1) | 206.9 (86.5 to 325.9) | 1.09 (1.04 to 1.14) | 1.13 (0.87 to 1.47) |
| 4380 | 56 | 82 | 2542.5 (2444.0 to 2642.1) | 2859.8 (2747.0 to 2966.9) | 317.2 (170.2 to 472.0) | 1.12 (1.07 to 1.19) | 1.47 (1.05 to 2.23) |
| 4745 | 24 | 17 | 2800.9 (2668.4 to 2971.1) | 3026.7 (2882.2 to 3178.6) | 225.8 (16.2 to 414.0) | 1.08 (1.01 to 1.15) | 0.71 (0.38 to 1.27) |
| 5110 | 10 | 7 | 3113.7 (2878.6 to 3382.7) | 3245.0 (3017.8 to 3486.0) | 131.3 (-227.8 to 449.0) | 1.04 (0.93 to 1.15) | *** |
| **Cause: Cancer** | | | | | | | |
| 30 | 11 | 16 | 2.5 (1.1 to 4.0) | 3.6 (1.8 to 5.4) | 1.1 (-1.1 to 3.4) | 1.45 (0.68 to 3.41) | 1.45 (0.68 to 3.42) |
| 90 | 25 | 27 | 8.2 (5.6 to 11.1) | 9.7 (7.0 to 12.7) | 1.6 (-1.9 to 5.4) | 1.19 (0.81 to 1.87) | 1.08 (0.63 to 1.84) |
| 180 | 39 | 49 | 17.3 (13.7 to 21.8) | 21.2 (17.5 to 25.3) | 3.9 (-2.0 to 9.7) | 1.22 (0.90 to 1.62) | 1.26 (0.83 to 2.02) |
| 365 | 58 | 86 | 31.7 (26.5 to 37.5) | 42.5 (35.8 to 48.0) | 10.8 (2.8 to 18.0) | 1.34 (1.08 to 1.64) | 1.48 (1.06 to 2.08) |
| 730 | 159 | 147 | 75.5 (67.2 to 84.6) | 82.7 (73.4 to 91.3) | 7.2 (-5.3 to 19.9) | 1.10 (0.94 to 1.28) | 0.93 (0.72 to 1.18) |
| 1095 | 133 | 122 | 117.8 (107.4 to 130.6) | 121.3 (109.5 to 132.4) | 3.5 (-12.5 to 19.3) | 1.03 (0.90 to 1.18) | 0.92 (0.71 to 1.14) |
| 1460 | 117 | 109 | 161.0 (149.0 to 176.1) | 161.6 (148.5 to 174.4) | 0.6 (-17.5 to 19.7) | 1.00 (0.89 to 1.13) | 0.93 (0.73 to 1.19) |
| 1825 | 87 | 100 | 198.6 (183.9 to 215.7) | 204.5 (188.3 to 220.9) | 5.9 (-16.6 to 30.3) | 1.03 (0.92 to 1.16) | 1.15 (0.89 to 1.58) |
| 2190 | 86 | 77 | 243.0 (225.3 to 262.6) | 244.6 (226.5 to 264.0) | 1.6 (-25.7 to 27.7) | 1.01 (0.90 to 1.12) | 0.90 (0.68 to 1.23) |
| 2555 | 60 | 71 | 280.8 (261.3 to 301.2) | 289.8 (266.9 to 313.7) | 9.1 (-20.0 to 42.1) | 1.03 (0.93 to 1.16) | 1.19 (0.89 to 1.64) |
| 2920 | 48 | 48 | 318.9 (297.5 to 342.4) | 327.6 (303.0 to 352.7) | 8.7 (-27.2 to 43.1) | 1.03 (0.92 to 1.14) | 1.00 (0.66 to 1.47) |
| 3285 | 33 | 41 | 352.9 (327.7 to 378.9) | 370.0 (341.9 to 398.7) | 17.2 (-21.6 to 58.1) | 1.05 (0.94 to 1.17) | 1.25 (0.79 to 2.03) |
| 3650 | 27 | 26 | 391.2 (364.5 to 421.5) | 406.8 (376.2 to 437.3) | 15.6 (-29.5 to 60.1) | 1.04 (0.93 to 1.16) | 0.97 (0.55 to 1.59) |
| 4015 | 20 | 27 | 432.3 (398.3 to 466.0) | 464.6 (427.2 to 501.6) | 32.3 (-20.2 to 82.3) | 1.07 (0.96 to 1.20) | 1.36 (0.79 to 2.53) |
| 4380 | 15 | 17 | 488.5 (443.8 to 531.6) | 530.5 (484.5 to 583.6) | 42.0 (-21.1 to 116.6) | 1.09 (0.96 to 1.25) | 1.14 (0.56 to 2.80) |
| 4745 | 3 | 2 | 508.9 (459.6 to 559.3) | 547.2 (495.3 to 603.6) | 38.2 (-36.8 to 118.5) | 1.08 (0.93 to 1.24) | *** |
| 5110 | 3 | 2 | 604.4 (503.9 to 746.3) | 623.3 (521.5 to 752.5) | 18.9 (-142.9 to 178.3) | 1.03 (0.80 to 1.34) | *** |
| **Cause: Cardiovascular** | | | | | | | |
| 30 | 17 | 29 | 3.8 (2.2 to 5.8) | 6.5 (3.9 to 9.2) | 2.7 (-0.2 to 5.6) | 1.70 (0.95 to 3.30) | 1.71 (0.95 to 3.31) |
| 90 | 33 | 48 | 11.3 (8.4 to 15.0) | 17.4 (13.4 to 21.3) | 6.1 (1.1 to 11.0) | 1.54 (1.08 to 2.22) | 1.45 (0.91 to 2.26) |
| 180 | 69 | 67 | 27.6 (22.9 to 32.7) | 33.2 (27.2 to 38.2) | 5.6 (-1.8 to 12.3) | 1.20 (0.94 to 1.50) | 0.97 (0.69 to 1.37) |
| 365 | 137 | 162 | 61.5 (53.9 to 69.1) | 73.2 (65.4 to 81.2) | 11.7 (1.1 to 22.3) | 1.19 (1.02 to 1.40) | 1.18 (0.96 to 1.48) |
| 730 | 246 | 260 | 129.2 (118.9 to 141.3) | 144.4 (133.2 to 157.7) | 15.2 (-1.5 to 31.9) | 1.12 (0.99 to 1.26) | 1.06 (0.89 to 1.25) |
| 1095 | 195 | 235 | 191.4 (178.3 to 206.3) | 219.4 (204.7 to 234.4) | 28.0 (7.3 to 49.9) | 1.15 (1.04 to 1.28) | 1.21 (1.00 to 1.44) |
| 1460 | 181 | 158 | 258.2 (241.4 to 277.0) | 277.8 (259.3 to 296.6) | 19.5 (-5.4 to 43.9) | 1.08 (0.98 to 1.18) | 0.88 (0.70 to 1.09) |
| 1825 | 160 | 151 | 327.7 (308.8 to 348.8) | 342.9 (321.2 to 364.8) | 15.2 (-14.0 to 43.2) | 1.05 (0.96 to 1.14) | 0.95 (0.76 to 1.16) |
| 2190 | 118 | 132 | 388.7 (368.5 to 410.4) | 411.1 (387.4 to 437.7) | 22.4 (-10.1 to 52.7) | 1.06 (0.98 to 1.14) | 1.12 (0.89 to 1.44) |
| 2555 | 101 | 122 | 452.2 (429.6 to 479.0) | 488.3 (462.4 to 518.3) | 36.1 (1.6 to 72.6) | 1.08 (1.00 to 1.17) | 1.21 (0.92 to 1.57) |
| 2920 | 98 | 99 | 529.9 (503.0 to 561.1) | 566.6 (538.6 to 598.9) | 36.7 (-3.9 to 75.3) | 1.07 (0.99 to 1.15) | 1.01 (0.79 to 1.36) |
| 3285 | 74 | 82 | 606.0 (574.5 to 639.2) | 651.0 (617.6 to 688.2) | 45.0 (-4.3 to 90.1) | 1.07 (0.99 to 1.15) | 1.11 (0.82 to 1.53) |
| 3650 | 63 | 57 | 698.7 (660.2 to 739.4) | 729.6 (688.5 to 772.1) | 30.9 (-28.5 to 85.8) | 1.04 (0.96 to 1.13) | 0.91 (0.62 to 1.27) |
| 4015 | 41 | 32 | 786.6 (742.9 to 835.3) | 798.9 (753.1 to 842.9) | 12.3 (-53.9 to 74.1) | 1.02 (0.93 to 1.10) | 0.79 (0.44 to 1.30) |
| 4380 | 20 | 26 | 864.2 (809.8 to 920.6) | 900.7 (835.8 to 965.0) | 36.4 (-42.6 to 117.6) | 1.04 (0.95 to 1.14) | 1.31 (0.75 to 2.62) |
| 4745 | 10 | 4 | 982.6 (887.6 to 1084.4) | 940.6 (868.6 to 1027.7) | -42.0 (-166.4 to 81.8) | 0.96 (0.85 to 1.09) | *** |
| 5110 | 2 | 1 | 1027.2 (917.5 to 1143.3) | 968.3 (876.2 to 1078.1) | -58.8 (-199.8 to 86.3) | 0.94 (0.82 to 1.10) | *** |
| **Cause: Endocrine** | | | | | | | |
| 30 | 4 | 6 | 0.9 (0.2 to 1.8) | 1.3 (0.4 to 2.5) | 0.4 (-0.9 to 1.8) | *** | *** |
| 90 | 10 | 4 | 3.2 (1.6 to 5.0) | 2.3 (0.9 to 3.8) | -0.9 (-3.2 to 1.1) | *** | *** |
| 180 | 12 | 16 | 6.0 (3.7 to 8.3) | 6.0 (3.7 to 8.3) | 0.0 (-3.2 to 3.3) | 1.00 (0.55 to 1.83) | 1.33 (0.59 to 3.00) |
| 365 | 30 | 30 | 13.4 (10.1 to 17.0) | 13.5 (10.1 to 17.2) | 0.1 (-5.0 to 5.3) | 1.00 (0.68 to 1.48) | 1.00 (0.58 to 1.65) |
| 730 | 44 | 49 | 25.5 (20.5 to 30.7) | 26.8 (21.8 to 31.8) | 1.3 (-6.4 to 8.0) | 1.05 (0.78 to 1.36) | 1.11 (0.73 to 1.69) |
| 1095 | 44 | 41 | 39.4 (33.0 to 46.3) | 39.9 (33.3 to 47.1) | 0.4 (-8.7 to 9.9) | 1.01 (0.79 to 1.28) | 0.93 (0.60 to 1.49) |
| 1460 | 32 | 40 | 51.2 (44.4 to 59.1) | 54.6 (46.7 to 62.8) | 3.4 (-7.6 to 14.2) | 1.07 (0.87 to 1.31) | 1.25 (0.79 to 2.00) |
| 1825 | 40 | 31 | 68.5 (60.0 to 77.9) | 68.0 (59.4 to 77.5) | -0.5 (-13.2 to 12.5) | 0.99 (0.82 to 1.20) | 0.78 (0.47 to 1.22) |
| 2190 | 31 | 39 | 84.5 (73.6 to 95.7) | 87.7 (76.8 to 99.6) | 3.1 (-11.7 to 19.1) | 1.04 (0.87 to 1.25) | 1.26 (0.79 to 2.07) |
| 2555 | 26 | 21 | 100.9 (88.3 to 113.4) | 100.9 (88.9 to 113.3) | 0.0 (-17.3 to 18.4) | 1.00 (0.84 to 1.20) | 0.81 (0.45 to 1.48) |
| 2920 | 23 | 21 | 119.4 (104.3 to 134.7) | 117.4 (103.9 to 132.9) | -2.0 (-21.9 to 19.4) | 0.98 (0.83 to 1.18) | 0.92 (0.47 to 1.70) |
| 3285 | 20 | 10 | 139.9 (123.0 to 158.5) | 127.5 (111.3 to 144.1) | -12.4 (-36.6 to 10.1) | 0.91 (0.76 to 1.08) | 0.50 (0.17 to 1.06) |
| 3650 | 11 | 11 | 155.1 (135.5 to 175.3) | 143.2 (125.0 to 161.8) | -11.9 (-38.8 to 13.5) | 0.92 (0.77 to 1.10) | 1.01 (0.39 to 2.35) |
| 4015 | 4 | 11 | 163.6 (142.9 to 187.3) | 166.0 (141.9 to 188.2) | 2.3 (-30.9 to 32.1) | 1.01 (0.82 to 1.21) | *** |
| 4380 | 3 | 5 | 176.9 (151.2 to 204.1) | 187.5 (158.7 to 217.5) | 10.6 (-27.3 to 48.0) | 1.06 (0.86 to 1.31) | *** |
| 4745 | 1 | 0 | 186.6 (156.0 to 222.2) | 187.5 (158.7 to 217.5) | 0.8 (-43.2 to 43.5) | 1.00 (0.80 to 1.27) | *** |
| 5110 | 4 | 0 | 332.4 (204.2 to 529.5) | 187.5 (158.7 to 217.5) | -144.9 (-343.9 to -11.4) | 0.56 (0.35 to 0.95) | *** |
| **Cause: Respiratory** | | | | | | | |
| 30 | 11 | 11 | 2.5 (1.1 to 3.9) | 2.5 (1.1 to 3.9) | 0.0 (-2.0 to 2.0) | 1.00 (0.40 to 2.34) | 1.00 (0.40 to 2.33) |
| 90 | 19 | 23 | 6.8 (4.4 to 9.3) | 7.7 (5.4 to 10.1) | 0.9 (-2.7 to 4.4) | 1.13 (0.71 to 1.89) | 1.21 (0.65 to 2.52) |
| 180 | 27 | 26 | 13.1 (9.7 to 16.8) | 13.8 (10.6 to 17.5) | 0.7 (-3.9 to 5.8) | 1.05 (0.74 to 1.55) | 0.96 (0.57 to 1.72) |
| 365 | 52 | 60 | 26.0 (20.8 to 31.0) | 28.7 (24.2 to 33.4) | 2.7 (-4.4 to 9.6) | 1.10 (0.85 to 1.47) | 1.15 (0.78 to 1.72) |
| 730 | 81 | 110 | 48.3 (41.6 to 55.0) | 58.9 (51.7 to 65.7) | 10.6 (0.3 to 22.3) | 1.22 (1.01 to 1.51) | 1.36 (1.01 to 1.84) |
| 1095 | 73 | 80 | 71.3 (62.8 to 80.9) | 84.1 (76.2 to 93.2) | 12.8 (-0.0 to 26.7) | 1.18 (1.00 to 1.41) | 1.10 (0.84 to 1.49) |
| 1460 | 52 | 89 | 90.5 (81.1 to 100.8) | 116.7 (106.3 to 128.2) | 26.2 (11.8 to 41.2) | 1.29 (1.12 to 1.49) | 1.72 (1.24 to 2.41) |
| 1825 | 59 | 63 | 116.3 (104.5 to 128.6) | 143.7 (132.0 to 157.2) | 27.4 (11.4 to 44.0) | 1.24 (1.09 to 1.42) | 1.07 (0.75 to 1.54) |
| 2190 | 46 | 55 | 140.1 (128.2 to 154.6) | 171.9 (157.1 to 188.7) | 31.8 (11.5 to 50.9) | 1.23 (1.08 to 1.38) | 1.20 (0.83 to 1.82) |
| 2555 | 33 | 44 | 160.6 (146.5 to 176.2) | 199.6 (183.9 to 216.8) | 39.1 (17.0 to 60.7) | 1.24 (1.10 to 1.41) | 1.34 (0.87 to 2.10) |
| 2920 | 22 | 39 | 178.2 (161.4 to 195.8) | 230.6 (212.1 to 250.8) | 52.4 (29.8 to 77.5) | 1.29 (1.15 to 1.46) | 1.78 (1.07 to 3.29) |
| 3285 | 19 | 43 | 197.4 (177.1 to 216.9) | 275.0 (252.2 to 298.2) | 77.6 (48.7 to 108.2) | 1.39 (1.24 to 1.59) | 2.27 (1.38 to 3.99) |
| 3650 | 29 | 26 | 239.4 (216.7 to 264.4) | 311.5 (285.5 to 337.8) | 72.1 (35.7 to 106.8) | 1.30 (1.14 to 1.48) | 0.90 (0.52 to 1.47) |
| 4015 | 10 | 12 | 260.4 (233.9 to 288.3) | 338.2 (308.5 to 367.3) | 77.8 (37.5 to 115.1) | 1.30 (1.13 to 1.48) | 1.21 (0.55 to 3.58) |
| 4380 | 3 | 7 | 272.1 (242.8 to 303.5) | 366.5 (332.5 to 400.8) | 94.4 (48.8 to 139.8) | 1.35 (1.16 to 1.55) | *** |
| 4745 | 2 | 6 | 291.4 (255.9 to 336.7) | 426.2 (368.3 to 491.4) | 134.9 (65.3 to 211.6) | 1.46 (1.21 to 1.79) | *** |
| 5110 | 0 | 0 | 291.4 (255.9 to 336.7) | 426.2 (368.3 to 491.4) | 134.9 (65.3 to 211.6) | 1.46 (1.21 to 1.79) | *** |
| **Cause: External** | | | | | | | |
| 30 | 26 | 34 | 5.8 (3.8 to 8.3) | 7.6 (5.0 to 10.4) | 1.8 (-1.7 to 5.3) | 1.31 (0.78 to 2.29) | 1.31 (0.78 to 2.29) |
| 90 | 62 | 81 | 20.0 (16.3 to 24.5) | 26.1 (21.2 to 31.5) | 6.1 (-0.4 to 12.0) | 1.31 (0.98 to 1.70) | 1.31 (0.93 to 1.87) |
| 180 | 66 | 99 | 35.5 (30.3 to 42.0) | 49.3 (42.7 to 55.9) | 13.8 (4.6 to 22.4) | 1.39 (1.11 to 1.70) | 1.50 (1.11 to 2.10) |
| 365 | 162 | 248 | 75.5 (67.2 to 84.9) | 110.7 (100.8 to 121.1) | 35.1 (20.7 to 47.7) | 1.47 (1.26 to 1.69) | 1.53 (1.28 to 1.88) |
| 730 | 297 | 378 | 157.2 (144.1 to 169.3) | 214.6 (200.1 to 229.5) | 57.4 (37.7 to 76.6) | 1.37 (1.22 to 1.51) | 1.27 (1.09 to 1.50) |
| 1095 | 244 | 343 | 234.8 (218.9 to 250.9) | 323.1 (305.1 to 341.3) | 88.4 (62.6 to 112.7) | 1.38 (1.26 to 1.50) | 1.41 (1.21 to 1.65) |
| 1460 | 254 | 300 | 328.5 (309.8 to 347.2) | 433.3 (411.9 to 457.4) | 104.8 (75.6 to 138.8) | 1.32 (1.22 to 1.44) | 1.18 (1.00 to 1.40) |
| 1825 | 212 | 253 | 420.2 (398.1 to 445.9) | 542.8 (515.1 to 571.4) | 122.6 (88.0 to 157.2) | 1.29 (1.20 to 1.39) | 1.20 (0.99 to 1.42) |
| 2190 | 172 | 227 | 509.7 (484.0 to 536.0) | 659.8 (630.4 to 693.2) | 150.2 (112.5 to 188.7) | 1.29 (1.21 to 1.38) | 1.32 (1.10 to 1.62) |
| 2555 | 173 | 180 | 618.6 (588.9 to 649.4) | 774.3 (738.4 to 810.9) | 155.6 (106.6 to 201.7) | 1.25 (1.17 to 1.34) | 1.04 (0.85 to 1.28) |
| 2920 | 136 | 138 | 726.7 (691.6 to 762.0) | 884.5 (846.3 to 928.6) | 157.7 (104.2 to 211.1) | 1.22 (1.14 to 1.30) | 1.02 (0.82 to 1.25) |
| 3285 | 118 | 119 | 848.5 (807.3 to 888.2) | 1007.5 (957.2 to 1053.8) | 159.0 (96.9 to 221.0) | 1.19 (1.11 to 1.27) | 1.01 (0.79 to 1.29) |
| 3650 | 89 | 105 | 973.9 (926.1 to 1026.4) | 1154.8 (1098.9 to 1209.2) | 180.9 (104.6 to 251.1) | 1.19 (1.10 to 1.27) | 1.19 (0.89 to 1.59) |
| 4015 | 56 | 67 | 1096.0 (1038.0 to 1157.0) | 1293.5 (1222.2 to 1354.5) | 197.5 (101.6 to 285.0) | 1.18 (1.09 to 1.27) | 1.20 (0.88 to 1.73) |
| 4380 | 38 | 32 | 1241.3 (1159.1 to 1312.6) | 1426.7 (1344.0 to 1508.5) | 185.5 (78.1 to 299.4) | 1.15 (1.06 to 1.25) | 0.85 (0.54 to 1.40) |
| 4745 | 10 | 13 | 1325.6 (1231.4 to 1421.3) | 1544.1 (1435.5 to 1664.5) | 218.5 (77.4 to 377.6) | 1.16 (1.06 to 1.29) | 1.31 (0.54 to 3.35) |
| 5110 | 5 | 7 | 1471.5 (1322.6 to 1632.2) | 1714.3 (1549.6 to 1891.4) | 242.8 (-4.7 to 475.4) | 1.16 (1.00 to 1.34) | *** |

*** IRR/RR was not estimated when there were fewer than 20 events in the risk period or fewer than 5 events in one group.

# Supplementary Table 6. Estimated risk of death by cause-specific (defined by ICD-10 blocks) comparing diagnosed Tuberculosis cases compared to non-exposed controls.

|  | **Number of events** | | **Risk per 100,000** | |  |  |  |
| --- | --- | --- | --- | --- | --- | --- | --- |
| **Time - Days** | **Unexposed** | **Exposed** | **Unexposed** | **Exposed** | **Risk difference per 100,000 - 95% CI** | **Risk ratio - 95% CI** | **Incidence rate ratio - 95% CI** |
| **Cause: Cancer Respiratory** | | | | | | | |
| 30 | 1 | 96 | 0.5 (0.0 to 1.6) | 51.8 (41.8 to 63.4) | 51.3 (41.3 to 63.4) | *** | *** |
| 90 | 2 | 141 | 1.6 (0.0 to 3.8) | 129.3 (113.8 to 145.8) | 127.6 (111.8 to 143.6) | *** | *** |
| 180 | 4 | 92 | 3.9 (1.1 to 6.7) | 181.3 (163.9 to 201.3) | 177.4 (159.0 to 196.9) | 46.35 (26.96 to 156.92) | *** |
| 365 | 5 | 140 | 6.9 (3.4 to 10.6) | 265.0 (244.6 to 291.7) | 258.1 (237.5 to 285.2) | 38.36 (25.02 to 80.07) | 29.71 (15.74 to 145.83) |
| 730 | 13 | 131 | 15.6 (9.5 to 21.6) | 351.2 (326.6 to 380.4) | 335.7 (310.1 to 363.9) | 22.56 (16.05 to 37.23) | 10.84 (6.47 to 23.01) |
| 1095 | 14 | 61 | 26.6 (18.6 to 35.0) | 397.9 (371.7 to 429.1) | 371.3 (342.8 to 406.1) | 14.97 (11.19 to 21.87) | 4.75 (2.73 to 9.13) |
| 1460 | 13 | 39 | 37.9 (27.5 to 48.9) | 432.8 (404.8 to 468.7) | 394.9 (364.2 to 434.0) | 11.41 (8.95 to 16.14) | 3.30 (1.90 to 7.54) |
| 1825 | 13 | 37 | 51.6 (39.0 to 64.0) | 471.6 (441.1 to 507.9) | 420.0 (384.6 to 459.4) | 9.14 (7.26 to 12.24) | 3.16 (1.73 to 6.97) |
| 2190 | 11 | 36 | 65.3 (51.3 to 79.8) | 516.4 (483.6 to 553.9) | 451.1 (412.3 to 491.3) | 7.91 (6.34 to 10.25) | 3.67 (1.96 to 8.13) |
| 2555 | 9 | 18 | 79.0 (62.2 to 97.5) | 543.7 (507.0 to 586.9) | 464.7 (419.8 to 511.5) | 6.88 (5.42 to 8.68) | 2.26 (0.98 to 5.94) |
| 2920 | 8 | 14 | 95.1 (74.7 to 117.6) | 570.5 (532.1 to 617.5) | 475.4 (427.0 to 524.0) | 6.00 (4.79 to 7.60) | 1.99 (0.88 to 5.28) |
| 3285 | 5 | 14 | 108.2 (85.5 to 133.3) | 606.3 (559.8 to 656.2) | 498.1 (444.5 to 550.9) | 5.60 (4.47 to 7.22) | *** |
| 3650 | 6 | 12 | 128.7 (101.5 to 158.3) | 649.2 (599.5 to 701.4) | 520.6 (461.5 to 584.7) | 5.05 (3.99 to 6.53) | *** |
| 4015 | 3 | 5 | 143.7 (112.6 to 177.8) | 676.7 (622.3 to 738.6) | 533.0 (465.1 to 603.0) | 4.71 (3.72 to 6.06) | *** |
| 4380 | 3 | 6 | 178.2 (131.7 to 229.7) | 739.2 (672.1 to 825.2) | 561.0 (474.1 to 657.4) | 4.15 (3.18 to 5.78) | *** |
| 4745 | 0 | 2 | 178.2 (131.7 to 229.7) | 780.6 (694.5 to 885.7) | 602.4 (489.8 to 712.6) | 4.38 (3.27 to 6.03) | *** |
| 5110 | 0 | 0 | 178.2 (131.7 to 229.7) | 780.6 (694.5 to 885.7) | 602.4 (489.8 to 712.6) | 4.38 (3.27 to 6.03) | *** |
| **Cause: Cancer Digestive Organs** | | | | | | | |
| 30 | 4 | 33 | 2.2 (0.5 to 4.3) | 17.8 (11.9 to 23.8) | 15.7 (9.2 to 21.6) | *** | *** |
| 90 | 7 | 43 | 6.0 (2.7 to 9.3) | 41.4 (31.5 to 51.0) | 35.4 (24.5 to 44.8) | 6.88 (4.05 to 15.96) | 6.37 (3.27 to 22.56) |
| 180 | 8 | 46 | 10.6 (6.6 to 15.1) | 67.5 (55.4 to 79.1) | 56.9 (43.7 to 68.9) | 6.38 (4.18 to 10.70) | 6.03 (3.21 to 16.16) |
| 365 | 19 | 70 | 22.0 (15.5 to 29.0) | 109.3 (93.2 to 123.7) | 87.3 (68.9 to 102.6) | 4.97 (3.60 to 6.96) | 3.91 (2.45 to 6.50) |
| 730 | 38 | 85 | 47.3 (37.5 to 58.5) | 165.7 (147.9 to 184.1) | 118.4 (96.7 to 139.7) | 3.50 (2.71 to 4.59) | 2.41 (1.73 to 3.70) |
| 1095 | 28 | 62 | 69.0 (56.6 to 81.8) | 214.1 (189.7 to 236.6) | 145.1 (118.9 to 171.3) | 3.10 (2.50 to 4.00) | 2.41 (1.58 to 3.93) |
| 1460 | 44 | 47 | 108.8 (91.9 to 127.0) | 256.3 (229.0 to 283.7) | 147.5 (112.1 to 180.2) | 2.36 (1.92 to 2.89) | 1.17 (0.78 to 1.78) |
| 1825 | 23 | 59 | 133.2 (113.8 to 155.9) | 317.9 (287.2 to 348.8) | 184.7 (144.9 to 222.5) | 2.39 (1.97 to 2.85) | 2.85 (1.77 to 4.80) |
| 2190 | 19 | 38 | 156.8 (133.9 to 182.8) | 365.1 (329.2 to 400.9) | 208.3 (161.8 to 252.5) | 2.33 (1.94 to 2.83) | 2.24 (1.33 to 4.26) |
| 2555 | 15 | 26 | 180.0 (153.3 to 204.3) | 404.8 (365.2 to 443.1) | 224.8 (176.5 to 272.7) | 2.25 (1.90 to 2.71) | 1.96 (1.06 to 3.93) |
| 2920 | 15 | 26 | 209.3 (178.4 to 238.8) | 455.1 (411.4 to 495.8) | 245.8 (191.2 to 299.0) | 2.17 (1.85 to 2.63) | 1.98 (1.14 to 4.08) |
| 3285 | 7 | 21 | 227.3 (192.7 to 260.6) | 508.2 (457.9 to 556.1) | 280.9 (218.8 to 337.3) | 2.24 (1.90 to 2.67) | 3.45 (1.54 to 11.47) |
| 3650 | 8 | 14 | 255.8 (217.0 to 292.6) | 557.5 (504.2 to 616.5) | 301.7 (237.2 to 368.1) | 2.18 (1.83 to 2.63) | 2.02 (0.91 to 6.80) |
| 4015 | 7 | 8 | 294.0 (249.6 to 342.6) | 599.1 (535.6 to 658.0) | 305.1 (234.5 to 383.5) | 2.04 (1.69 to 2.48) | *** |
| 4380 | 5 | 8 | 340.7 (280.4 to 404.2) | 667.0 (587.7 to 738.7) | 326.3 (231.0 to 417.5) | 1.96 (1.61 to 2.48) | *** |
| 4745 | 1 | 1 | 357.1 (286.2 to 426.0) | 704.1 (600.0 to 810.6) | 347.0 (225.8 to 470.9) | 1.97 (1.55 to 2.57) | *** |
| 5110 | 0 | 0 | 357.1 (286.2 to 426.0) | 704.1 (600.0 to 810.6) | 347.0 (225.8 to 470.9) | 1.97 (1.55 to 2.57) | *** |
| **Cause: Ischemic heart diseases** | | | | | | | |
| 30 | 3 | 39 | 1.6 (0.0 to 3.8) | 21.0 (14.6 to 28.6) | 19.4 (13.0 to 27.3) | *** | *** |
| 90 | 12 | 34 | 8.2 (4.4 to 12.6) | 39.7 (31.5 to 48.7) | 31.5 (21.7 to 41.8) | 4.83 (2.91 to 9.41) | 2.94 (1.59 to 5.70) |
| 180 | 18 | 44 | 18.4 (12.3 to 25.1) | 64.7 (53.1 to 77.4) | 46.2 (33.0 to 59.4) | 3.51 (2.43 to 5.27) | 2.57 (1.51 to 4.79) |
| 365 | 33 | 41 | 38.2 (29.0 to 48.1) | 89.2 (74.7 to 103.7) | 50.9 (34.0 to 68.2) | 2.33 (1.77 to 3.20) | 1.32 (0.81 to 2.04) |
| 730 | 62 | 112 | 79.4 (65.9 to 92.4) | 163.2 (144.6 to 184.1) | 83.8 (59.8 to 106.8) | 2.06 (1.66 to 2.52) | 1.94 (1.44 to 2.70) |
| 1095 | 68 | 86 | 131.7 (114.1 to 149.0) | 229.2 (204.4 to 256.3) | 97.6 (68.0 to 127.5) | 1.74 (1.48 to 2.08) | 1.38 (1.04 to 1.94) |
| 1460 | 56 | 75 | 182.1 (159.2 to 203.4) | 296.8 (267.6 to 327.4) | 114.6 (78.6 to 151.9) | 1.63 (1.40 to 1.91) | 1.47 (1.05 to 2.14) |
| 1825 | 43 | 64 | 227.4 (200.9 to 254.3) | 364.4 (332.0 to 397.6) | 137.0 (97.3 to 181.6) | 1.60 (1.39 to 1.87) | 1.65 (1.07 to 2.44) |
| 2190 | 39 | 48 | 276.2 (247.1 to 305.6) | 424.7 (386.8 to 460.2) | 148.5 (99.2 to 195.8) | 1.54 (1.34 to 1.77) | 1.38 (0.94 to 2.08) |
| 2555 | 44 | 38 | 344.4 (307.2 to 379.7) | 483.6 (443.0 to 525.5) | 139.2 (83.3 to 194.1) | 1.40 (1.23 to 1.61) | 0.98 (0.64 to 1.54) |
| 2920 | 19 | 38 | 382.6 (340.9 to 420.8) | 558.5 (512.2 to 605.8) | 175.9 (114.7 to 237.4) | 1.46 (1.28 to 1.68) | 2.28 (1.44 to 4.26) |
| 3285 | 16 | 23 | 424.3 (377.8 to 465.9) | 617.6 (563.9 to 672.7) | 193.3 (123.2 to 267.8) | 1.46 (1.27 to 1.67) | 1.65 (0.81 to 3.35) |
| 3650 | 15 | 16 | 477.3 (426.2 to 524.1) | 673.4 (616.5 to 731.3) | 196.1 (116.9 to 273.6) | 1.41 (1.23 to 1.63) | 1.23 (0.57 to 2.81) |
| 4015 | 6 | 11 | 504.2 (448.5 to 557.1) | 733.8 (666.1 to 804.6) | 229.6 (143.6 to 311.0) | 1.46 (1.26 to 1.67) | *** |
| 4380 | 8 | 11 | 583.1 (505.9 to 666.4) | 846.8 (755.6 to 941.4) | 263.7 (134.9 to 395.2) | 1.45 (1.22 to 1.75) | *** |
| 4745 | 4 | 2 | 675.7 (563.6 to 802.3) | 881.8 (777.5 to 994.5) | 206.2 (43.0 to 365.5) | 1.31 (1.06 to 1.62) | *** |
| 5110 | 0 | 1 | 675.7 (563.6 to 802.3) | 992.2 (800.4 to 1256.6) | 316.5 (68.3 to 618.1) | 1.47 (1.09 to 1.98) | *** |
| **Cause: Cerebrovascular diseases** | | | | | | | |
| 30 | 5 | 42 | 2.7 (0.5 to 5.4) | 22.7 (16.2 to 29.7) | 20.0 (12.9 to 27.5) | 8.39 (3.67 to 39.52) | 8.54 (3.73 to 40.20) |
| 90 | 11 | 36 | 8.7 (4.9 to 13.1) | 42.4 (33.2 to 52.0) | 33.7 (23.9 to 44.5) | 4.85 (2.93 to 9.77) | 3.39 (1.93 to 8.08) |
| 180 | 18 | 30 | 18.9 (13.3 to 25.1) | 59.4 (48.4 to 70.7) | 40.5 (27.5 to 53.0) | 3.14 (2.21 to 4.58) | 1.75 (1.05 to 3.32) |
| 365 | 42 | 51 | 44.0 (35.6 to 54.0) | 89.6 (75.3 to 102.4) | 45.6 (29.3 to 62.5) | 2.04 (1.57 to 2.71) | 1.29 (0.86 to 1.96) |
| 730 | 51 | 67 | 78.0 (64.4 to 91.7) | 134.3 (117.2 to 152.3) | 56.3 (35.2 to 78.1) | 1.72 (1.39 to 2.17) | 1.41 (1.00 to 2.12) |
| 1095 | 56 | 65 | 120.7 (103.0 to 138.4) | 184.4 (163.1 to 206.2) | 63.7 (36.0 to 93.9) | 1.53 (1.28 to 1.89) | 1.26 (0.89 to 1.79) |
| 1460 | 57 | 54 | 172.0 (148.8 to 195.1) | 232.5 (207.9 to 256.3) | 60.4 (29.3 to 94.0) | 1.35 (1.15 to 1.61) | 1.04 (0.68 to 1.45) |
| 1825 | 39 | 37 | 212.6 (185.6 to 238.2) | 271.0 (243.4 to 301.1) | 58.4 (21.4 to 95.1) | 1.27 (1.09 to 1.50) | 1.05 (0.71 to 1.57) |
| 2190 | 41 | 40 | 264.7 (233.5 to 294.8) | 321.5 (290.3 to 358.3) | 56.9 (15.9 to 101.8) | 1.21 (1.06 to 1.41) | 1.09 (0.73 to 1.70) |
| 2555 | 25 | 34 | 304.5 (267.3 to 339.5) | 374.3 (338.3 to 413.5) | 69.8 (21.8 to 119.2) | 1.23 (1.07 to 1.43) | 1.54 (0.95 to 2.67) |
| 2920 | 25 | 22 | 353.1 (314.1 to 393.9) | 417.2 (378.6 to 459.2) | 64.1 (10.9 to 120.0) | 1.18 (1.03 to 1.37) | 1.00 (0.55 to 1.81) |
| 3285 | 21 | 14 | 408.5 (362.6 to 454.9) | 453.1 (414.2 to 502.6) | 44.6 (-18.0 to 108.9) | 1.11 (0.96 to 1.28) | 0.77 (0.37 to 1.41) |
| 3650 | 20 | 13 | 477.1 (425.1 to 530.4) | 500.5 (450.8 to 551.5) | 23.4 (-42.7 to 95.7) | 1.05 (0.92 to 1.22) | 0.75 (0.39 to 1.52) |
| 4015 | 9 | 10 | 524.0 (462.3 to 583.4) | 552.2 (492.4 to 609.0) | 28.2 (-51.6 to 114.3) | 1.05 (0.91 to 1.24) | *** |
| 4380 | 6 | 10 | 586.1 (510.6 to 672.7) | 647.6 (564.3 to 734.3) | 61.6 (-46.7 to 183.5) | 1.11 (0.93 to 1.34) | *** |
| 4745 | 1 | 1 | 603.2 (528.0 to 688.9) | 690.7 (587.5 to 819.3) | 87.5 (-51.4 to 245.1) | 1.14 (0.92 to 1.45) | *** |
| 5110 | 0 | 0 | 603.2 (528.0 to 688.9) | 690.7 (587.5 to 819.3) | 87.5 (-51.4 to 245.1) | 1.14 (0.92 to 1.45) | *** |
| **Cause: Accidents** | | | | | | | |
| 30 | 12 | 20 | 6.5 (3.2 to 10.3) | 10.8 (6.5 to 15.7) | 4.3 (-2.2 to 10.2) | 1.66 (0.80 to 3.93) | 1.70 (0.81 to 4.01) |
| 90 | 16 | 18 | 15.3 (9.9 to 20.8) | 20.7 (13.6 to 27.8) | 5.4 (-2.7 to 14.9) | 1.35 (0.86 to 2.36) | 1.17 (0.57 to 2.38) |
| 180 | 12 | 16 | 22.1 (16.0 to 29.2) | 29.8 (22.6 to 38.5) | 7.7 (-2.1 to 18.8) | 1.35 (0.93 to 2.10) | 1.40 (0.64 to 3.22) |
| 365 | 37 | 53 | 44.2 (34.9 to 53.6) | 61.6 (49.5 to 74.3) | 17.3 (2.0 to 32.5) | 1.39 (1.04 to 1.89) | 1.52 (1.01 to 2.38) |
| 730 | 59 | 96 | 83.5 (70.6 to 96.6) | 125.4 (106.3 to 141.9) | 41.8 (19.2 to 63.3) | 1.50 (1.22 to 1.85) | 1.75 (1.27 to 2.38) |
| 1095 | 52 | 79 | 123.3 (105.9 to 140.9) | 186.5 (164.5 to 207.7) | 63.1 (36.5 to 90.9) | 1.51 (1.27 to 1.81) | 1.66 (1.14 to 2.55) |
| 1460 | 39 | 58 | 158.2 (139.5 to 179.2) | 237.8 (211.2 to 263.1) | 79.7 (47.2 to 113.6) | 1.50 (1.27 to 1.78) | 1.64 (1.10 to 2.54) |
| 1825 | 51 | 48 | 211.1 (188.2 to 238.8) | 288.0 (258.3 to 319.4) | 76.9 (35.9 to 117.9) | 1.36 (1.16 to 1.61) | 1.04 (0.69 to 1.53) |
| 2190 | 21 | 49 | 237.6 (210.5 to 268.9) | 349.6 (313.3 to 386.8) | 112.0 (63.9 to 156.2) | 1.47 (1.25 to 1.73) | 2.61 (1.59 to 4.56) |
| 2555 | 33 | 35 | 288.9 (256.3 to 326.3) | 404.3 (364.7 to 446.4) | 115.4 (61.8 to 164.7) | 1.40 (1.19 to 1.62) | 1.20 (0.71 to 2.01) |
| 2920 | 21 | 26 | 331.0 (293.8 to 371.8) | 455.8 (411.4 to 501.7) | 124.8 (62.7 to 182.3) | 1.38 (1.17 to 1.59) | 1.41 (0.78 to 2.54) |
| 3285 | 14 | 15 | 367.9 (327.4 to 414.3) | 492.3 (443.9 to 541.9) | 124.4 (58.5 to 190.6) | 1.34 (1.15 to 1.56) | 1.23 (0.57 to 2.77) |
| 3650 | 7 | 10 | 392.7 (348.4 to 439.5) | 527.0 (472.6 to 578.0) | 134.4 (63.4 to 203.5) | 1.34 (1.14 to 1.56) | *** |
| 4015 | 5 | 3 | 421.6 (369.5 to 477.6) | 542.8 (489.2 to 599.9) | 121.3 (43.7 to 201.1) | 1.29 (1.09 to 1.52) | *** |
| 4380 | 2 | 4 | 438.0 (381.4 to 501.5) | 574.8 (513.6 to 645.6) | 136.8 (56.6 to 224.8) | 1.31 (1.11 to 1.57) | *** |
| 4745 | 2 | 3 | 473.1 (401.3 to 547.8) | 629.4 (550.5 to 726.1) | 156.3 (44.1 to 276.8) | 1.33 (1.08 to 1.65) | *** |
| 5110 | 0 | 1 | 473.1 (401.3 to 547.8) | 763.5 (563.7 to 1043.4) | 290.3 (83.1 to 583.1) | 1.61 (1.17 to 2.38) | *** |
| **Cause: Assault** | | | | | | | |
| 30 | 13 | 23 | 7.0 (3.2 to 10.8) | 12.4 (8.1 to 17.6) | 5.4 (-0.6 to 12.4) | 1.77 (0.94 to 4.09) | 1.80 (0.96 to 4.16) |
| 90 | 24 | 39 | 20.2 (13.9 to 26.8) | 33.8 (25.6 to 42.0) | 13.6 (3.3 to 23.7) | 1.67 (1.13 to 2.54) | 1.68 (1.05 to 2.89) |
| 180 | 26 | 109 | 35.0 (26.3 to 43.4) | 95.6 (81.6 to 108.7) | 60.6 (45.2 to 76.5) | 2.73 (2.08 to 3.74) | 4.40 (2.93 to 7.09) |
| 365 | 66 | 190 | 74.4 (62.3 to 86.5) | 209.4 (188.2 to 231.2) | 135.0 (109.1 to 159.8) | 2.81 (2.30 to 3.45) | 3.05 (2.30 to 4.06) |
| 730 | 96 | 324 | 138.1 (120.8 to 155.5) | 424.7 (394.6 to 457.1) | 286.6 (248.4 to 323.0) | 3.07 (2.64 to 3.59) | 3.63 (2.87 to 4.69) |
| 1095 | 91 | 211 | 208.1 (186.4 to 230.4) | 586.4 (551.3 to 625.9) | 378.4 (330.8 to 420.5) | 2.82 (2.46 to 3.20) | 2.53 (1.95 to 3.23) |
| 1460 | 81 | 167 | 280.4 (253.6 to 308.1) | 736.7 (696.6 to 781.8) | 456.3 (408.5 to 507.3) | 2.63 (2.35 to 2.94) | 2.27 (1.78 to 2.99) |
| 1825 | 48 | 144 | 331.0 (300.9 to 364.1) | 887.9 (837.8 to 937.5) | 557.0 (494.0 to 619.4) | 2.68 (2.39 to 3.01) | 3.33 (2.45 to 4.79) |
| 2190 | 37 | 99 | 377.4 (344.7 to 412.8) | 1012.6 (961.4 to 1062.8) | 635.2 (569.6 to 697.3) | 2.68 (2.41 to 2.97) | 3.00 (2.10 to 4.55) |
| 2555 | 31 | 72 | 425.1 (388.4 to 463.5) | 1123.7 (1065.7 to 1185.0) | 698.6 (627.8 to 766.8) | 2.64 (2.40 to 2.95) | 2.63 (1.76 to 4.27) |
| 2920 | 30 | 56 | 484.1 (441.8 to 530.7) | 1230.9 (1163.2 to 1297.8) | 746.9 (663.8 to 818.5) | 2.54 (2.27 to 2.83) | 2.13 (1.36 to 3.43) |
| 3285 | 19 | 46 | 533.3 (482.5 to 588.4) | 1347.4 (1273.4 to 1422.6) | 814.2 (715.1 to 897.6) | 2.53 (2.24 to 2.82) | 2.78 (1.70 to 4.77) |
| 3650 | 16 | 21 | 589.8 (536.9 to 655.2) | 1417.5 (1333.0 to 1496.7) | 827.7 (715.7 to 921.0) | 2.40 (2.10 to 2.67) | 1.52 (0.73 to 3.21) |
| 4015 | 8 | 14 | 634.2 (569.5 to 701.6) | 1494.1 (1403.9 to 1583.0) | 859.9 (744.4 to 969.8) | 2.36 (2.07 to 2.66) | 2.04 (0.91 to 6.59) |
| 4380 | 4 | 4 | 671.3 (598.1 to 747.2) | 1531.9 (1434.0 to 1628.0) | 860.6 (737.5 to 983.5) | 2.28 (2.02 to 2.60) | *** |
| 4745 | 2 | 2 | 709.8 (623.6 to 808.4) | 1614.3 (1470.6 to 1791.2) | 904.4 (732.9 to 1085.2) | 2.27 (1.95 to 2.66) | *** |
| 5110 | 0 | 0 | 709.8 (623.6 to 808.4) | 1614.3 (1470.6 to 1791.2) | 904.4 (732.9 to 1085.2) | 2.27 (1.95 to 2.66) | *** |

# Supplementary Table 7. Estimated risk of death by cause-specific (defined by ICD-10 blocks) comparing treated Tuberculosis cases compared to non-exposed controls.

|  | **Number of events** | | **Risk per 100,000** | |  |  |  |
| --- | --- | --- | --- | --- | --- | --- | --- |
| **Time - Days** | **Unexposed** | **Exposed** | **Unexposed** | **Exposed** | **Risk difference per 100,000 - 95% CI** | **Risk ratio - 95% CI** | **Incidence rate ratio - 95% CI** |
| **Cause: Cancer Respiratory** | | | | | | | |
| 30 | 1 | 12 | 0.9 (0.0 to 3.6) | 10.8 (4.5 to 17.1) | 9.9 (3.6 to 16.2) | *** | *** |
| 90 | 0 | 27 | 0.9 (0.0 to 3.6) | 35.5 (23.8 to 47.4) | 34.6 (22.8 to 46.5) | *** | *** |
| 180 | 3 | 30 | 3.7 (0.9 to 7.9) | 63.8 (49.5 to 79.6) | 60.1 (45.5 to 76.5) | *** | *** |
| 365 | 3 | 44 | 6.8 (1.9 to 12.4) | 107.7 (87.8 to 127.9) | 100.9 (80.5 to 120.6) | 15.90 (8.21 to 55.80) | *** |
| 730 | 8 | 57 | 15.8 (8.5 to 24.1) | 171.5 (146.8 to 197.4) | 155.8 (129.4 to 183.7) | 10.89 (6.98 to 20.99) | 7.25 (3.74 to 20.53) |
| 1095 | 15 | 30 | 35.4 (22.9 to 49.0) | 211.0 (181.3 to 239.5) | 175.6 (144.6 to 207.3) | 5.96 (4.21 to 9.42) | 2.05 (1.16 to 4.06) |
| 1460 | 9 | 28 | 50.0 (34.2 to 63.9) | 256.8 (222.3 to 293.6) | 206.8 (170.3 to 246.3) | 5.14 (3.85 to 7.71) | 3.22 (1.67 to 8.59) |
| 1825 | 8 | 23 | 65.4 (45.0 to 84.3) | 300.6 (264.0 to 337.3) | 235.1 (193.4 to 278.2) | 4.59 (3.48 to 6.61) | 3.00 (1.45 to 8.09) |
| 2190 | 4 | 18 | 74.6 (52.5 to 95.0) | 341.9 (297.4 to 382.4) | 267.2 (222.3 to 314.9) | 4.58 (3.48 to 6.61) | *** |
| 2555 | 4 | 10 | 86.0 (59.7 to 110.0) | 370.4 (325.3 to 415.9) | 284.4 (233.3 to 335.8) | 4.31 (3.20 to 6.08) | *** |
| 2920 | 6 | 11 | 107.4 (76.2 to 140.4) | 410.8 (358.7 to 462.7) | 303.3 (244.5 to 363.8) | 3.82 (2.83 to 5.54) | *** |
| 3285 | 6 | 9 | 136.6 (97.6 to 173.7) | 453.1 (400.2 to 510.2) | 316.5 (254.9 to 393.4) | 3.32 (2.49 to 4.78) | *** |
| 3650 | 3 | 8 | 158.3 (114.1 to 204.4) | 508.1 (443.1 to 585.1) | 349.8 (266.8 to 439.7) | 3.21 (2.40 to 4.57) | *** |
| 4015 | 1 | 2 | 173.5 (120.7 to 231.1) | 529.5 (461.2 to 617.7) | 356.0 (263.4 to 462.5) | 3.05 (2.24 to 4.60) | *** |
| 4380 | 1 | 3 | 190.3 (133.5 to 257.3) | 595.7 (492.4 to 714.0) | 405.3 (283.8 to 543.5) | 3.13 (2.13 to 4.66) | *** |
| 4745 | 0 | 0 | 190.3 (133.5 to 257.3) | 595.7 (492.4 to 714.0) | 405.3 (283.8 to 543.5) | 3.13 (2.13 to 4.66) | *** |
| 5110 | 0 | 0 | 190.3 (133.5 to 257.3) | 595.7 (492.4 to 714.0) | 405.3 (283.8 to 543.5) | 3.13 (2.13 to 4.66) | *** |
| **Cause: Cancer Digestive Organs** | | | | | | | |
| 30 | 2 | 7 | 1.8 (0.0 to 4.5) | 6.3 (2.2 to 11.7) | 4.5 (-0.9 to 9.9) | *** | *** |
| 90 | 2 | 20 | 3.6 (0.9 to 8.1) | 24.6 (16.4 to 34.6) | 21.0 (11.8 to 31.4) | *** | *** |
| 180 | 4 | 12 | 7.4 (2.7 to 13.0) | 35.9 (24.9 to 47.0) | 28.5 (16.4 to 41.2) | 4.86 (2.45 to 14.96) | *** |
| 365 | 16 | 29 | 23.4 (14.6 to 33.1) | 64.9 (50.2 to 81.1) | 41.4 (23.3 to 59.5) | 2.77 (1.73 to 4.80) | 1.83 (1.01 to 3.56) |
| 730 | 17 | 37 | 42.6 (29.7 to 56.0) | 106.6 (86.2 to 126.9) | 63.9 (36.9 to 87.6) | 2.50 (1.73 to 3.66) | 2.21 (1.30 to 3.97) |
| 1095 | 20 | 42 | 69.0 (52.4 to 87.8) | 161.7 (134.8 to 187.5) | 92.7 (57.2 to 122.7) | 2.34 (1.71 to 3.28) | 2.16 (1.32 to 3.94) |
| 1460 | 26 | 56 | 110.7 (88.8 to 135.3) | 251.1 (213.4 to 284.4) | 140.4 (92.7 to 179.6) | 2.27 (1.73 to 2.94) | 2.23 (1.41 to 3.58) |
| 1825 | 12 | 29 | 133.9 (108.7 to 160.5) | 308.3 (264.4 to 344.3) | 174.4 (123.4 to 219.2) | 2.30 (1.82 to 2.95) | 2.52 (1.37 to 5.39) |
| 2190 | 7 | 16 | 150.0 (121.1 to 179.7) | 345.1 (297.7 to 383.5) | 195.1 (137.0 to 240.6) | 2.30 (1.82 to 2.94) | 2.40 (1.05 to 6.49) |
| 2555 | 9 | 20 | 176.6 (143.1 to 209.6) | 402.5 (346.9 to 447.7) | 225.9 (157.6 to 284.5) | 2.28 (1.79 to 2.99) | 2.36 (1.06 to 6.24) |
| 2920 | 6 | 14 | 199.0 (161.6 to 236.4) | 453.0 (391.8 to 508.0) | 253.9 (176.6 to 322.6) | 2.28 (1.77 to 2.89) | 2.49 (0.92 to 10.20) |
| 3285 | 4 | 10 | 219.2 (176.1 to 262.7) | 503.3 (434.4 to 569.4) | 284.1 (196.0 to 362.7) | 2.30 (1.75 to 2.92) | *** |
| 3650 | 5 | 7 | 253.3 (203.7 to 303.9) | 550.6 (474.7 to 621.2) | 297.3 (190.2 to 385.4) | 2.17 (1.65 to 2.78) | *** |
| 4015 | 5 | 4 | 306.9 (238.6 to 384.4) | 598.7 (508.4 to 678.7) | 291.8 (174.0 to 395.9) | 1.95 (1.46 to 2.54) | *** |
| 4380 | 1 | 0 | 332.8 (254.4 to 424.0) | 598.7 (508.4 to 678.7) | 265.9 (122.5 to 382.4) | 1.80 (1.31 to 2.43) | *** |
| 4745 | 0 | 1 | 332.8 (254.4 to 424.0) | 660.4 (521.9 to 831.5) | 327.5 (154.6 to 541.9) | 1.98 (1.40 to 2.89) | *** |
| 5110 | 0 | 0 | 332.8 (254.4 to 424.0) | 660.4 (521.9 to 831.5) | 327.5 (154.6 to 541.9) | 1.98 (1.40 to 2.89) | *** |
| **Cause: Ischaemic heart diseases** | | | | | | | |
| 30 | 3 | 3 | 2.7 (0.0 to 6.3) | 2.7 (0.0 to 6.3) | 0.0 (-4.5 to 4.5) | *** | *** |
| 90 | 8 | 11 | 10.0 (4.5 to 16.4) | 12.8 (6.4 to 20.1) | 2.8 (-6.3 to 11.5) | 1.28 (0.52 to 2.80) | *** |
| 180 | 13 | 16 | 22.3 (14.8 to 31.6) | 28.0 (18.6 to 38.4) | 5.7 (-7.3 to 17.8) | 1.26 (0.74 to 2.12) | 1.24 (0.60 to 2.86) |
| 365 | 21 | 39 | 43.3 (31.3 to 56.9) | 67.0 (51.3 to 84.4) | 23.7 (3.1 to 44.4) | 1.55 (1.06 to 2.28) | 1.88 (1.12 to 3.39) |
| 730 | 46 | 69 | 95.2 (77.1 to 115.8) | 145.0 (121.2 to 171.6) | 49.8 (17.0 to 80.1) | 1.52 (1.16 to 1.96) | 1.53 (1.02 to 2.19) |
| 1095 | 32 | 41 | 138.4 (116.6 to 162.6) | 199.5 (169.5 to 231.3) | 61.1 (24.2 to 99.4) | 1.44 (1.15 to 1.79) | 1.32 (0.86 to 2.10) |
| 1460 | 34 | 49 | 191.7 (165.1 to 221.6) | 278.2 (240.5 to 315.9) | 86.5 (39.7 to 130.2) | 1.45 (1.18 to 1.74) | 1.49 (1.00 to 2.32) |
| 1825 | 26 | 30 | 242.1 (207.0 to 282.2) | 335.8 (292.6 to 376.6) | 93.6 (35.4 to 145.7) | 1.39 (1.13 to 1.66) | 1.20 (0.71 to 2.24) |
| 2190 | 25 | 30 | 301.0 (258.9 to 346.7) | 405.1 (354.9 to 452.8) | 104.1 (36.8 to 163.9) | 1.35 (1.11 to 1.62) | 1.26 (0.75 to 2.23) |
| 2555 | 15 | 26 | 342.3 (293.3 to 396.4) | 479.0 (421.6 to 538.7) | 136.6 (61.3 to 209.0) | 1.40 (1.16 to 1.66) | 1.84 (0.91 to 3.70) |
| 2920 | 9 | 18 | 374.8 (321.8 to 432.0) | 545.0 (477.2 to 609.8) | 170.2 (82.5 to 250.9) | 1.45 (1.21 to 1.73) | 2.13 (1.06 to 6.05) |
| 3285 | 12 | 18 | 434.6 (378.7 to 499.6) | 633.4 (557.8 to 714.9) | 198.8 (94.9 to 301.3) | 1.46 (1.20 to 1.76) | 1.61 (0.76 to 3.53) |
| 3650 | 7 | 8 | 481.5 (414.1 to 556.5) | 691.3 (610.8 to 783.3) | 209.8 (105.1 to 317.2) | 1.44 (1.20 to 1.74) | 1.24 (0.60 to 2.86) |
| 4015 | 5 | 10 | 546.8 (458.9 to 643.3) | 816.5 (706.2 to 935.5) | 269.7 (126.2 to 404.1) | 1.49 (1.21 to 1.85) | 1.88 (1.12 to 3.39) |
| 4380 | 5 | 4 | 685.3 (550.5 to 857.8) | 908.7 (783.6 to 1057.4) | 223.4 (7.1 to 430.8) | 1.33 (1.01 to 1.72) | 1.53 (1.02 to 2.19) |
| 4745 | 1 | 0 | 738.9 (562.8 to 929.0) | 908.7 (783.6 to 1057.4) | 169.8 (-62.2 to 393.6) | 1.23 (0.93 to 1.66) | 1.32 (0.86 to 2.10) |
| 5110 | 0 | 0 | 738.9 (562.8 to 929.0) | 908.7 (783.6 to 1057.4) | 169.8 (-62.2 to 393.6) | 1.23 (0.93 to 1.66) | 1.49 (1.00 to 2.32) |
| **Cause: Cerebrovascular diseases** | | | | | | | |
| 30 | 5 | 5 | 4.5 (0.9 to 8.1) | 4.5 (0.9 to 8.6) | -0.0 (-5.4 to 6.3) | *** | *** |
| 90 | 8 | 12 | 11.8 (5.5 to 19.1) | 15.5 (8.6 to 23.2) | 3.6 (-6.3 to 13.6) | 1.31 (0.65 to 3.16) | 1.50 (0.70 to 4.68) |
| 180 | 15 | 6 | 26.0 (16.7 to 36.1) | 21.1 (12.8 to 30.3) | -4.9 (-16.9 to 7.2) | 0.81 (0.48 to 1.41) | 0.40 (0.11 to 1.00) |
| 365 | 10 | 25 | 36.0 (24.5 to 47.6) | 46.1 (34.5 to 61.0) | 10.1 (-5.7 to 27.8) | 1.28 (0.87 to 2.01) | 2.52 (1.24 to 5.82) |
| 730 | 31 | 42 | 70.4 (54.3 to 86.7) | 93.3 (74.5 to 114.1) | 22.9 (0.2 to 50.3) | 1.32 (1.00 to 1.83) | 1.38 (0.90 to 2.22) |
| 1095 | 30 | 47 | 110.3 (88.9 to 131.0) | 155.9 (129.1 to 182.5) | 45.6 (16.1 to 79.4) | 1.41 (1.13 to 1.86) | 1.61 (1.05 to 2.47) |
| 1460 | 25 | 31 | 150.3 (125.7 to 175.8) | 205.7 (175.6 to 241.1) | 55.4 (17.5 to 94.4) | 1.37 (1.10 to 1.69) | 1.28 (0.79 to 2.07) |
| 1825 | 18 | 22 | 185.0 (154.4 to 214.0) | 248.7 (214.7 to 285.0) | 63.7 (18.6 to 111.4) | 1.34 (1.09 to 1.68) | 1.28 (0.70 to 2.58) |
| 2190 | 17 | 36 | 224.1 (187.6 to 260.0) | 332.2 (289.2 to 379.8) | 108.1 (55.4 to 165.5) | 1.48 (1.23 to 1.82) | 2.23 (1.34 to 4.25) |
| 2555 | 16 | 13 | 269.0 (228.8 to 312.3) | 369.4 (320.9 to 418.6) | 100.4 (35.6 to 161.4) | 1.37 (1.12 to 1.68) | 0.86 (0.39 to 1.64) |
| 2920 | 13 | 9 | 316.5 (269.8 to 372.5) | 402.4 (351.0 to 457.5) | 86.0 (8.6 to 152.6) | 1.27 (1.03 to 1.54) | 0.74 (0.27 to 1.78) |
| 3285 | 17 | 6 | 399.8 (341.5 to 469.2) | 431.6 (371.6 to 488.2) | 31.7 (-65.5 to 116.0) | 1.08 (0.86 to 1.32) | 0.38 (0.09 to 0.84) |
| 3650 | 6 | 7 | 444.1 (373.2 to 516.4) | 480.1 (407.8 to 547.8) | 36.1 (-65.4 to 133.8) | 1.08 (0.87 to 1.34) | *** |
| 4015 | 5 | 7 | 506.8 (424.6 to 601.5) | 567.3 (477.8 to 677.3) | 60.5 (-72.5 to 192.5) | 1.12 (0.88 to 1.43) | *** |
| 4380 | 2 | 1 | 544.7 (446.3 to 659.2) | 585.7 (492.8 to 702.8) | 40.9 (-106.5 to 196.0) | 1.08 (0.83 to 1.41) | *** |
| 4745 | 2 | 1 | 688.1 (489.3 to 927.2) | 659.8 (509.9 to 861.0) | -28.3 (-330.4 to 260.8) | 0.96 (0.63 to 1.49) | *** |
| 5110 | 0 | 0 | 688.1 (489.3 to 927.2) | 659.8 (509.9 to 861.0) | -28.3 (-330.4 to 260.8) | 0.96 (0.63 to 1.49) | *** |
| **Cause: Accidents** | | | | | | | |
| 30 | 2 | 5 | 1.8 (0.0 to 4.5) | 4.5 (0.9 to 9.0) | 2.7 (-1.8 to 7.2) | *** | *** |
| 90 | 8 | 11 | 9.1 (4.6 to 14.7) | 14.6 (8.2 to 21.9) | 5.4 (-2.8 to 13.7) | 1.60 (0.75 to 3.51) | *** |
| 180 | 8 | 21 | 16.7 (10.1 to 25.9) | 34.4 (24.1 to 46.3) | 17.7 (4.6 to 30.7) | 2.06 (1.22 to 3.86) | 2.64 (1.26 to 6.77) |
| 365 | 21 | 25 | 37.7 (26.4 to 49.7) | 59.4 (46.0 to 75.4) | 21.7 (2.1 to 41.1) | 1.58 (1.04 to 2.42) | 1.20 (0.67 to 2.29) |
| 730 | 40 | 53 | 82.8 (66.5 to 101.0) | 119.2 (99.9 to 141.7) | 36.4 (8.5 to 63.0) | 1.44 (1.08 to 1.88) | 1.35 (0.88 to 2.04) |
| 1095 | 31 | 44 | 124.1 (101.7 to 146.1) | 178.0 (152.0 to 210.2) | 53.9 (16.4 to 93.4) | 1.43 (1.11 to 1.89) | 1.46 (0.97 to 2.49) |
| 1460 | 30 | 31 | 172.6 (145.9 to 201.9) | 227.8 (195.2 to 264.0) | 55.3 (11.5 to 98.6) | 1.32 (1.06 to 1.65) | 1.07 (0.63 to 1.78) |
| 1825 | 19 | 28 | 209.8 (177.4 to 243.5) | 282.5 (247.1 to 323.1) | 72.7 (25.5 to 122.7) | 1.35 (1.11 to 1.67) | 1.54 (0.84 to 3.04) |
| 2190 | 15 | 24 | 244.4 (210.1 to 284.7) | 338.2 (298.3 to 387.7) | 93.8 (39.3 to 153.8) | 1.38 (1.14 to 1.67) | 1.68 (0.95 to 3.15) |
| 2555 | 15 | 16 | 286.8 (243.1 to 333.7) | 383.8 (337.7 to 434.7) | 97.0 (32.5 to 162.1) | 1.34 (1.11 to 1.63) | 1.13 (0.57 to 2.44) |
| 2920 | 13 | 12 | 334.1 (290.2 to 386.4) | 427.4 (375.0 to 487.2) | 93.3 (18.8 to 163.3) | 1.28 (1.05 to 1.53) | 0.99 (0.41 to 2.35) |
| 3285 | 10 | 8 | 383.9 (327.8 to 443.6) | 467.5 (412.1 to 535.5) | 83.6 (0.2 to 166.2) | 1.22 (1.00 to 1.47) | *** |
| 3650 | 3 | 2 | 403.8 (340.2 to 464.7) | 482.7 (419.8 to 556.1) | 78.9 (-12.5 to 168.1) | 1.20 (0.97 to 1.45) | *** |
| 4015 | 2 | 3 | 432.6 (355.3 to 506.0) | 519.0 (447.7 to 603.5) | 86.4 (-16.3 to 183.2) | 1.20 (0.97 to 1.50) | *** |
| 4380 | 1 | 2 | 458.9 (377.3 to 560.0) | 578.9 (477.6 to 711.2) | 120.0 (-35.4 to 268.5) | 1.26 (0.93 to 1.65) | *** |
| 4745 | 0 | 0 | 458.9 (377.3 to 560.0) | 578.9 (477.6 to 711.2) | 120.0 (-35.4 to 268.5) | 1.26 (0.93 to 1.65) | *** |
| 5110 | 0 | 1 | 458.9 (377.3 to 560.0) | 827.2 (502.4 to 1409.4) | 368.3 (17.6 to 965.0) | 1.80 (1.03 to 3.17) | *** |
| **Cause: Assault** | | | | | | | |
| 30 | 5 | 13 | 4.5 (0.9 to 9.0) | 11.7 (5.4 to 18.8) | 7.2 (-0.5 to 14.4) | *** | *** |
| 90 | 14 | 27 | 17.3 (10.0 to 25.5) | 36.4 (25.5 to 48.7) | 19.2 (6.4 to 34.2) | 2.11 (1.28 to 3.77) | 1.93 (1.06 to 3.85) |
| 180 | 17 | 45 | 33.3 (22.2 to 44.5) | 79.0 (62.3 to 96.5) | 45.7 (26.1 to 66.1) | 2.38 (1.67 to 3.71) | 2.66 (1.65 to 5.79) |
| 365 | 33 | 92 | 66.4 (50.2 to 83.2) | 171.2 (148.1 to 199.1) | 104.7 (77.2 to 135.1) | 2.58 (1.98 to 3.48) | 2.81 (1.93 to 4.73) |
| 730 | 54 | 144 | 126.8 (104.6 to 147.7) | 332.3 (294.5 to 370.9) | 205.5 (164.2 to 249.0) | 2.62 (2.20 to 3.25) | 2.71 (2.04 to 3.79) |
| 1095 | 53 | 101 | 198.1 (169.3 to 230.6) | 466.3 (422.7 to 508.4) | 268.2 (214.2 to 316.1) | 2.35 (1.98 to 2.82) | 1.96 (1.37 to 2.71) |
| 1460 | 29 | 93 | 243.8 (212.5 to 278.3) | 615.0 (562.1 to 667.1) | 371.1 (307.6 to 427.0) | 2.52 (2.13 to 2.94) | 3.32 (2.27 to 5.14) |
| 1825 | 35 | 71 | 311.6 (273.9 to 355.9) | 752.0 (690.0 to 815.5) | 440.4 (366.3 to 513.3) | 2.41 (2.08 to 2.82) | 2.12 (1.42 to 3.19) |
| 2190 | 20 | 48 | 358.9 (316.7 to 406.3) | 863.7 (797.1 to 939.0) | 504.9 (430.5 to 589.5) | 2.41 (2.09 to 2.81) | 2.52 (1.56 to 4.34) |
| 2555 | 21 | 37 | 419.1 (365.5 to 471.2) | 968.7 (891.3 to 1044.7) | 549.6 (462.0 to 636.3) | 2.31 (2.01 to 2.71) | 1.87 (1.16 to 3.50) |
| 2920 | 19 | 28 | 488.6 (425.5 to 549.5) | 1070.0 (988.1 to 1155.9) | 581.5 (474.6 to 693.9) | 2.19 (1.89 to 2.56) | 1.57 (0.84 to 2.86) |
| 3285 | 9 | 21 | 534.1 (465.9 to 601.6) | 1171.5 (1074.7 to 1265.9) | 637.4 (516.5 to 764.1) | 2.19 (1.88 to 2.55) | 2.51 (1.30 to 6.69) |
| 3650 | 6 | 7 | 579.3 (501.1 to 660.9) | 1218.7 (1123.9 to 1318.0) | 639.4 (507.8 to 770.3) | 2.10 (1.79 to 2.46) | *** |
| 4015 | 6 | 8 | 650.1 (556.2 to 751.4) | 1304.5 (1186.9 to 1424.1) | 654.5 (483.0 to 815.3) | 2.01 (1.66 to 2.38) | *** |
| 4380 | 0 | 2 | 650.1 (556.2 to 751.4) | 1370.3 (1224.6 to 1520.8) | 720.3 (532.1 to 908.2) | 2.11 (1.73 to 2.55) | *** |
| 4745 | 0 | 0 | 650.1 (556.2 to 751.4) | 1370.3 (1224.6 to 1520.8) | 720.3 (532.1 to 908.2) | 2.11 (1.73 to 2.55) | *** |
| 5110 | 0 | 0 | 650.1 (556.2 to 751.4) | 1370.3 (1224.6 to 1520.8) | 720.3 (532.1 to 908.2) | 2.11 (1.73 to 2.55) | *** |

*** IRR/RR was not estimated when there were fewer than 20 events in the risk period or fewer than 5 events in one group.

# Supplementary Table 8. Estimated risk of death by cause-specific (defined by ICD-10 blocks) comparing household Tuberculosis contacts compared to non-exposed controls.

|  | **Number of events** | | **Risk per 100,000** | |  |  |  |
| --- | --- | --- | --- | --- | --- | --- | --- |
| **Time - Days** | **Unexposed** | **Exposed** | **Unexposed** | **Exposed** | **Risk difference per 100,000 - 95% CI** | **Risk ratio - 95% CI** | **Incidence rate ratio - 95% CI** |
| **Cause: Cancer Respiratory** | | | | | | | |
| 30 | 0 | 1 | 0.0 (0.0 to 0.0) | 0.2 (0.0 to 0.7) | 0.2 (0.0 to 0.7) | *** | *** |
| 90 | 3 | 6 | 0.7 (0.0 to 1.6) | 1.6 (0.5 to 3.0) | 0.9 (-0.6 to 2.4) | *** | *** |
| 180 | 8 | 7 | 2.6 (1.2 to 4.4) | 3.2 (1.8 to 5.1) | 0.7 (-1.9 to 3.0) | 1.27 (0.53 to 3.16) | *** |
| 365 | 10 | 14 | 5.0 (2.9 to 7.2) | 6.7 (4.3 to 9.3) | 1.7 (-1.7 to 5.2) | 1.33 (0.74 to 2.53) | 1.40 (0.57 to 4.00) |
| 730 | 21 | 23 | 10.8 (7.4 to 14.2) | 13.0 (9.7 to 16.4) | 2.2 (-2.2 to 7.2) | 1.21 (0.83 to 1.89) | 1.10 (0.63 to 2.19) |
| 1095 | 18 | 22 | 16.5 (12.4 to 20.8) | 20.1 (15.9 to 24.6) | 3.6 (-2.8 to 10.3) | 1.22 (0.86 to 1.76) | 1.22 (0.67 to 2.31) |
| 1460 | 16 | 16 | 22.5 (17.6 to 27.7) | 26.0 (20.6 to 31.6) | 3.5 (-3.6 to 11.2) | 1.16 (0.85 to 1.58) | 1.00 (0.50 to 2.01) |
| 1825 | 12 | 15 | 27.7 (22.2 to 33.3) | 32.4 (26.5 to 39.4) | 4.7 (-3.4 to 13.7) | 1.17 (0.89 to 1.59) | 1.25 (0.59 to 3.01) |
| 2190 | 9 | 18 | 32.4 (26.1 to 38.7) | 41.8 (34.6 to 49.6) | 9.3 (-0.1 to 19.2) | 1.29 (1.00 to 1.70) | 2.01 (0.92 to 6.02) |
| 2555 | 7 | 9 | 36.8 (30.0 to 43.6) | 47.4 (39.0 to 55.9) | 10.6 (-0.3 to 20.6) | 1.29 (0.99 to 1.64) | *** |
| 2920 | 13 | 8 | 47.3 (38.5 to 55.9) | 53.8 (44.5 to 64.1) | 6.4 (-6.3 to 19.2) | 1.14 (0.88 to 1.47) | 0.62 (0.19 to 1.41) |
| 3285 | 3 | 7 | 50.4 (40.5 to 59.9) | 61.0 (50.0 to 72.4) | 10.6 (-3.0 to 25.5) | 1.21 (0.95 to 1.55) | *** |
| 3650 | 3 | 0 | 54.5 (44.1 to 64.9) | 61.0 (50.0 to 72.4) | 6.6 (-7.7 to 22.4) | 1.12 (0.88 to 1.47) | *** |
| 4015 | 5 | 3 | 64.5 (50.6 to 77.6) | 67.0 (53.8 to 80.3) | 2.5 (-16.0 to 22.3) | 1.04 (0.78 to 1.40) | *** |
| 4380 | 3 | 2 | 75.9 (58.0 to 94.1) | 73.5 (58.9 to 91.6) | -2.4 (-26.6 to 20.9) | 0.97 (0.70 to 1.35) | *** |
| 4745 | 1 | 0 | 82.5 (61.3 to 105.2) | 73.5 (58.9 to 91.6) | -9.0 (-35.1 to 18.2) | 0.89 (0.65 to 1.29) | *** |
| 5110 | 0 | 0 | 82.5 (61.3 to 105.2) | 73.5 (58.9 to 91.6) | -9.0 (-35.1 to 18.2) | 0.89 (0.65 to 1.29) | *** |
| **Cause: Cancer Digestive Organs** | | | | | | | |
| 30 | 7 | 8 | 1.6 (0.7 to 2.9) | 1.8 (0.7 to 3.1) | 0.2 (-1.6 to 1.8) | *** | *** |
| 90 | 5 | 7 | 2.7 (1.3 to 4.3) | 3.4 (1.9 to 5.2) | 0.7 (-1.6 to 2.7) | 1.25 (0.59 to 2.85) | *** |
| 180 | 11 | 17 | 5.3 (3.2 to 7.6) | 7.4 (5.0 to 9.9) | 2.1 (-1.0 to 5.6) | 1.39 (0.85 to 2.55) | 1.55 (0.71 to 3.82) |
| 365 | 16 | 27 | 9.2 (6.4 to 12.3) | 14.0 (10.5 to 17.4) | 4.8 (0.0 to 9.6) | 1.52 (1.00 to 2.39) | 1.69 (0.92 to 3.42) |
| 730 | 47 | 43 | 22.3 (17.5 to 26.8) | 25.9 (20.7 to 30.5) | 3.6 (-2.5 to 9.9) | 1.16 (0.90 to 1.53) | 0.92 (0.63 to 1.36) |
| 1095 | 44 | 40 | 36.3 (30.6 to 42.4) | 38.5 (31.7 to 44.7) | 2.2 (-6.2 to 10.5) | 1.06 (0.85 to 1.32) | 0.91 (0.58 to 1.42) |
| 1460 | 43 | 31 | 52.3 (45.1 to 59.7) | 49.8 (41.3 to 57.5) | -2.5 (-13.1 to 8.4) | 0.95 (0.77 to 1.18) | 0.72 (0.44 to 1.14) |
| 1825 | 31 | 28 | 65.6 (56.0 to 74.3) | 61.9 (52.2 to 70.7) | -3.8 (-15.6 to 8.8) | 0.94 (0.77 to 1.15) | 0.91 (0.54 to 1.59) |
| 2190 | 19 | 25 | 75.5 (65.3 to 85.3) | 74.9 (64.8 to 84.8) | -0.6 (-14.4 to 13.8) | 0.99 (0.82 to 1.20) | 1.32 (0.74 to 2.58) |
| 2555 | 26 | 18 | 92.0 (79.3 to 104.4) | 86.5 (75.6 to 98.0) | -5.5 (-22.1 to 10.8) | 0.94 (0.78 to 1.13) | 0.70 (0.36 to 1.30) |
| 2920 | 13 | 16 | 102.3 (88.3 to 115.0) | 99.0 (85.9 to 113.2) | -3.3 (-22.7 to 15.3) | 0.97 (0.80 to 1.16) | 1.24 (0.56 to 2.64) |
| 3285 | 13 | 12 | 115.8 (101.5 to 130.8) | 111.2 (95.5 to 126.8) | -4.7 (-24.6 to 14.3) | 0.96 (0.80 to 1.14) | 0.93 (0.42 to 1.97) |
| 3650 | 7 | 12 | 125.9 (109.0 to 144.2) | 128.0 (111.1 to 147.1) | 2.1 (-22.3 to 24.9) | 1.02 (0.84 to 1.22) | *** |
| 4015 | 4 | 8 | 133.7 (115.2 to 154.1) | 145.2 (124.4 to 167.8) | 11.5 (-16.6 to 38.9) | 1.09 (0.89 to 1.33) | *** |
| 4380 | 5 | 2 | 154.1 (127.3 to 180.6) | 153.6 (130.5 to 178.6) | -0.5 (-34.3 to 37.4) | 1.00 (0.80 to 1.28) | *** |
| 4745 | 0 | 1 | 154.1 (127.3 to 180.6) | 161.9 (133.6 to 193.2) | 7.8 (-28.0 to 49.1) | 1.05 (0.83 to 1.38) | *** |
| 5110 | 1 | 1 | 175.0 (134.7 to 227.7) | 196.5 (139.1 to 289.1) | 21.5 (-57.4 to 125.9) | 1.12 (0.72 to 1.78) | *** |
| **Cause: Ischaemic heart diseases** | | | | | | | |
| 30 | 6 | 7 | 1.3 (0.4 to 2.5) | 1.6 (0.6 to 2.9) | 0.2 (-1.2 to 1.7) | *** | *** |
| 90 | 15 | 15 | 4.8 (2.7 to 6.8) | 5.0 (3.0 to 7.3) | 0.2 (-2.7 to 3.2) | 1.04 (0.55 to 1.91) | 1.00 (0.44 to 2.22) |
| 180 | 27 | 20 | 11.1 (8.1 to 14.3) | 9.7 (6.7 to 12.9) | -1.4 (-5.9 to 3.1) | 0.87 (0.57 to 1.34) | 0.74 (0.40 to 1.39) |
| 365 | 44 | 52 | 22.0 (17.7 to 26.7) | 22.5 (17.7 to 27.3) | 0.5 (-5.8 to 7.2) | 1.02 (0.75 to 1.38) | 1.18 (0.81 to 1.73) |
| 730 | 73 | 87 | 42.1 (36.0 to 47.9) | 46.4 (39.5 to 53.3) | 4.3 (-5.2 to 14.0) | 1.10 (0.88 to 1.37) | 1.19 (0.90 to 1.64) |
| 1095 | 58 | 65 | 60.6 (52.9 to 68.1) | 67.1 (57.6 to 76.1) | 6.5 (-5.2 to 19.1) | 1.11 (0.92 to 1.34) | 1.12 (0.80 to 1.57) |
| 1460 | 66 | 50 | 84.9 (74.8 to 93.9) | 85.5 (74.8 to 95.9) | 0.7 (-14.3 to 15.2) | 1.01 (0.84 to 1.20) | 0.76 (0.51 to 1.04) |
| 1825 | 36 | 44 | 100.5 (89.5 to 110.1) | 104.4 (92.4 to 115.5) | 3.8 (-12.8 to 19.6) | 1.04 (0.88 to 1.21) | 1.23 (0.80 to 1.91) |
| 2190 | 31 | 43 | 116.7 (104.4 to 128.2) | 126.5 (113.9 to 140.3) | 9.8 (-7.1 to 26.8) | 1.08 (0.94 to 1.24) | 1.39 (0.91 to 2.27) |
| 2555 | 37 | 33 | 140.3 (125.7 to 154.0) | 147.2 (133.3 to 162.9) | 6.9 (-11.6 to 27.7) | 1.05 (0.92 to 1.21) | 0.90 (0.57 to 1.48) |
| 2920 | 32 | 36 | 165.5 (148.9 to 179.7) | 175.7 (158.1 to 193.6) | 10.1 (-11.7 to 35.4) | 1.06 (0.93 to 1.23) | 1.13 (0.70 to 1.84) |
| 3285 | 19 | 29 | 184.8 (165.3 to 204.8) | 205.7 (184.9 to 225.8) | 20.9 (-6.4 to 50.7) | 1.11 (0.97 to 1.30) | 1.53 (0.88 to 2.94) |
| 3650 | 20 | 16 | 214.1 (192.1 to 236.2) | 228.2 (207.4 to 250.6) | 14.1 (-16.0 to 47.3) | 1.07 (0.93 to 1.25) | 0.80 (0.39 to 1.58) |
| 4015 | 12 | 7 | 240.4 (213.2 to 266.2) | 244.6 (220.5 to 269.4) | 4.1 (-32.2 to 42.9) | 1.02 (0.88 to 1.20) | *** |
| 4380 | 3 | 8 | 252.0 (222.6 to 282.0) | 273.9 (241.0 to 307.7) | 22.0 (-19.3 to 69.2) | 1.09 (0.93 to 1.31) | *** |
| 4745 | 2 | 1 | 264.9 (232.3 to 301.0) | 283.9 (250.5 to 326.1) | 19.0 (-34.6 to 73.5) | 1.07 (0.88 to 1.31) | *** |
| 5110 | 0 | 1 | 264.9 (232.3 to 301.0) | 311.7 (258.6 to 384.9) | 46.7 (-25.6 to 128.0) | 1.18 (0.91 to 1.51) | *** |
| **Cause: Cerebrovascular diseases** | | | | | | | |
| 30 | 5 | 10 | 1.1 (0.2 to 2.2) | 2.2 (0.9 to 3.6) | 1.1 (-0.4 to 2.7) | *** | *** |
| 90 | 7 | 12 | 2.7 (1.4 to 4.3) | 5.0 (3.0 to 7.2) | 2.3 (-0.1 to 4.8) | 1.83 (0.96 to 4.11) | *** |
| 180 | 26 | 23 | 8.8 (6.3 to 11.9) | 10.4 (7.5 to 13.5) | 1.5 (-2.4 to 5.4) | 1.18 (0.76 to 1.79) | 0.88 (0.47 to 1.55) |
| 365 | 36 | 38 | 17.8 (13.5 to 22.3) | 19.8 (15.8 to 23.7) | 2.0 (-3.6 to 7.4) | 1.11 (0.83 to 1.51) | 1.06 (0.67 to 1.67) |
| 730 | 76 | 73 | 38.7 (32.8 to 45.1) | 39.7 (33.7 to 45.7) | 1.0 (-7.7 to 8.9) | 1.03 (0.82 to 1.26) | 0.96 (0.68 to 1.34) |
| 1095 | 53 | 72 | 55.6 (48.0 to 63.5) | 62.6 (54.6 to 70.9) | 7.0 (-3.4 to 17.2) | 1.13 (0.94 to 1.34) | 1.36 (0.98 to 1.98) |
| 1460 | 44 | 48 | 71.9 (63.2 to 80.2) | 80.5 (71.3 to 89.7) | 8.6 (-4.2 to 21.1) | 1.12 (0.95 to 1.32) | 1.09 (0.74 to 1.67) |
| 1825 | 50 | 49 | 93.6 (83.9 to 104.9) | 101.7 (90.4 to 112.5) | 8.1 (-7.4 to 22.4) | 1.09 (0.93 to 1.25) | 0.98 (0.66 to 1.39) |
| 2190 | 37 | 42 | 112.6 (101.6 to 125.1) | 123.4 (111.2 to 135.7) | 10.8 (-8.4 to 25.7) | 1.10 (0.93 to 1.25) | 1.14 (0.77 to 1.78) |
| 2555 | 27 | 32 | 129.3 (116.1 to 143.4) | 143.9 (129.8 to 158.4) | 14.6 (-4.1 to 31.8) | 1.11 (0.97 to 1.26) | 1.19 (0.71 to 2.03) |
| 2920 | 31 | 29 | 154.2 (140.7 to 171.7) | 166.6 (149.8 to 183.3) | 12.4 (-9.7 to 32.9) | 1.08 (0.94 to 1.23) | 0.94 (0.54 to 1.57) |
| 3285 | 18 | 24 | 172.4 (155.7 to 192.6) | 191.0 (171.2 to 210.3) | 18.5 (-6.1 to 41.0) | 1.11 (0.97 to 1.25) | 1.34 (0.72 to 2.57) |
| 3650 | 20 | 18 | 202.1 (181.1 to 224.5) | 215.7 (191.2 to 238.0) | 13.6 (-17.7 to 40.6) | 1.07 (0.92 to 1.22) | 0.91 (0.50 to 1.68) |
| 4015 | 12 | 8 | 227.0 (202.1 to 255.5) | 231.9 (207.0 to 257.6) | 4.9 (-31.3 to 39.9) | 1.02 (0.87 to 1.19) | 0.67 (0.22 to 1.58) |
| 4380 | 7 | 7 | 250.6 (219.9 to 288.1) | 258.4 (228.1 to 294.6) | 7.8 (-38.3 to 54.8) | 1.03 (0.85 to 1.24) | *** |
| 4745 | 4 | 2 | 303.8 (246.1 to 372.6) | 279.6 (239.9 to 329.2) | -24.2 (-107.6 to 54.4) | 0.92 (0.70 to 1.21) | *** |
| 5110 | 1 | 0 | 324.6 (253.8 to 409.1) | 279.6 (239.9 to 329.2) | -45.0 (-134.5 to 53.3) | 0.86 (0.66 to 1.20) | *** |
| **Cause: Accidents** | | | | | | | |
| 30 | 9 | 6 | 2.0 (0.7 to 3.6) | 1.3 (0.4 to 2.5) | -0.7 (-2.5 to 0.9) | 0.67 (0.20 to 1.99) | *** |
| 90 | 20 | 17 | 6.6 (4.3 to 9.0) | 5.2 (3.2 to 7.3) | -1.4 (-4.6 to 1.4) | 0.79 (0.44 to 1.30) | 0.85 (0.40 to 1.54) |
| 180 | 22 | 26 | 11.8 (9.0 to 15.0) | 11.4 (8.3 to 14.4) | -0.4 (-4.9 to 4.2) | 0.97 (0.65 to 1.45) | 1.18 (0.66 to 2.00) |
| 365 | 58 | 73 | 26.2 (21.3 to 31.0) | 29.4 (24.4 to 34.8) | 3.2 (-4.3 to 10.2) | 1.12 (0.86 to 1.44) | 1.26 (0.91 to 1.81) |
| 730 | 82 | 85 | 48.5 (41.7 to 54.9) | 52.7 (45.3 to 59.4) | 4.2 (-6.1 to 13.8) | 1.09 (0.88 to 1.31) | 1.04 (0.77 to 1.43) |
| 1095 | 86 | 73 | 75.9 (67.2 to 85.0) | 75.9 (67.4 to 84.4) | -0.1 (-12.7 to 10.6) | 1.00 (0.85 to 1.15) | 0.85 (0.62 to 1.14) |
| 1460 | 61 | 68 | 98.3 (89.0 to 108.2) | 101.0 (90.6 to 111.1) | 2.7 (-12.8 to 16.2) | 1.03 (0.88 to 1.18) | 1.12 (0.79 to 1.59) |
| 1825 | 48 | 69 | 118.8 (108.3 to 130.5) | 131.1 (118.4 to 143.5) | 12.3 (-5.8 to 28.8) | 1.10 (0.95 to 1.26) | 1.44 (1.03 to 2.11) |
| 2190 | 49 | 65 | 144.1 (131.9 to 158.0) | 164.7 (149.2 to 181.1) | 20.6 (-0.7 to 40.3) | 1.14 (1.00 to 1.30) | 1.33 (0.91 to 1.98) |
| 2555 | 47 | 38 | 173.9 (158.4 to 188.9) | 188.7 (171.7 to 206.6) | 14.8 (-8.8 to 39.6) | 1.08 (0.95 to 1.24) | 0.81 (0.52 to 1.25) |
| 2920 | 47 | 33 | 211.5 (193.5 to 229.5) | 214.8 (196.3 to 234.9) | 3.3 (-25.4 to 33.0) | 1.02 (0.89 to 1.17) | 0.71 (0.44 to 1.11) |
| 3285 | 32 | 26 | 244.7 (222.8 to 266.2) | 242.2 (222.0 to 267.3) | -2.5 (-33.7 to 31.5) | 0.99 (0.87 to 1.13) | 0.82 (0.48 to 1.38) |
| 3650 | 21 | 18 | 273.5 (248.1 to 298.2) | 267.9 (244.3 to 296.0) | -5.6 (-41.3 to 30.9) | 0.98 (0.86 to 1.12) | 0.86 (0.43 to 1.70) |
| 4015 | 12 | 19 | 301.8 (272.6 to 332.5) | 306.5 (276.6 to 338.4) | 4.7 (-43.1 to 50.8) | 1.02 (0.87 to 1.18) | 1.59 (0.71 to 3.44) |
| 4380 | 10 | 5 | 343.2 (303.3 to 382.7) | 326.7 (296.1 to 362.6) | -16.5 (-68.5 to 41.1) | 0.95 (0.82 to 1.13) | *** |
| 4745 | 1 | 2 | 351.1 (309.1 to 396.8) | 343.5 (304.8 to 385.4) | -7.6 (-72.2 to 52.1) | 0.98 (0.82 to 1.16) | *** |
| 5110 | 1 | 0 | 371.7 (317.7 to 432.5) | 343.5 (304.8 to 385.4) | -28.2 (-102.4 to 44.9) | 0.92 (0.76 to 1.14) | *** |
| **Cause: Assault** | | | | | | | |
| 30 | 14 | 23 | 3.1 (1.6 to 4.7) | 5.2 (2.9 to 7.4) | 2.0 (-0.7 to 4.7) | 1.64 (0.84 to 3.35) | 1.64 (0.84 to 3.36) |
| 90 | 33 | 52 | 10.6 (7.7 to 13.9) | 17.0 (12.8 to 21.0) | 6.4 (1.1 to 10.9) | 1.60 (1.08 to 2.29) | 1.58 (1.00 to 2.51) |
| 180 | 36 | 61 | 19.1 (15.4 to 24.1) | 31.3 (25.8 to 36.8) | 12.2 (5.2 to 18.6) | 1.64 (1.23 to 2.14) | 1.70 (1.15 to 2.74) |
| 365 | 78 | 147 | 38.4 (32.7 to 44.9) | 67.7 (59.9 to 75.6) | 29.3 (18.5 to 38.8) | 1.76 (1.43 to 2.12) | 1.89 (1.41 to 2.56) |
| 730 | 169 | 238 | 85.0 (75.3 to 94.3) | 133.2 (120.7 to 144.5) | 48.2 (31.3 to 62.4) | 1.57 (1.34 to 1.81) | 1.41 (1.16 to 1.76) |
| 1095 | 129 | 225 | 126.0 (114.4 to 137.9) | 204.4 (188.7 to 218.5) | 78.5 (59.1 to 97.5) | 1.62 (1.45 to 1.84) | 1.75 (1.43 to 2.20) |
| 1460 | 158 | 188 | 184.5 (170.0 to 200.0) | 273.3 (255.2 to 290.7) | 88.8 (66.4 to 112.2) | 1.48 (1.34 to 1.65) | 1.19 (0.96 to 1.47) |
| 1825 | 133 | 156 | 242.4 (224.9 to 261.4) | 340.7 (318.3 to 360.5) | 98.3 (70.7 to 125.4) | 1.41 (1.28 to 1.54) | 1.18 (0.93 to 1.49) |
| 2190 | 107 | 136 | 298.1 (278.0 to 320.8) | 410.7 (385.5 to 436.0) | 112.7 (80.6 to 143.5) | 1.38 (1.26 to 1.50) | 1.28 (0.99 to 1.65) |
| 2555 | 100 | 116 | 361.0 (338.8 to 387.3) | 484.7 (455.6 to 512.7) | 123.7 (84.6 to 158.6) | 1.34 (1.22 to 1.46) | 1.16 (0.90 to 1.49) |
| 2920 | 69 | 81 | 415.2 (388.2 to 443.5) | 549.5 (518.6 to 582.9) | 134.3 (91.0 to 179.5) | 1.32 (1.21 to 1.45) | 1.18 (0.87 to 1.61) |
| 3285 | 73 | 78 | 490.2 (460.2 to 523.1) | 629.4 (593.0 to 661.7) | 139.3 (92.5 to 188.5) | 1.28 (1.18 to 1.40) | 1.07 (0.77 to 1.50) |
| 3650 | 55 | 73 | 568.4 (532.5 to 610.8) | 731.4 (687.4 to 774.4) | 163.0 (103.3 to 220.5) | 1.29 (1.18 to 1.40) | 1.33 (0.94 to 1.91) |
| 4015 | 39 | 37 | 651.4 (607.7 to 702.1) | 807.6 (753.0 to 859.8) | 156.2 (89.3 to 226.8) | 1.24 (1.13 to 1.37) | 0.96 (0.60 to 1.46) |
| 4380 | 22 | 19 | 730.8 (673.6 to 794.2) | 887.0 (827.9 to 954.8) | 156.3 (64.8 to 243.4) | 1.21 (1.08 to 1.35) | 0.87 (0.45 to 1.71) |
| 4745 | 8 | 9 | 798.4 (724.4 to 875.2) | 967.4 (888.7 to 1056.2) | 169.0 (49.3 to 285.3) | 1.21 (1.06 to 1.38) | *** |
| 5110 | 3 | 5 | 896.4 (778.2 to 1039.8) | 1099.2 (957.5 to 1269.0) | 202.9 (-0.6 to 404.2) | 1.23 (1.00 to 1.50) | *** |

*** IRR/RR was not estimated when there were fewer than 20 events in the risk period or fewer than 5 events in one group.

# Supplementary Table 9. Estimated risk of death of natural causes (excluding external causes, TB and HIV deaths) comparing diagnosed Tuberculosis cases compared to non-exposed controls by subgroup.

|  | **Number of events** | | **Risk per 100,000** | |  |  |  |
| --- | --- | --- | --- | --- | --- | --- | --- |
| **Time - Days** | **Unexposed** | **Exposed** | **Unexposed** | **Exposed** | **Risk difference per 100,000 - 95% CI** | **Risk ratio - 95% CI** | **Incidence rate ratio - 95% CI** |
| **Subgroup: Male** | | | | | | | |
| 30 | 37 | 1026 | 31.7 (22.3 to 41.1) | 876.6 (827.0 to 929.0) | 844.9 (797.0 to 894.4) | 27.68 (21.21 to 39.12) | 28.24 (21.63 to 39.89) |
| 90 | 86 | 765 | 106.7 (88.4 to 127.6) | 1541.6 (1474.6 to 1619.5) | 1434.9 (1368.0 to 1505.2) | 14.45 (12.11 to 17.60) | 9.25 (7.43 to 12.08) |
| 180 | 121 | 578 | 215.8 (190.2 to 243.1) | 2060.9 (1990.2 to 2146.3) | 1845.1 (1766.4 to 1929.8) | 9.55 (8.51 to 10.96) | 5.03 (4.18 to 6.15) |
| 365 | 245 | 817 | 449.3 (410.0 to 490.8) | 2838.3 (2747.3 to 2941.2) | 2389.0 (2286.1 to 2495.9) | 6.32 (5.72 to 6.94) | 3.55 (3.10 to 4.13) |
| 730 | 417 | 1207 | 895.2 (842.2 to 955.3) | 4125.8 (4014.5 to 4245.0) | 3230.6 (3103.9 to 3363.2) | 4.61 (4.28 to 4.93) | 3.13 (2.84 to 3.54) |
| 1095 | 389 | 899 | 1379.4 (1304.9 to 1460.5) | 5244.0 (5109.1 to 5375.9) | 3864.6 (3720.5 to 4012.5) | 3.80 (3.56 to 4.04) | 2.54 (2.27 to 2.86) |
| 1460 | 380 | 747 | 1937.1 (1843.5 to 2027.3) | 6332.9 (6180.2 to 6478.9) | 4395.7 (4227.4 to 4583.7) | 3.27 (3.11 to 3.46) | 2.18 (1.94 to 2.49) |
| 1825 | 305 | 647 | 2463.5 (2348.0 to 2579.0) | 7444.7 (7276.0 to 7619.5) | 4981.1 (4781.3 to 5196.4) | 3.02 (2.88 to 3.18) | 2.38 (2.11 to 2.75) |
| 2190 | 253 | 545 | 2989.1 (2860.6 to 3104.4) | 8568.3 (8364.9 to 8756.5) | 5579.1 (5370.1 to 5807.5) | 2.87 (2.74 to 3.00) | 2.45 (2.14 to 2.83) |
| 2555 | 179 | 414 | 3447.0 (3303.6 to 3587.6) | 9619.8 (9402.8 to 9830.5) | 6172.8 (5928.8 to 6419.7) | 2.79 (2.67 to 2.92) | 2.66 (2.26 to 3.17) |
| 2920 | 142 | 290 | 3908.8 (3746.6 to 4075.2) | 10554.2 (10309.4 to 10789.9) | 6645.4 (6391.6 to 6948.8) | 2.70 (2.58 to 2.83) | 2.37 (1.95 to 2.93) |
| 3285 | 124 | 266 | 4441.6 (4244.3 to 4635.8) | 11688.8 (11417.4 to 11942.2) | 7247.2 (6946.8 to 7562.5) | 2.63 (2.52 to 2.77) | 2.52 (2.04 to 3.15) |
| 3650 | 92 | 156 | 4982.4 (4757.2 to 5217.3) | 12625.1 (12324.6 to 12937.5) | 7642.7 (7297.8 to 7995.9) | 2.53 (2.41 to 2.66) | 2.01 (1.56 to 2.59) |
| 4015 | 57 | 117 | 5489.1 (5229.9 to 5745.5) | 13714.3 (13351.2 to 14075.5) | 8225.2 (7802.2 to 8672.6) | 2.50 (2.38 to 2.63) | 2.46 (1.83 to 3.38) |
| 4380 | 32 | 66 | 6072.1 (5755.0 to 6397.7) | 14869.4 (14409.0 to 15325.0) | 8797.3 (8292.1 to 9290.4) | 2.45 (2.31 to 2.59) | 2.50 (1.74 to 4.06) |
| 4745 | 16 | 17 | 6924.8 (6389.3 to 7455.6) | 15662.3 (15045.5 to 16296.5) | 8737.5 (7928.7 to 9550.7) | 2.26 (2.09 to 2.47) | 1.31 (0.62 to 2.99) |
| 5110 | 5 | 0 | 7955.6 (6895.1 to 9105.7) | 15662.3 (15045.5 to 16296.5) | 7706.7 (6254.4 to 8989.2) | 1.97 (1.69 to 2.28) | *** |
| **Subgroup: Female** | | | | | | | |
| 30 | 17 | 498 | 24.9 (13.2 to 36.7) | 729.5 (667.2 to 794.8) | 704.6 (641.6 to 770.6) | 29.26 (19.56 to 52.95) | 29.72 (19.86 to 53.81) |
| 90 | 30 | 354 | 69.6 (50.5 to 89.6) | 1256.0 (1176.6 to 1334.2) | 1186.4 (1101.5 to 1270.5) | 18.05 (13.82 to 24.33) | 12.18 (8.94 to 18.31) |
| 180 | 45 | 264 | 138.5 (109.8 to 167.7) | 1659.9 (1564.2 to 1756.3) | 1521.4 (1420.3 to 1617.9) | 11.98 (9.95 to 15.08) | 6.12 (4.45 to 8.49) |
| 365 | 92 | 334 | 287.1 (243.6 to 327.9) | 2196.9 (2084.1 to 2305.1) | 1909.7 (1793.2 to 2023.7) | 7.65 (6.69 to 9.05) | 3.82 (3.11 to 4.94) |
| 730 | 148 | 485 | 548.6 (488.6 to 599.3) | 3050.6 (2920.2 to 3184.5) | 2502.0 (2368.5 to 2643.9) | 5.56 (5.03 to 6.27) | 3.49 (2.96 to 4.22) |
| 1095 | 169 | 338 | 888.5 (809.6 to 962.8) | 3733.8 (3580.0 to 3881.2) | 2845.3 (2680.5 to 3001.7) | 4.20 (3.86 to 4.63) | 2.15 (1.80 to 2.63) |
| 1460 | 135 | 303 | 1202.3 (1115.3 to 1293.2) | 4435.5 (4270.5 to 4584.1) | 3233.1 (3060.8 to 3419.7) | 3.69 (3.42 to 4.03) | 2.43 (2.01 to 3.03) |
| 1825 | 130 | 256 | 1553.5 (1442.9 to 1662.2) | 5124.2 (4940.5 to 5301.7) | 3570.7 (3374.9 to 3772.2) | 3.30 (3.07 to 3.56) | 2.15 (1.76 to 2.66) |
| 2190 | 95 | 186 | 1860.2 (1730.8 to 1988.8) | 5719.8 (5520.7 to 5928.9) | 3859.7 (3656.1 to 4081.1) | 3.07 (2.88 to 3.31) | 2.15 (1.69 to 2.72) |
| 2555 | 91 | 173 | 2219.8 (2069.5 to 2369.1) | 6399.8 (6178.3 to 6627.3) | 4180.0 (3932.5 to 4432.4) | 2.88 (2.70 to 3.10) | 2.09 (1.64 to 2.69) |
| 2920 | 71 | 115 | 2570.4 (2391.1 to 2724.5) | 6965.8 (6703.1 to 7214.4) | 4395.4 (4120.7 to 4657.6) | 2.71 (2.54 to 2.91) | 1.80 (1.32 to 2.35) |
| 3285 | 55 | 106 | 2924.5 (2738.3 to 3126.0) | 7645.5 (7349.5 to 7920.0) | 4721.1 (4399.2 to 5019.7) | 2.61 (2.44 to 2.80) | 2.14 (1.58 to 2.98) |
| 3650 | 44 | 78 | 3301.6 (3067.9 to 3516.3) | 8310.9 (7997.5 to 8632.3) | 5009.3 (4670.1 to 5362.7) | 2.52 (2.35 to 2.71) | 1.98 (1.42 to 2.96) |
| 4015 | 30 | 55 | 3699.0 (3430.8 to 3949.9) | 8996.6 (8606.8 to 9336.0) | 5297.6 (4898.9 to 5681.2) | 2.43 (2.26 to 2.63) | 2.06 (1.38 to 3.34) |
| 4380 | 21 | 32 | 4193.0 (3884.3 to 4520.7) | 9741.1 (9296.4 to 10181.8) | 5548.1 (5034.6 to 6090.6) | 2.32 (2.14 to 2.54) | 1.73 (1.05 to 3.08) |
| 4745 | 5 | 13 | 4501.3 (4066.4 to 4932.1) | 10464.9 (9888.6 to 11067.9) | 5963.6 (5287.7 to 6715.9) | 2.32 (2.10 to 2.60) | *** |
| 5110 | 2 | 4 | 4732.7 (4203.8 to 5284.3) | 11068.1 (10260.7 to 12066.8) | 6335.4 (5319.8 to 7335.9) | 2.34 (2.04 to 2.69) | *** |
| **Subgroup: Age <18** | | | | | | | |
| 30 | 0 | 70 | 0.0 (0.0 to 0.0) | 560.0 (432.1 to 680.3) | 560.0 (432.1 to 680.3) | *** | *** |
| 90 | 0 | 43 | 0.0 (0.0 to 0.0) | 907.2 (750.4 to 1064.7) | 907.2 (750.4 to 1064.7) | *** | *** |
| 180 | 1 | 20 | 8.2 (0.0 to 24.7) | 1071.9 (903.0 to 1253.7) | 1063.7 (894.2 to 1241.8) | *** | *** |
| 365 | 1 | 33 | 16.7 (0.0 to 42.2) | 1351.5 (1158.2 to 1558.7) | 1334.8 (1137.1 to 1542.8) | *** | *** |
| 730 | 2 | 24 | 35.5 (8.2 to 73.3) | 1570.7 (1353.9 to 1807.6) | 1535.2 (1335.7 to 1783.1) | 44.27 (21.17 to 194.41) | *** |
| 1095 | 2 | 16 | 57.2 (18.2 to 115.4) | 1743.3 (1516.3 to 1993.6) | 1686.1 (1464.6 to 1944.9) | 30.47 (15.58 to 102.46) | *** |
| 1460 | 1 | 19 | 70.0 (21.8 to 131.7) | 1974.9 (1739.0 to 2236.4) | 1904.9 (1650.1 to 2177.2) | 28.20 (14.49 to 92.20) | *** |
| 1825 | 1 | 7 | 82.9 (30.8 to 149.0) | 2070.0 (1817.2 to 2341.0) | 1987.1 (1726.8 to 2277.8) | 24.97 (13.77 to 65.69) | *** |
| 2190 | 3 | 7 | 127.9 (56.0 to 212.7) | 2175.3 (1909.7 to 2469.5) | 2047.3 (1771.0 to 2347.8) | 17.01 (10.19 to 38.86) | *** |
| 2555 | 2 | 8 | 164.3 (73.2 to 273.2) | 2321.2 (2048.8 to 2637.7) | 2156.9 (1862.2 to 2494.1) | 14.13 (8.60 to 31.50) | *** |
| 2920 | 2 | 5 | 208.9 (100.5 to 350.8) | 2442.2 (2134.5 to 2772.4) | 2233.2 (1915.1 to 2579.3) | 11.69 (7.03 to 25.45) | *** |
| 3285 | 0 | 3 | 208.9 (100.5 to 350.8) | 2528.6 (2213.3 to 2883.6) | 2319.7 (1989.4 to 2668.8) | 12.10 (7.22 to 25.89) | *** |
| 3650 | 1 | 2 | 244.3 (133.1 to 405.3) | 2613.8 (2262.1 to 2970.7) | 2369.5 (1991.7 to 2775.6) | 10.70 (6.45 to 20.71) | *** |
| 4015 | 1 | 1 | 289.8 (160.3 to 473.0) | 2662.1 (2312.4 to 3038.9) | 2372.3 (1966.3 to 2800.4) | 9.19 (5.44 to 16.90) | *** |
| 4380 | 0 | 1 | 289.8 (160.3 to 473.0) | 2730.2 (2364.6 to 3090.2) | 2440.4 (2031.8 to 2860.8) | 9.42 (5.54 to 17.22) | *** |
| 4745 | 0 | 0 | 289.8 (160.3 to 473.0) | 2730.2 (2364.6 to 3090.2) | 2440.4 (2031.8 to 2860.8) | 9.42 (5.54 to 17.22) | *** |
| 5110 | 0 | 0 | 289.8 (160.3 to 473.0) | 2730.2 (2364.6 to 3090.2) | 2440.4 (2031.8 to 2860.8) | 9.42 (5.54 to 17.22) | *** |
| **Subgroup: Age 18-59** | | | | | | | |
| 30 | 21 | 907 | 13.7 (7.8 to 19.6) | 590.6 (552.5 to 628.7) | 576.9 (537.8 to 614.9) | 43.08 (30.35 to 72.97) | 43.83 (30.86 to 74.28) |
| 90 | 39 | 603 | 39.6 (29.4 to 50.5) | 990.0 (941.4 to 1037.8) | 950.4 (901.3 to 997.6) | 24.98 (19.44 to 33.83) | 15.94 (11.80 to 23.18) |
| 180 | 57 | 465 | 78.7 (65.2 to 93.5) | 1308.1 (1252.9 to 1362.6) | 1229.4 (1173.2 to 1288.1) | 16.62 (13.91 to 20.35) | 8.49 (6.56 to 11.47) |
| 365 | 127 | 638 | 170.6 (149.3 to 194.6) | 1769.5 (1703.9 to 1832.5) | 1599.0 (1534.2 to 1663.9) | 10.37 (9.15 to 11.89) | 5.28 (4.42 to 6.33) |
| 730 | 236 | 1019 | 360.6 (327.3 to 392.5) | 2587.9 (2498.9 to 2662.6) | 2227.3 (2131.7 to 2305.5) | 7.18 (6.50 to 7.90) | 4.60 (4.06 to 5.42) |
| 1095 | 244 | 777 | 587.0 (543.9 to 631.5) | 3308.2 (3206.6 to 3403.3) | 2721.2 (2608.3 to 2813.8) | 5.64 (5.21 to 6.13) | 3.44 (2.97 to 3.98) |
| 1460 | 227 | 658 | 833.1 (782.4 to 886.6) | 4016.8 (3904.1 to 4120.0) | 3183.7 (3063.8 to 3290.4) | 4.82 (4.48 to 5.14) | 3.16 (2.73 to 3.66) |
| 1825 | 194 | 587 | 1079.1 (1013.3 to 1149.6) | 4760.5 (4630.8 to 4887.4) | 3681.4 (3538.2 to 3818.3) | 4.41 (4.13 to 4.73) | 3.34 (2.85 to 3.95) |
| 2190 | 173 | 480 | 1344.5 (1269.9 to 1420.1) | 5494.9 (5348.9 to 5632.8) | 4150.4 (3995.1 to 4318.4) | 4.09 (3.85 to 4.36) | 3.09 (2.61 to 3.64) |
| 2555 | 145 | 368 | 1615.7 (1535.2 to 1704.4) | 6186.8 (6035.1 to 6338.8) | 4571.1 (4404.6 to 4756.1) | 3.83 (3.62 to 4.07) | 2.85 (2.42 to 3.55) |
| 2920 | 119 | 279 | 1898.7 (1799.5 to 1989.4) | 6845.5 (6667.4 to 7018.3) | 4946.8 (4766.3 to 5151.8) | 3.61 (3.42 to 3.82) | 2.66 (2.15 to 3.27) |
| 3285 | 98 | 261 | 2204.6 (2077.8 to 2309.9) | 7651.9 (7442.5 to 7852.0) | 5447.2 (5219.6 to 5680.7) | 3.47 (3.28 to 3.70) | 3.04 (2.44 to 3.85) |
| 3650 | 79 | 173 | 2535.1 (2401.4 to 2659.4) | 8394.8 (8145.7 to 8634.4) | 5859.8 (5606.7 to 6122.6) | 3.31 (3.13 to 3.52) | 2.53 (1.98 to 3.34) |
| 4015 | 56 | 127 | 2904.7 (2737.2 to 3055.6) | 9239.9 (8958.6 to 9508.7) | 6335.1 (6036.3 to 6651.9) | 3.18 (3.00 to 3.39) | 2.64 (1.98 to 3.53) |
| 4380 | 24 | 71 | 3199.2 (2994.0 to 3405.3) | 10102.7 (9794.5 to 10487.0) | 6903.5 (6524.4 to 7343.0) | 3.16 (2.95 to 3.40) | 3.48 (2.25 to 6.06) |
| 4745 | 12 | 23 | 3607.9 (3291.9 to 3936.8) | 10841.5 (10414.0 to 11321.3) | 7233.6 (6690.5 to 7824.6) | 3.00 (2.74 to 3.33) | 2.26 (1.10 to 5.20) |
| 5110 | 5 | 3 | 4116.7 (3624.7 to 4638.2) | 11164.1 (10611.5 to 11796.6) | 7047.4 (6165.6 to 7858.2) | 2.71 (2.35 to 3.14) | *** |
| **Subgroup: Age ≥60** | | | | | | | |
| 30 | 33 | 547 | 171.6 (116.8 to 233.9) | 2841.4 (2615.8 to 3072.8) | 2669.8 (2441.4 to 2901.1) | 16.56 (12.08 to 23.91) | 17.28 (12.59 to 24.94) |
| 90 | 77 | 473 | 580.0 (469.0 to 678.3) | 5344.8 (5033.6 to 5654.4) | 4764.8 (4440.4 to 5102.2) | 9.22 (7.80 to 11.28) | 6.79 (5.47 to 9.06) |
| 180 | 108 | 357 | 1173.7 (1013.5 to 1319.6) | 7297.8 (6939.1 to 7676.1) | 6124.2 (5733.5 to 6548.0) | 6.22 (5.47 to 7.24) | 3.79 (3.14 to 4.73) |
| 365 | 209 | 480 | 2395.9 (2196.6 to 2639.2) | 10089.6 (9696.7 to 10496.1) | 7693.6 (7242.3 to 8169.5) | 4.21 (3.80 to 4.68) | 2.70 (2.30 to 3.15) |
| 730 | 327 | 649 | 4561.4 (4253.8 to 4915.1) | 14364.2 (13833.8 to 14905.5) | 9802.8 (9220.2 to 10449.4) | 3.15 (2.91 to 3.41) | 2.41 (2.11 to 2.72) |
| 1095 | 312 | 444 | 7017.8 (6645.1 to 7445.9) | 17851.8 (17295.9 to 18447.8) | 10834.0 (10119.1 to 11574.3) | 2.54 (2.39 to 2.71) | 1.77 (1.54 to 2.02) |
| 1460 | 287 | 373 | 9808.9 (9312.7 to 10376.3) | 21411.9 (20773.4 to 22082.7) | 11603.0 (10794.9 to 12400.4) | 2.18 (2.05 to 2.32) | 1.64 (1.40 to 1.91) |
| 1825 | 240 | 309 | 12634.6 (12043.6 to 13247.4) | 24971.5 (24266.1 to 25760.1) | 12336.9 (11480.8 to 13272.4) | 1.98 (1.87 to 2.08) | 1.66 (1.42 to 2.00) |
| 2190 | 172 | 244 | 15059.3 (14392.1 to 15745.2) | 28307.4 (27500.6 to 29106.2) | 13248.1 (12221.8 to 14292.9) | 1.88 (1.78 to 1.98) | 1.87 (1.53 to 2.26) |
| 2555 | 123 | 211 | 17259.1 (16471.8 to 17977.3) | 31920.8 (31011.5 to 32872.9) | 14661.7 (13529.2 to 15802.0) | 1.85 (1.75 to 1.95) | 2.32 (1.90 to 3.03) |
| 2920 | 92 | 121 | 19393.5 (18574.8 to 20265.2) | 34627.0 (33751.0 to 35577.4) | 15233.5 (14018.0 to 16501.6) | 1.79 (1.70 to 1.88) | 1.82 (1.40 to 2.33) |
| 3285 | 81 | 108 | 22032.1 (21052.4 to 23023.9) | 38080.1 (37002.8 to 39239.1) | 16048.0 (14637.8 to 17535.1) | 1.73 (1.64 to 1.82) | 1.90 (1.41 to 2.57) |
| 3650 | 56 | 59 | 24667.5 (23530.8 to 25750.8) | 40729.8 (39483.7 to 41970.3) | 16062.3 (14548.9 to 17764.7) | 1.65 (1.57 to 1.74) | 1.53 (1.06 to 2.17) |
| 4015 | 30 | 44 | 26658.2 (25332.3 to 27859.5) | 43544.5 (42113.3 to 44913.6) | 16886.3 (15237.8 to 18726.2) | 1.63 (1.55 to 1.73) | 2.15 (1.37 to 3.27) |
| 4380 | 29 | 26 | 30234.9 (28435.8 to 32064.6) | 46618.1 (45012.6 to 48365.8) | 16383.2 (13977.5 to 18805.4) | 1.54 (1.44 to 1.65) | 1.33 (0.79 to 2.18) |
| 4745 | 9 | 7 | 32980.4 (30629.1 to 35613.1) | 48373.3 (46463.1 to 50786.9) | 15392.9 (12117.7 to 19056.8) | 1.47 (1.34 to 1.61) | *** |
| 5110 | 2 | 1 | 34553.6 (31460.2 to 37707.8) | 49454.3 (46884.3 to 52567.3) | 14900.6 (10525.5 to 19344.6) | 1.43 (1.28 to 1.60) | *** |
| **Subgroup: White** | | | | | | | |
| 30 | 14 | 433 | 28.4 (14.2 to 43.6) | 876.0 (800.0 to 960.2) | 847.7 (768.6 to 935.8) | 30.89 (20.04 to 62.00) | 31.50 (20.44 to 63.33) |
| 90 | 30 | 312 | 90.3 (61.4 to 116.9) | 1518.0 (1412.8 to 1633.6) | 1427.7 (1324.8 to 1539.7) | 16.81 (12.96 to 25.02) | 10.82 (7.90 to 16.96) |
| 180 | 51 | 202 | 199.1 (157.7 to 238.3) | 1947.5 (1835.9 to 2077.0) | 1748.4 (1632.3 to 1885.0) | 9.78 (8.07 to 12.61) | 4.17 (3.18 to 5.83) |
| 365 | 95 | 337 | 413.2 (358.1 to 467.0) | 2706.3 (2569.3 to 2853.6) | 2293.0 (2141.7 to 2465.7) | 6.55 (5.73 to 7.73) | 3.78 (3.04 to 4.73) |
| 730 | 150 | 485 | 791.6 (705.6 to 871.0) | 3925.9 (3766.5 to 4114.9) | 3134.3 (2957.1 to 3334.1) | 4.96 (4.47 to 5.55) | 3.49 (2.92 to 4.19) |
| 1095 | 156 | 373 | 1249.0 (1134.2 to 1359.2) | 5020.1 (4818.5 to 5215.8) | 3771.1 (3548.6 to 4008.5) | 4.02 (3.67 to 4.48) | 2.62 (2.22 to 3.18) |
| 1460 | 147 | 291 | 1754.5 (1607.3 to 1887.0) | 6013.1 (5765.6 to 6251.1) | 4258.5 (4011.7 to 4536.3) | 3.43 (3.16 to 3.76) | 2.19 (1.80 to 2.72) |
| 1825 | 125 | 262 | 2260.7 (2076.2 to 2434.1) | 7067.1 (6786.0 to 7317.1) | 4806.4 (4509.2 to 5102.8) | 3.13 (2.90 to 3.42) | 2.34 (1.94 to 2.85) |
| 2190 | 84 | 209 | 2668.6 (2464.5 to 2866.9) | 8083.8 (7776.6 to 8352.9) | 5415.2 (5087.3 to 5766.1) | 3.03 (2.80 to 3.27) | 2.81 (2.23 to 3.65) |
| 2555 | 72 | 171 | 3100.6 (2886.5 to 3320.9) | 9106.3 (8771.7 to 9424.6) | 6005.7 (5646.5 to 6374.0) | 2.94 (2.73 to 3.16) | 2.72 (2.08 to 3.67) |
| 2920 | 52 | 117 | 3503.4 (3261.4 to 3732.3) | 9997.6 (9665.3 to 10353.2) | 6494.1 (6104.9 to 6917.4) | 2.85 (2.65 to 3.08) | 2.61 (1.91 to 3.78) |
| 3285 | 46 | 111 | 3972.0 (3704.0 to 4254.2) | 11122.3 (10699.4 to 11522.9) | 7150.3 (6683.4 to 7613.4) | 2.80 (2.61 to 3.01) | 2.82 (2.01 to 4.16) |
| 3650 | 28 | 57 | 4344.6 (4031.8 to 4645.4) | 11914.2 (11461.1 to 12356.1) | 7569.6 (7090.3 to 8064.4) | 2.74 (2.55 to 2.96) | 2.41 (1.58 to 3.90) |
| 4015 | 29 | 43 | 4933.4 (4576.3 to 5274.8) | 12766.7 (12237.0 to 13277.7) | 7833.4 (7230.2 to 8419.2) | 2.59 (2.40 to 2.81) | 1.78 (1.17 to 2.82) |
| 4380 | 9 | 25 | 5267.2 (4884.8 to 5702.2) | 13719.0 (13105.1 to 14397.2) | 8451.8 (7773.6 to 9197.1) | 2.60 (2.41 to 2.83) | 3.36 (1.74 to 8.99) |
| 4745 | 6 | 7 | 5766.6 (5206.2 to 6376.0) | 14363.7 (13583.0 to 15185.3) | 8597.0 (7718.2 to 9624.3) | 2.49 (2.24 to 2.80) | *** |
| 5110 | 0 | 0 | 5766.6 (5206.2 to 6376.0) | 14363.7 (13583.0 to 15185.3) | 8597.0 (7718.2 to 9624.3) | 2.49 (2.24 to 2.80) | *** |
| **Subgroup: Black** | | | | | | | |
| 30 | 5 | 176 | 23.7 (4.8 to 47.5) | 833.9 (715.8 to 964.2) | 810.2 (687.0 to 947.1) | 35.12 (17.89 to 170.74) | 35.87 (18.30 to 174.25) |
| 90 | 16 | 142 | 100.9 (62.4 to 143.8) | 1518.1 (1351.0 to 1684.2) | 1417.2 (1249.6 to 1591.9) | 15.04 (10.51 to 25.48) | 9.25 (6.00 to 18.17) |
| 180 | 19 | 87 | 195.4 (141.1 to 257.9) | 1949.8 (1758.5 to 2125.3) | 1754.4 (1560.1 to 1939.3) | 9.98 (7.49 to 14.35) | 4.84 (3.09 to 8.45) |
| 365 | 40 | 146 | 404.8 (322.0 to 489.7) | 2711.9 (2482.2 to 2937.1) | 2307.2 (2055.9 to 2556.6) | 6.70 (5.34 to 8.54) | 3.91 (2.74 to 5.57) |
| 730 | 77 | 217 | 846.5 (730.2 to 976.7) | 3958.3 (3657.6 to 4192.6) | 3111.8 (2781.1 to 3393.8) | 4.68 (3.97 to 5.48) | 3.07 (2.34 to 3.99) |
| 1095 | 84 | 171 | 1399.9 (1235.6 to 1558.9) | 5084.3 (4739.9 to 5372.9) | 3684.4 (3310.1 to 4012.5) | 3.63 (3.18 to 4.17) | 2.26 (1.76 to 2.93) |
| 1460 | 60 | 142 | 1859.5 (1652.6 to 2073.4) | 6164.3 (5769.9 to 6494.3) | 4304.8 (3887.8 to 4691.9) | 3.31 (2.91 to 3.78) | 2.66 (2.01 to 3.57) |
| 1825 | 55 | 120 | 2348.1 (2123.6 to 2584.7) | 7224.5 (6824.2 to 7594.0) | 4876.5 (4385.8 to 5300.0) | 3.08 (2.73 to 3.44) | 2.48 (1.84 to 3.38) |
| 2190 | 49 | 84 | 2859.3 (2579.4 to 3167.0) | 8095.8 (7640.9 to 8512.7) | 5236.4 (4733.4 to 5700.3) | 2.83 (2.53 to 3.16) | 1.97 (1.42 to 2.80) |
| 2555 | 38 | 74 | 3350.3 (3043.0 to 3677.3) | 9041.0 (8551.1 to 9527.6) | 5690.7 (5138.9 to 6213.8) | 2.70 (2.43 to 2.97) | 2.26 (1.56 to 3.26) |
| 2920 | 26 | 48 | 3761.5 (3422.5 to 4113.4) | 9795.6 (9265.7 to 10320.7) | 6034.1 (5455.8 to 6605.5) | 2.60 (2.35 to 2.87) | 2.16 (1.33 to 3.51) |
| 3285 | 24 | 48 | 4256.5 (3859.3 to 4658.9) | 10796.5 (10189.0 to 11382.7) | 6540.0 (5873.8 to 7189.5) | 2.54 (2.27 to 2.83) | 2.35 (1.50 to 4.03) |
| 3650 | 17 | 29 | 4733.5 (4254.2 to 5219.3) | 11614.1 (10978.1 to 12346.7) | 6880.6 (6154.7 to 7658.5) | 2.45 (2.21 to 2.74) | 2.02 (1.18 to 3.84) |
| 4015 | 10 | 18 | 5169.3 (4636.6 to 5685.7) | 12332.1 (11642.1 to 13115.5) | 7162.7 (6335.6 to 8037.7) | 2.39 (2.14 to 2.71) | 2.15 (1.05 to 5.09) |
| 4380 | 10 | 11 | 6006.5 (5193.5 to 6821.3) | 13161.6 (12272.4 to 14053.7) | 7155.0 (6035.1 to 8345.6) | 2.19 (1.91 to 2.54) | 1.33 (0.48 to 3.40) |
| 4745 | 2 | 6 | 6446.8 (5469.9 to 7482.7) | 14022.4 (12918.5 to 15191.7) | 7575.6 (6122.8 to 9048.7) | 2.18 (1.84 to 2.60) | *** |
| 5110 | 2 | 2 | 7728.5 (5750.4 to 9999.7) | 15069.2 (13579.0 to 16860.9) | 7340.8 (4560.2 to 9931.7) | 1.95 (1.46 to 2.62) | *** |
| **Subgroup: Mixed** | | | | | | | |
| 30 | 35 | 896 | 31.0 (20.8 to 41.7) | 793.2 (743.3 to 839.8) | 762.2 (710.8 to 807.2) | 25.56 (19.16 to 38.24) | 26.01 (19.50 to 38.92) |
| 90 | 69 | 655 | 93.3 (76.2 to 113.8) | 1382.7 (1317.1 to 1449.4) | 1289.4 (1223.8 to 1362.6) | 14.82 (12.18 to 18.21) | 9.82 (7.77 to 12.80) |
| 180 | 95 | 544 | 181.7 (157.3 to 207.1) | 1887.5 (1814.9 to 1964.0) | 1705.8 (1631.1 to 1791.0) | 10.39 (9.10 to 12.11) | 5.99 (4.94 to 7.51) |
| 365 | 202 | 661 | 380.2 (344.4 to 414.6) | 2535.0 (2448.7 to 2624.4) | 2154.8 (2067.1 to 2249.6) | 6.67 (6.08 to 7.39) | 3.46 (3.01 to 4.06) |
| 730 | 334 | 983 | 745.2 (694.0 to 797.7) | 3604.9 (3493.8 to 3714.3) | 2859.7 (2749.1 to 2979.9) | 4.84 (4.49 to 5.21) | 3.15 (2.82 to 3.59) |
| 1095 | 315 | 688 | 1141.6 (1074.9 to 1216.0) | 4472.0 (4342.8 to 4606.4) | 3330.4 (3192.9 to 3466.6) | 3.92 (3.66 to 4.17) | 2.37 (2.04 to 2.70) |
| 1460 | 305 | 610 | 1590.6 (1513.5 to 1676.2) | 5365.3 (5216.7 to 5508.2) | 3774.7 (3612.6 to 3934.1) | 3.37 (3.20 to 3.57) | 2.19 (1.94 to 2.52) |
| 1825 | 254 | 519 | 2027.4 (1931.5 to 2131.7) | 6254.8 (6096.2 to 6418.0) | 4227.4 (4057.7 to 4411.6) | 3.09 (2.93 to 3.26) | 2.25 (1.96 to 2.59) |
| 2190 | 212 | 436 | 2467.0 (2350.9 to 2585.7) | 7146.5 (6969.9 to 7319.7) | 4679.5 (4489.2 to 4894.6) | 2.90 (2.76 to 3.05) | 2.28 (1.94 to 2.69) |
| 2555 | 157 | 341 | 2864.7 (2732.6 to 3009.9) | 8003.6 (7811.0 to 8204.4) | 5138.9 (4916.6 to 5390.2) | 2.79 (2.66 to 2.96) | 2.43 (2.04 to 3.00) |
| 2920 | 135 | 238 | 3295.2 (3147.0 to 3447.1) | 8759.7 (8544.4 to 8983.7) | 5464.5 (5199.5 to 5754.7) | 2.66 (2.53 to 2.80) | 1.99 (1.63 to 2.43) |
| 3285 | 108 | 208 | 3748.2 (3566.0 to 3928.5) | 9619.6 (9389.2 to 9880.3) | 5871.4 (5588.9 to 6196.3) | 2.57 (2.43 to 2.71) | 2.19 (1.75 to 2.70) |
| 3650 | 91 | 148 | 4270.1 (4089.7 to 4473.8) | 10468.0 (10195.2 to 10764.2) | 6197.9 (5884.2 to 6548.7) | 2.45 (2.33 to 2.60) | 1.86 (1.47 to 2.40) |
| 4015 | 48 | 109 | 4688.6 (4466.7 to 4932.8) | 11450.2 (11151.3 to 11810.4) | 6761.6 (6395.8 to 7164.3) | 2.44 (2.32 to 2.58) | 2.60 (1.91 to 3.78) |
| 4380 | 33 | 62 | 5245.8 (4925.9 to 5543.5) | 12474.2 (12051.4 to 12906.0) | 7228.4 (6737.6 to 7760.1) | 2.38 (2.24 to 2.56) | 2.17 (1.46 to 3.62) |
| 4745 | 13 | 17 | 5892.4 (5403.9 to 6371.6) | 13295.1 (12723.3 to 13942.9) | 7402.7 (6620.2 to 8191.2) | 2.26 (2.05 to 2.48) | 1.52 (0.71 to 3.47) |
| 5110 | 5 | 2 | 6525.6 (5786.7 to 7361.6) | 13614.8 (12953.1 to 14447.4) | 7089.2 (6125.4 to 8180.5) | 2.09 (1.85 to 2.38) | *** |
| **Subgroup: HIV** | | | | | | | |
| 30 | 4 | 106 | 26.3 (6.6 to 52.6) | 695.6 (554.6 to 826.8) | 669.3 (531.4 to 800.8) | *** | *** |
| 90 | 6 | 77 | 66.5 (29.8 to 106.3) | 1209.1 (1017.4 to 1376.9) | 1142.6 (944.8 to 1314.2) | 18.17 (11.20 to 42.15) | 14.77 (8.12 to 46.23) |
| 180 | 11 | 65 | 142.3 (88.2 to 200.6) | 1655.1 (1426.0 to 1864.3) | 1512.8 (1280.9 to 1720.3) | 11.63 (7.88 to 19.20) | 7.18 (4.19 to 14.70) |
| 365 | 12 | 73 | 230.2 (157.4 to 299.7) | 2186.2 (1951.3 to 2425.3) | 1956.0 (1721.8 to 2198.0) | 9.50 (6.94 to 14.28) | 7.79 (4.67 to 15.64) |
| 730 | 40 | 99 | 552.1 (428.6 to 681.4) | 2993.2 (2718.5 to 3282.1) | 2441.1 (2159.4 to 2756.4) | 5.42 (4.31 to 7.10) | 3.38 (2.42 to 5.04) |
| 1095 | 29 | 60 | 827.7 (675.4 to 996.1) | 3563.3 (3268.4 to 3877.6) | 2735.6 (2396.1 to 3092.4) | 4.31 (3.49 to 5.40) | 3.00 (1.98 to 4.66) |
| 1460 | 24 | 57 | 1090.6 (909.2 to 1289.2) | 4193.3 (3848.0 to 4531.5) | 3102.7 (2721.9 to 3484.5) | 3.84 (3.18 to 4.63) | 3.62 (2.22 to 5.94) |
| 1825 | 21 | 50 | 1368.1 (1170.2 to 1620.5) | 4859.2 (4459.8 to 5263.6) | 3491.1 (3037.1 to 3933.3) | 3.55 (2.97 to 4.32) | 3.80 (2.35 to 6.66) |
| 2190 | 17 | 33 | 1633.1 (1398.4 to 1912.1) | 5410.1 (4942.9 to 5882.6) | 3777.0 (3256.2 to 4321.2) | 3.31 (2.79 to 4.01) | 3.22 (1.71 to 5.75) |
| 2555 | 11 | 28 | 1852.3 (1579.5 to 2181.6) | 5987.8 (5460.9 to 6529.8) | 4135.5 (3530.4 to 4684.2) | 3.23 (2.69 to 3.89) | 4.45 (2.38 to 9.45) |
| 2920 | 10 | 14 | 2114.1 (1826.0 to 2491.5) | 6367.8 (5830.3 to 6952.2) | 4253.7 (3661.4 to 4841.1) | 3.01 (2.52 to 3.59) | 2.56 (1.09 to 6.31) |
| 3285 | 7 | 19 | 2352.7 (2029.2 to 2756.8) | 7055.2 (6377.7 to 7644.7) | 4702.6 (3972.5 to 5349.4) | 3.00 (2.50 to 3.55) | 5.18 (2.42 to 14.80) |
| 3650 | 4 | 12 | 2546.1 (2162.5 to 3026.8) | 7655.8 (6862.7 to 8339.5) | 5109.7 (4262.4 to 5921.5) | 3.01 (2.45 to 3.65) | *** |
| 4015 | 4 | 10 | 2836.4 (2399.4 to 3415.6) | 8442.1 (7586.0 to 9306.5) | 5605.6 (4563.7 to 6654.1) | 2.98 (2.42 to 3.67) | *** |
| 4380 | 3 | 1 | 3237.6 (2610.7 to 4001.7) | 8655.0 (7724.9 to 9654.4) | 5417.4 (4257.5 to 6546.5) | 2.67 (2.09 to 3.38) | *** |
| 4745 | 1 | 0 | 3454.5 (2732.3 to 4258.3) | 8655.0 (7724.9 to 9654.4) | 5200.5 (3907.6 to 6498.0) | 2.51 (1.94 to 3.32) | *** |
| 5110 | 0 | 0 | 3454.5 (2732.3 to 4258.3) | 8655.0 (7724.9 to 9654.4) | 5200.5 (3907.6 to 6498.0) | 2.51 (1.94 to 3.32) | *** |
| **Subgroup: Diabetes** | | | | | | | |
| 30 | 8 | 173 | 82.1 (30.8 to 153.8) | 1776.7 (1519.5 to 2054.5) | 1694.6 (1402.7 to 1976.5) | 21.64 (11.86 to 57.80) | 22.23 (12.19 to 59.37) |
| 90 | 11 | 119 | 197.6 (114.0 to 291.3) | 3025.5 (2683.5 to 3367.0) | 2827.9 (2499.0 to 3181.0) | 15.31 (10.31 to 26.50) | 11.49 (6.89 to 25.58) |
| 180 | 18 | 91 | 394.0 (275.9 to 520.7) | 4018.6 (3610.4 to 4419.1) | 3624.6 (3196.0 to 4073.0) | 10.20 (7.61 to 14.89) | 5.48 (3.38 to 10.03) |
| 365 | 41 | 145 | 873.1 (678.5 to 1096.4) | 5709.8 (5214.1 to 6175.4) | 4836.7 (4298.9 to 5328.1) | 6.54 (5.16 to 8.52) | 3.90 (2.76 to 5.56) |
| 730 | 63 | 231 | 1718.9 (1408.0 to 2020.9) | 8787.0 (8205.3 to 9400.4) | 7068.2 (6431.8 to 7765.8) | 5.11 (4.28 to 6.33) | 4.14 (3.19 to 5.62) |
| 1095 | 51 | 147 | 2532.5 (2145.4 to 2928.7) | 11141.5 (10452.5 to 11883.8) | 8609.1 (7846.9 to 9421.1) | 4.40 (3.73 to 5.26) | 3.33 (2.37 to 4.59) |
| 1460 | 58 | 136 | 3658.8 (3191.1 to 4115.4) | 13752.9 (12956.3 to 14670.8) | 10094.1 (9125.2 to 11102.6) | 3.76 (3.30 to 4.41) | 2.77 (2.06 to 3.76) |
| 1825 | 49 | 138 | 4809.8 (4241.1 to 5394.9) | 16921.3 (15965.9 to 17863.3) | 12111.5 (10950.2 to 13215.9) | 3.52 (3.09 to 4.03) | 3.42 (2.48 to 4.95) |
| 2190 | 36 | 109 | 5838.3 (5158.1 to 6504.6) | 20010.2 (18935.9 to 21084.9) | 14172.0 (12883.7 to 15446.9) | 3.43 (3.05 to 3.92) | 3.79 (2.60 to 5.59) |
| 2555 | 31 | 83 | 6971.4 (6134.1 to 7771.6) | 23068.4 (21906.3 to 24339.5) | 16097.0 (14607.5 to 17674.4) | 3.31 (2.94 to 3.79) | 3.47 (2.42 to 5.68) |
| 2920 | 21 | 59 | 8012.3 (7084.9 to 8858.1) | 25964.2 (24635.1 to 27418.6) | 17951.9 (16249.1 to 19551.0) | 3.24 (2.89 to 3.73) | 3.77 (2.43 to 6.44) |
| 3285 | 17 | 56 | 9238.0 (8183.3 to 10178.6) | 29715.8 (28145.5 to 31298.9) | 20477.8 (18623.6 to 22295.6) | 3.22 (2.88 to 3.66) | 4.65 (2.87 to 8.49) |
| 3650 | 8 | 36 | 9986.6 (8846.2 to 11007.2) | 33362.5 (31460.7 to 35220.6) | 23375.9 (21356.6 to 25581.5) | 3.34 (2.98 to 3.81) | 6.79 (3.63 to 21.13) |
| 4015 | 13 | 22 | 11856.4 (10346.5 to 13425.6) | 36599.9 (34365.4 to 39057.2) | 24743.5 (22282.5 to 27450.1) | 3.09 (2.73 to 3.54) | 2.70 (1.40 to 5.69) |
| 4380 | 0 | 10 | 11856.4 (10346.5 to 13425.6) | 39268.7 (36612.0 to 41950.8) | 27412.3 (24292.7 to 30282.3) | 3.31 (2.88 to 3.85) | *** |
| 4745 | 2 | 2 | 13394.8 (11104.6 to 16520.0) | 40285.5 (37237.7 to 43205.0) | 26890.7 (22875.6 to 30715.7) | 3.01 (2.43 to 3.67) | *** |
| 5110 | 2 | 0 | 20541.9 (12520.0 to 34806.8) | 40285.5 (37237.7 to 43205.0) | 19743.5 (5091.7 to 28574.2) | 1.96 (1.15 to 3.27) | *** |
| **Subgroup: TB - Pulmonary** | | | | | | | |
| 30 | 49 | 1127 | 31.3 (22.3 to 39.5) | 717.7 (678.1 to 755.8) | 686.4 (645.4 to 724.3) | 22.96 (18.29 to 31.78) | 23.35 (18.59 to 32.33) |
| 90 | 103 | 817 | 98.1 (83.1 to 113.3) | 1246.6 (1194.1 to 1300.5) | 1148.5 (1095.8 to 1204.5) | 12.71 (11.04 to 15.16) | 8.18 (6.83 to 10.28) |
| 180 | 144 | 662 | 194.5 (172.7 to 215.6) | 1688.6 (1630.5 to 1752.2) | 1494.1 (1432.8 to 1563.0) | 8.68 (7.80 to 9.77) | 4.79 (4.02 to 5.86) |
| 365 | 294 | 944 | 402.4 (373.6 to 434.1) | 2354.6 (2281.1 to 2431.9) | 1952.3 (1873.4 to 2036.8) | 5.85 (5.37 to 6.35) | 3.38 (2.98 to 3.83) |
| 730 | 484 | 1439 | 782.8 (739.4 to 827.2) | 3482.9 (3387.4 to 3579.8) | 2700.1 (2590.4 to 2799.6) | 4.45 (4.16 to 4.73) | 3.17 (2.86 to 3.46) |
| 1095 | 486 | 1085 | 1223.9 (1166.1 to 1285.1) | 4468.1 (4361.2 to 4564.1) | 3244.2 (3116.3 to 3354.3) | 3.65 (3.45 to 3.85) | 2.41 (2.18 to 2.69) |
| 1460 | 447 | 929 | 1699.1 (1623.1 to 1768.2) | 5449.4 (5328.7 to 5566.4) | 3750.3 (3601.2 to 3886.7) | 3.21 (3.07 to 3.38) | 2.27 (2.01 to 2.53) |
| 1825 | 377 | 804 | 2167.6 (2083.4 to 2249.7) | 6445.8 (6308.0 to 6576.1) | 4278.3 (4123.2 to 4434.9) | 2.97 (2.86 to 3.12) | 2.35 (2.07 to 2.66) |
| 2190 | 299 | 650 | 2613.3 (2514.4 to 2711.1) | 7406.4 (7265.3 to 7548.7) | 4793.0 (4621.1 to 4957.7) | 2.83 (2.72 to 2.95) | 2.41 (2.12 to 2.75) |
| 2555 | 234 | 522 | 3041.4 (2932.8 to 3151.3) | 8355.1 (8177.3 to 8521.7) | 5313.7 (5104.6 to 5495.4) | 2.75 (2.64 to 2.86) | 2.50 (2.13 to 2.90) |
| 2920 | 188 | 376 | 3475.8 (3348.1 to 3602.2) | 9217.2 (9025.9 to 9410.1) | 5741.4 (5536.1 to 5974.8) | 2.65 (2.56 to 2.77) | 2.26 (1.89 to 2.72) |
| 3285 | 160 | 329 | 3961.0 (3809.5 to 4127.5) | 10208.9 (9980.9 to 10438.0) | 6247.9 (5990.5 to 6504.4) | 2.58 (2.47 to 2.69) | 2.34 (1.95 to 2.83) |
| 3650 | 117 | 209 | 4441.6 (4267.0 to 4634.5) | 11077.8 (10826.2 to 11333.9) | 6636.2 (6337.2 to 6932.0) | 2.49 (2.39 to 2.60) | 2.05 (1.61 to 2.61) |
| 4015 | 76 | 154 | 4917.9 (4718.2 to 5127.7) | 12047.6 (11764.9 to 12342.9) | 7129.7 (6795.4 to 7449.8) | 2.45 (2.34 to 2.57) | 2.34 (1.80 to 3.11) |
| 4380 | 44 | 88 | 5440.1 (5183.1 to 5689.9) | 13067.1 (12695.5 to 13448.9) | 7627.0 (7222.4 to 8037.3) | 2.40 (2.28 to 2.53) | 2.33 (1.63 to 3.29) |
| 4745 | 17 | 27 | 5963.7 (5589.8 to 6316.5) | 13887.1 (13432.1 to 14390.7) | 7923.4 (7397.1 to 8465.3) | 2.33 (2.19 to 2.49) | 1.86 (1.02 to 3.53) |
| 5110 | 7 | 4 | 6617.0 (6033.7 to 7249.4) | 14298.2 (13734.0 to 14965.0) | 7681.1 (6888.3 to 8575.5) | 2.16 (1.97 to 2.38) | *** |
| **Subgroup: TB - Extrapulmonary** | | | | | | | |
| 30 | 4 | 304 | 17.4 (2.1 to 39.0) | 1318.8 (1173.3 to 1460.3) | 1301.5 (1156.1 to 1444.5) | *** | *** |
| 90 | 11 | 241 | 66.1 (35.2 to 101.3) | 2382.5 (2183.3 to 2586.8) | 2316.4 (2110.4 to 2519.8) | 36.06 (22.83 to 67.43) | 23.08 (14.26 to 50.52) |
| 180 | 17 | 141 | 143.8 (98.6 to 192.7) | 3025.3 (2781.6 to 3243.7) | 2881.5 (2642.0 to 3103.0) | 21.04 (15.45 to 31.11) | 8.90 (5.56 to 16.12) |
| 365 | 31 | 164 | 293.5 (227.9 to 367.8) | 3813.6 (3528.1 to 4063.4) | 3520.1 (3200.9 to 3783.0) | 12.99 (10.26 to 16.74) | 5.76 (3.88 to 9.01) |
| 730 | 66 | 193 | 648.3 (546.3 to 758.8) | 4843.3 (4522.7 to 5084.7) | 4195.0 (3862.7 to 4464.8) | 7.47 (6.35 to 9.02) | 3.23 (2.50 to 4.27) |
| 1095 | 60 | 119 | 1018.9 (888.8 to 1162.7) | 5580.5 (5240.6 to 5885.8) | 4561.5 (4180.7 to 4879.8) | 5.48 (4.74 to 6.34) | 2.22 (1.60 to 3.05) |
| 1460 | 54 | 101 | 1410.2 (1249.3 to 1576.4) | 6304.8 (5944.8 to 6668.4) | 4894.7 (4502.5 to 5244.7) | 4.47 (3.93 to 5.05) | 2.11 (1.56 to 3.00) |
| 1825 | 48 | 78 | 1815.6 (1615.2 to 2029.9) | 6959.4 (6566.9 to 7337.0) | 5143.8 (4696.3 to 5517.7) | 3.83 (3.38 to 4.31) | 1.85 (1.29 to 2.58) |
| 2190 | 40 | 64 | 2221.0 (1987.4 to 2459.9) | 7614.3 (7200.8 to 8000.4) | 5393.2 (4889.3 to 5801.9) | 3.43 (3.04 to 3.84) | 1.83 (1.26 to 2.83) |
| 2555 | 32 | 46 | 2621.5 (2360.4 to 2905.2) | 8184.7 (7724.1 to 8614.3) | 5563.1 (5082.4 to 6030.7) | 3.12 (2.80 to 3.50) | 1.66 (1.05 to 2.59) |
| 2920 | 24 | 25 | 3000.5 (2695.4 to 3296.5) | 8575.3 (8139.3 to 9036.2) | 5574.8 (5083.7 to 6097.8) | 2.86 (2.57 to 3.17) | 1.21 (0.71 to 2.18) |
| 3285 | 14 | 34 | 3296.3 (2968.7 to 3642.9) | 9269.4 (8783.1 to 9763.2) | 5973.0 (5438.2 to 6561.8) | 2.81 (2.54 to 3.14) | 2.85 (1.63 to 5.85) |
| 3650 | 16 | 22 | 3740.1 (3347.2 to 4159.6) | 9880.4 (9339.6 to 10404.6) | 6140.3 (5563.5 to 6766.5) | 2.64 (2.37 to 2.97) | 1.63 (0.88 to 3.65) |
| 4015 | 7 | 13 | 4037.3 (3583.5 to 4494.5) | 10404.4 (9811.8 to 10968.4) | 6367.1 (5689.5 to 7071.2) | 2.58 (2.29 to 2.90) | 2.21 (0.84 to 7.35) |
| 4380 | 6 | 7 | 4592.8 (3959.1 to 5235.2) | 11002.2 (10209.3 to 11749.9) | 6409.4 (5470.2 to 7346.8) | 2.40 (2.07 to 2.82) | *** |
| 4745 | 4 | 3 | 5605.0 (4554.5 to 6843.8) | 11520.3 (10545.9 to 12569.9) | 5915.3 (4344.1 to 7301.4) | 2.06 (1.66 to 2.56) | *** |
| 5110 | 0 | 0 | 5605.0 (4554.5 to 6843.8) | 11520.3 (10545.9 to 12569.9) | 5915.3 (4344.1 to 7301.4) | 2.06 (1.66 to 2.56) | *** |
| **Subgroup: TB - Pulmonary+Extrapulmonary** | | | | | | | |
| 30 | 1 | 93 | 19.4 (0.0 to 58.2) | 1802.0 (1435.1 to 2141.1) | 1782.6 (1414.0 to 2131.5) | *** | *** |
| 90 | 2 | 61 | 58.9 (0.0 to 128.2) | 3005.4 (2532.9 to 3403.4) | 2946.5 (2485.7 to 3355.1) | *** | *** |
| 180 | 5 | 38 | 161.3 (49.9 to 273.2) | 3778.5 (3229.0 to 4264.6) | 3617.2 (3073.3 to 4110.5) | 23.42 (13.34 to 77.19) | *** |
| 365 | 12 | 41 | 418.6 (247.2 to 590.2) | 4652.9 (4001.5 to 5193.4) | 4234.3 (3586.8 to 4816.5) | 11.12 (7.49 to 19.57) | 8.87 (4.09 to 44.16) |
| 730 | 15 | 60 | 775.9 (519.9 to 1033.9) | 6076.1 (5388.8 to 6741.4) | 5300.2 (4615.2 to 5985.0) | 7.83 (5.72 to 12.14) | 4.10 (2.22 to 9.74) |
| 1095 | 12 | 33 | 1104.3 (799.0 to 1417.0) | 6984.0 (6284.6 to 7708.3) | 5879.7 (5127.1 to 6668.9) | 6.32 (4.84 to 8.83) | 4.97 (3.06 to 9.30) |
| 1460 | 14 | 20 | 1543.6 (1146.7 to 1944.3) | 7613.7 (6819.9 to 8335.6) | 6070.2 (5234.7 to 6941.6) | 4.93 (3.85 to 6.62) | 3.52 (1.86 to 7.94) |
| 1825 | 10 | 21 | 1929.8 (1495.4 to 2390.0) | 8370.0 (7581.9 to 9224.5) | 6440.2 (5504.4 to 7355.8) | 4.34 (3.40 to 5.59) | 1.85 (0.94 to 3.83) |
| 2190 | 9 | 17 | 2344.3 (1873.7 to 2920.7) | 9117.1 (8307.8 to 9988.1) | 6772.8 (5779.2 to 7744.7) | 3.89 (3.07 to 4.86) | 2.77 (1.33 to 6.98) |
| 2555 | 4 | 19 | 2572.3 (2037.2 to 3133.1) | 10165.8 (9226.1 to 11151.1) | 7593.4 (6397.8 to 8689.0) | 3.95 (3.14 to 4.99) | 2.51 (1.22 to 6.24) |
| 2920 | 1 | 4 | 2640.2 (2103.3 to 3232.4) | 10439.7 (9457.9 to 11483.2) | 7799.5 (6554.6 to 8931.7) | 3.95 (3.15 to 5.03) | *** |
| 3285 | 5 | 9 | 3090.6 (2462.5 to 3786.3) | 11272.2 (10128.2 to 12449.2) | 8181.6 (6769.6 to 9413.2) | 3.65 (2.94 to 4.64) | *** |
| 3650 | 3 | 3 | 3492.3 (2651.0 to 4348.0) | 11663.2 (10507.4 to 12913.8) | 8170.9 (6661.7 to 9707.4) | 3.34 (2.61 to 4.50) | *** |
| 4015 | 4 | 5 | 4251.6 (3186.6 to 5421.2) | 12726.0 (11288.9 to 14418.9) | 8474.4 (6722.5 to 10437.5) | 2.99 (2.32 to 4.08) | *** |
| 4380 | 3 | 3 | 5352.9 (3877.3 to 7074.5) | 13921.1 (11907.4 to 16253.8) | 8568.2 (5895.4 to 11520.6) | 2.60 (1.89 to 3.79) | *** |
| 4745 | 0 | 0 | 5352.9 (3877.3 to 7074.5) | 13921.1 (11907.4 to 16253.8) | 8568.2 (5895.4 to 11520.6) | 2.60 (1.89 to 3.79) | *** |
| 5110 | 0 | 0 | 5352.9 (3877.3 to 7074.5) | 13921.1 (11907.4 to 16253.8) | 8568.2 (5895.4 to 11520.6) | 2.60 (1.89 to 3.79) | *** |

*** IRR/RR was not estimated when there were fewer than 20 events in the risk period or fewer than 5 events in one group.

# Supplementary Table 10. Estimated risk of death of natural causes (excluding external causes, TB and HIV deaths) comparing treated Tuberculosis cases compared to non-exposed controls by subgroup.

|  | **Number of events** | | **Risk per 100,000** | |  |  |  |
| --- | --- | --- | --- | --- | --- | --- | --- |
| **Time - Days** | **Unexposed** | **Exposed** | **Unexposed** | **Exposed** | **Risk difference per 100,000 - 95% CI** | **Risk ratio - 95% CI** | **Incidence rate ratio - 95% CI** |
| **Subgroup: Male** | | | | | | | |
| 30 | 26 | 72 | 37.9 (24.8 to 52.5) | 104.9 (82.3 to 126.8) | 67.0 (40.8 to 91.8) | 2.77 (1.85 to 4.24) | 2.77 (1.85 to 4.25) |
| 90 | 49 | 179 | 110.6 (88.4 to 135.7) | 370.9 (323.6 to 416.4) | 260.3 (210.0 to 313.3) | 3.35 (2.65 to 4.25) | 3.66 (2.68 to 5.01) |
| 180 | 67 | 212 | 213.2 (182.2 to 244.4) | 695.8 (633.8 to 753.5) | 482.6 (415.3 to 546.0) | 3.26 (2.75 to 3.86) | 3.18 (2.49 to 4.09) |
| 365 | 125 | 411 | 417.0 (373.9 to 465.5) | 1366.4 (1272.8 to 1446.8) | 949.4 (845.7 to 1039.6) | 3.28 (2.89 to 3.69) | 3.32 (2.75 to 3.99) |
| 730 | 229 | 648 | 840.4 (773.6 to 913.1) | 2565.1 (2440.4 to 2690.2) | 1724.7 (1573.1 to 1861.4) | 3.05 (2.75 to 3.35) | 2.89 (2.49 to 3.34) |
| 1095 | 238 | 527 | 1364.3 (1266.0 to 1470.0) | 3725.5 (3571.8 to 3872.3) | 2361.2 (2176.4 to 2533.5) | 2.73 (2.49 to 2.96) | 2.29 (1.95 to 2.66) |
| 1460 | 212 | 460 | 1924.9 (1805.6 to 2051.1) | 4951.8 (4772.3 to 5135.5) | 3026.9 (2814.8 to 3246.5) | 2.57 (2.39 to 2.76) | 2.26 (1.97 to 2.63) |
| 1825 | 179 | 355 | 2504.7 (2359.5 to 2640.8) | 6105.6 (5892.2 to 6351.6) | 3600.9 (3353.4 to 3850.8) | 2.44 (2.28 to 2.60) | 2.09 (1.76 to 2.54) |
| 2190 | 109 | 281 | 2926.9 (2771.8 to 3095.2) | 7207.1 (6973.2 to 7490.5) | 4280.1 (4010.8 to 4558.8) | 2.46 (2.32 to 2.61) | 2.74 (2.19 to 3.48) |
| 2555 | 93 | 201 | 3371.3 (3196.0 to 3565.0) | 8167.3 (7911.1 to 8462.8) | 4796.0 (4507.1 to 5099.0) | 2.42 (2.27 to 2.57) | 2.32 (1.85 to 2.99) |
| 2920 | 77 | 179 | 3848.4 (3654.8 to 4073.4) | 9272.9 (8988.7 to 9606.0) | 5424.5 (5082.3 to 5790.4) | 2.41 (2.27 to 2.56) | 2.52 (1.98 to 3.25) |
| 3285 | 68 | 129 | 4414.6 (4174.7 to 4660.3) | 10338.9 (10013.2 to 10738.0) | 5924.3 (5512.4 to 6328.5) | 2.34 (2.19 to 2.48) | 2.07 (1.62 to 2.87) |
| 3650 | 40 | 90 | 4886.4 (4608.0 to 5172.8) | 11413.3 (11026.9 to 11849.3) | 6527.0 (6055.9 to 7008.2) | 2.34 (2.19 to 2.49) | 2.48 (1.77 to 3.71) |
| 4015 | 26 | 57 | 5460.2 (5072.0 to 5845.1) | 12579.8 (12105.0 to 13118.4) | 7119.6 (6500.5 to 7729.6) | 2.30 (2.14 to 2.49) | 2.44 (1.61 to 4.04) |
| 4380 | 12 | 25 | 6013.0 (5504.6 to 6522.9) | 13640.3 (13043.4 to 14308.4) | 7627.4 (6852.4 to 8488.6) | 2.27 (2.07 to 2.48) | 2.33 (1.18 to 5.05) |
| 4745 | 7 | 1 | 7100.6 (6175.3 to 8017.2) | 13742.4 (13160.0 to 14432.3) | 6641.8 (5425.8 to 7753.9) | 1.94 (1.68 to 2.24) | *** |
| 5110 | 2 | 0 | 8215.1 (6701.5 to 10128.7) | 13742.4 (13160.0 to 14432.3) | 5527.3 (3604.5 to 7226.3) | 1.67 (1.36 to 2.07) | *** |
| **Subgroup: Female** | | | | | | | |
| 30 | 13 | 34 | 30.5 (16.4 to 49.3) | 79.8 (54.0 to 104.5) | 49.3 (19.9 to 79.7) | 2.62 (1.49 to 5.38) | 2.62 (1.49 to 5.39) |
| 90 | 16 | 61 | 68.6 (47.2 to 96.0) | 225.5 (182.8 to 268.2) | 156.8 (107.1 to 207.8) | 3.28 (2.19 to 4.97) | 3.82 (2.32 to 6.97) |
| 180 | 37 | 87 | 159.6 (124.0 to 196.5) | 439.2 (383.2 to 497.0) | 279.6 (208.1 to 345.7) | 2.75 (2.12 to 3.64) | 2.36 (1.70 to 3.66) |
| 365 | 47 | 150 | 281.3 (228.9 to 330.7) | 826.4 (747.1 to 911.7) | 545.1 (461.6 to 648.1) | 2.94 (2.46 to 3.66) | 3.21 (2.47 to 4.61) |
| 730 | 112 | 232 | 604.0 (521.8 to 681.9) | 1494.2 (1375.0 to 1610.6) | 890.3 (754.9 to 1025.4) | 2.47 (2.16 to 2.87) | 2.10 (1.67 to 2.62) |
| 1095 | 82 | 212 | 879.5 (791.1 to 980.2) | 2202.6 (2052.0 to 2357.9) | 1323.1 (1142.3 to 1481.8) | 2.50 (2.20 to 2.83) | 2.63 (2.05 to 3.44) |
| 1460 | 82 | 181 | 1207.4 (1089.7 to 1328.6) | 2924.8 (2743.0 to 3130.1) | 1717.5 (1507.3 to 1948.8) | 2.42 (2.17 to 2.71) | 2.26 (1.78 to 2.98) |
| 1825 | 64 | 129 | 1515.3 (1381.1 to 1656.4) | 3544.9 (3318.6 to 3773.0) | 2029.5 (1777.3 to 2269.1) | 2.34 (2.09 to 2.58) | 2.08 (1.54 to 2.81) |
| 2190 | 65 | 120 | 1891.9 (1739.8 to 2070.6) | 4237.2 (3977.3 to 4489.7) | 2345.3 (2065.5 to 2585.1) | 2.24 (2.01 to 2.47) | 1.91 (1.42 to 2.58) |
| 2555 | 51 | 99 | 2249.3 (2064.9 to 2472.4) | 4939.9 (4658.1 to 5214.2) | 2690.6 (2362.8 to 2972.0) | 2.20 (1.98 to 2.40) | 2.02 (1.47 to 2.75) |
| 2920 | 52 | 67 | 2720.2 (2486.7 to 2979.4) | 5546.9 (5224.4 to 5807.1) | 2826.7 (2450.0 to 3184.0) | 2.04 (1.84 to 2.23) | 1.35 (0.95 to 1.94) |
| 3285 | 28 | 62 | 3053.0 (2792.8 to 3337.6) | 6271.4 (5881.2 to 6592.6) | 3218.3 (2790.6 to 3593.9) | 2.05 (1.86 to 2.25) | 2.32 (1.55 to 3.84) |
| 3650 | 20 | 37 | 3388.6 (3115.6 to 3691.9) | 6916.1 (6494.7 to 7297.3) | 3527.5 (3010.4 to 3965.8) | 2.04 (1.84 to 2.24) | 1.95 (1.18 to 3.56) |
| 4015 | 16 | 21 | 3843.8 (3454.8 to 4210.6) | 7510.8 (7041.7 to 8000.3) | 3667.0 (3047.6 to 4247.6) | 1.95 (1.76 to 2.19) | 1.39 (0.80 to 2.89) |
| 4380 | 9 | 13 | 4248.4 (3774.5 to 4754.9) | 8127.0 (7581.4 to 8693.2) | 3878.6 (3171.2 to 4591.1) | 1.91 (1.69 to 2.17) | 1.54 (0.66 to 3.88) |
| 4745 | 5 | 4 | 5005.6 (4248.5 to 5894.9) | 8728.7 (7959.0 to 9682.7) | 3723.1 (2527.6 to 4756.7) | 1.74 (1.44 to 2.09) | *** |
| 5110 | 0 | 0 | 5005.6 (4248.5 to 5894.9) | 8728.7 (7959.0 to 9682.7) | 3723.1 (2527.6 to 4756.7) | 1.74 (1.44 to 2.09) | *** |
| **Subgroup: Age <18** | | | | | | | |
| 30 | 0 | 1 | 0.0 (0.0 to 0.0) | 14.4 (0.0 to 43.2) | 14.4 (0.0 to 43.2) | *** | *** |
| 90 | 1 | 11 | 14.7 (0.0 to 58.6) | 174.9 (87.1 to 277.1) | 160.2 (58.0 to 262.8) | *** | *** |
| 180 | 0 | 5 | 14.7 (0.0 to 58.6) | 249.1 (146.3 to 380.8) | 234.4 (118.0 to 365.9) | *** | *** |
| 365 | 0 | 8 | 14.7 (0.0 to 58.6) | 371.6 (237.2 to 508.4) | 356.9 (223.3 to 503.7) | *** | *** |
| 730 | 1 | 10 | 33.1 (0.0 to 88.2) | 541.2 (373.9 to 726.2) | 508.1 (337.0 to 686.5) | *** | *** |
| 1095 | 0 | 8 | 33.1 (0.0 to 88.2) | 702.6 (517.6 to 904.7) | 669.5 (485.5 to 884.9) | *** | *** |
| 1460 | 0 | 6 | 33.1 (0.0 to 88.2) | 841.9 (627.5 to 1060.0) | 808.8 (592.9 to 1040.6) | *** | *** |
| 1825 | 2 | 1 | 86.7 (14.7 to 189.3) | 868.5 (647.7 to 1099.3) | 781.8 (535.1 to 1022.9) | *** | *** |
| 2190 | 1 | 1 | 118.5 (21.9 to 244.7) | 900.3 (666.3 to 1144.2) | 781.8 (527.3 to 1049.5) | 7.60 (3.46 to 47.12) | *** |
| 2555 | 0 | 4 | 118.5 (21.9 to 244.7) | 1034.1 (780.3 to 1319.7) | 915.7 (632.0 to 1227.0) | 8.73 (4.03 to 52.67) | *** |
| 2920 | 0 | 4 | 118.5 (21.9 to 244.7) | 1223.5 (912.3 to 1573.6) | 1105.0 (788.1 to 1475.1) | 10.33 (4.95 to 60.32) | *** |
| 3285 | 1 | 0 | 185.5 (40.7 to 387.0) | 1223.5 (912.3 to 1573.6) | 1038.0 (688.3 to 1418.6) | 6.60 (3.07 to 33.30) | *** |
| 3650 | 0 | 1 | 185.5 (40.7 to 387.0) | 1311.2 (960.9 to 1718.7) | 1125.7 (724.1 to 1524.5) | 7.07 (3.30 to 36.06) | *** |
| 4015 | 0 | 1 | 185.5 (40.7 to 387.0) | 1437.8 (1034.3 to 1889.9) | 1252.3 (807.7 to 1742.1) | 7.75 (3.54 to 36.57) | *** |
| 4380 | 0 | 0 | 185.5 (40.7 to 387.0) | 1437.8 (1034.3 to 1889.9) | 1252.3 (807.7 to 1742.1) | 7.75 (3.54 to 36.57) | *** |
| 4745 | 0 | 0 | 185.5 (40.7 to 387.0) | 1437.8 (1034.3 to 1889.9) | 1252.3 (807.7 to 1742.1) | 7.75 (3.54 to 36.57) | *** |
| 5110 | 0 | 0 | 185.5 (40.7 to 387.0) | 1437.8 (1034.3 to 1889.9) | 1252.3 (807.7 to 1742.1) | 7.75 (3.54 to 36.57) | *** |
| **Subgroup: Age 18-59** | | | | | | | |
| 30 | 15 | 53 | 16.2 (8.7 to 23.8) | 57.3 (43.3 to 71.4) | 41.1 (24.3 to 57.3) | 3.53 (2.15 to 7.12) | 3.53 (2.15 to 7.11) |
| 90 | 21 | 115 | 39.4 (27.3 to 52.5) | 184.0 (156.5 to 210.7) | 144.7 (115.3 to 175.5) | 4.68 (3.34 to 6.89) | 5.49 (3.49 to 9.06) |
| 180 | 36 | 157 | 80.2 (62.5 to 100.1) | 362.3 (322.2 to 398.9) | 282.1 (235.4 to 324.0) | 4.52 (3.48 to 5.94) | 4.38 (3.10 to 6.62) |
| 365 | 69 | 306 | 163.4 (137.9 to 189.9) | 731.3 (680.9 to 784.3) | 567.9 (509.7 to 625.1) | 4.48 (3.69 to 5.43) | 4.47 (3.44 to 5.78) |
| 730 | 137 | 489 | 349.4 (308.9 to 390.7) | 1396.6 (1320.6 to 1474.8) | 1047.2 (958.1 to 1139.0) | 4.00 (3.54 to 4.60) | 3.62 (3.10 to 4.45) |
| 1095 | 132 | 422 | 560.9 (504.7 to 618.2) | 2068.8 (1968.9 to 2166.2) | 1507.9 (1398.2 to 1627.3) | 3.69 (3.32 to 4.21) | 3.27 (2.70 to 4.07) |
| 1460 | 122 | 360 | 793.5 (722.1 to 860.9) | 2758.8 (2640.6 to 2875.5) | 1965.3 (1838.8 to 2101.4) | 3.48 (3.17 to 3.84) | 3.05 (2.51 to 3.77) |
| 1825 | 117 | 282 | 1065.8 (977.5 to 1151.7) | 3418.2 (3278.6 to 3571.6) | 2352.4 (2194.8 to 2513.2) | 3.21 (2.94 to 3.53) | 2.51 (2.01 to 3.12) |
| 2190 | 85 | 227 | 1303.8 (1193.3 to 1396.7) | 4058.5 (3906.9 to 4240.6) | 2754.7 (2579.6 to 2971.6) | 3.11 (2.86 to 3.42) | 2.80 (2.23 to 3.73) |
| 2555 | 67 | 176 | 1533.4 (1416.2 to 1653.3) | 4667.5 (4496.6 to 4864.2) | 3134.2 (2939.0 to 3387.6) | 3.04 (2.80 to 3.33) | 2.77 (2.09 to 3.78) |
| 2920 | 66 | 161 | 1821.5 (1684.9 to 1959.2) | 5380.9 (5179.2 to 5614.2) | 3559.5 (3334.4 to 3808.0) | 2.95 (2.72 to 3.21) | 2.59 (1.98 to 3.49) |
| 3285 | 63 | 128 | 2183.3 (2015.7 to 2343.2) | 6126.2 (5862.8 to 6395.4) | 3942.8 (3654.1 to 4253.4) | 2.81 (2.59 to 3.05) | 2.18 (1.68 to 3.00) |
| 3650 | 37 | 90 | 2491.6 (2301.4 to 2677.6) | 6881.5 (6593.8 to 7199.4) | 4389.9 (4013.8 to 4735.1) | 2.76 (2.52 to 3.00) | 2.62 (1.86 to 3.92) |
| 4015 | 27 | 56 | 2898.6 (2651.6 to 3138.9) | 7702.3 (7342.9 to 8078.0) | 4803.7 (4344.5 to 5262.7) | 2.66 (2.41 to 2.93) | 2.25 (1.45 to 3.58) |
| 4380 | 11 | 23 | 3231.4 (2922.7 to 3532.2) | 8320.8 (7887.3 to 8758.4) | 5089.3 (4570.7 to 5687.5) | 2.57 (2.31 to 2.90) | 2.27 (1.09 to 5.27) |
| 4745 | 7 | 3 | 3901.5 (3352.2 to 4514.2) | 8553.5 (8058.3 to 9118.6) | 4652.0 (3848.2 to 5426.6) | 2.19 (1.87 to 2.58) | *** |
| 5110 | 2 | 0 | 4453.0 (3573.9 to 5431.6) | 8553.5 (8058.3 to 9118.6) | 4100.6 (3062.5 to 5092.8) | 1.92 (1.57 to 2.38) | *** |
| **Subgroup: Age ≥60** | | | | | | | |
| 30 | 24 | 52 | 202.8 (126.7 to 287.7) | 439.2 (316.3 to 565.8) | 236.4 (76.2 to 397.2) | 2.17 (1.29 to 3.97) | 2.17 (1.29 to 3.98) |
| 90 | 43 | 114 | 572.4 (452.2 to 717.6) | 1421.8 (1214.1 to 1661.1) | 849.5 (591.7 to 1125.4) | 2.48 (1.89 to 3.26) | 2.67 (1.90 to 3.67) |
| 180 | 68 | 137 | 1177.9 (1010.0 to 1404.5) | 2643.6 (2359.2 to 2947.9) | 1465.7 (1123.6 to 1797.1) | 2.24 (1.86 to 2.70) | 2.04 (1.54 to 2.75) |
| 365 | 103 | 247 | 2156.2 (1910.3 to 2419.0) | 4985.0 (4641.0 to 5364.8) | 2828.8 (2407.4 to 3263.8) | 2.31 (2.02 to 2.66) | 2.46 (1.99 to 3.14) |
| 730 | 203 | 381 | 4350.1 (3958.8 to 4735.1) | 9083.1 (8605.7 to 9576.0) | 4733.0 (4089.6 to 5381.9) | 2.09 (1.89 to 2.33) | 1.96 (1.65 to 2.34) |
| 1095 | 188 | 309 | 6798.6 (6329.9 to 7306.7) | 13103.3 (12437.6 to 13749.6) | 6304.7 (5438.3 to 7147.7) | 1.93 (1.76 to 2.10) | 1.75 (1.47 to 2.11) |
| 1460 | 172 | 275 | 9619.0 (8979.7 to 10264.4) | 17605.7 (16788.1 to 18377.1) | 7986.7 (6823.1 to 8910.1) | 1.83 (1.68 to 1.99) | 1.73 (1.41 to 2.07) |
| 1825 | 124 | 201 | 12149.6 (11476.1 to 12931.1) | 21653.4 (20600.2 to 22657.3) | 9503.8 (8172.3 to 10625.5) | 1.78 (1.65 to 1.91) | 1.80 (1.45 to 2.29) |
| 2190 | 88 | 173 | 14324.7 (13484.2 to 15195.8) | 25888.1 (24681.1 to 27024.5) | 11563.4 (10225.2 to 12983.7) | 1.81 (1.68 to 1.94) | 2.24 (1.75 to 2.96) |
| 2555 | 77 | 120 | 16725.3 (15751.8 to 17782.9) | 29560.0 (28220.2 to 30813.9) | 12834.7 (11085.1 to 14551.0) | 1.77 (1.64 to 1.90) | 1.82 (1.34 to 2.38) |
| 2920 | 63 | 81 | 19443.9 (18333.1 to 20649.7) | 32869.8 (31494.9 to 34245.7) | 13425.9 (11382.3 to 15350.8) | 1.69 (1.56 to 1.82) | 1.54 (1.13 to 2.11) |
| 3285 | 32 | 63 | 21489.0 (20271.9 to 22856.2) | 36520.6 (35008.4 to 38108.3) | 15031.7 (12856.5 to 17040.1) | 1.70 (1.57 to 1.82) | 2.40 (1.63 to 3.84) |
| 3650 | 23 | 36 | 23537.4 (22024.4 to 25013.8) | 39744.9 (38079.2 to 41626.8) | 16207.4 (13918.7 to 18396.7) | 1.69 (1.56 to 1.81) | 1.94 (1.21 to 3.33) |
| 4015 | 15 | 21 | 25802.3 (23943.4 to 27705.3) | 42542.3 (40561.2 to 44727.2) | 16740.0 (14178.6 to 19389.1) | 1.65 (1.53 to 1.79) | 1.77 (0.92 to 3.32) |
| 4380 | 10 | 15 | 28113.8 (25890.1 to 30664.2) | 46243.3 (44007.9 to 48913.7) | 18129.5 (14932.8 to 21224.5) | 1.64 (1.49 to 1.80) | 1.96 (0.78 to 5.29) |
| 4745 | 5 | 2 | 31847.0 (28168.5 to 35998.8) | 48491.4 (45093.7 to 53302.3) | 16644.4 (11325.9 to 23268.1) | 1.52 (1.32 to 1.81) | *** |
| 5110 | 0 | 0 | 31847.0 (28168.5 to 35998.8) | 48491.4 (45093.7 to 53302.3) | 16644.4 (11325.9 to 23268.1) | 1.52 (1.32 to 1.81) | *** |
| **Subgroup: White** | | | | | | | |
| 30 | 12 | 33 | 42.0 (21.0 to 66.5) | 115.7 (75.3 to 157.7) | 73.6 (28.1 to 119.2) | 2.75 (1.50 to 5.66) | 2.75 (1.50 to 5.65) |
| 90 | 15 | 71 | 95.5 (63.5 to 131.4) | 369.7 (300.8 to 436.2) | 274.1 (197.4 to 345.7) | 3.87 (2.64 to 5.94) | 4.75 (2.94 to 9.21) |
| 180 | 25 | 87 | 188.0 (143.9 to 238.6) | 691.8 (606.5 to 787.0) | 503.8 (395.4 to 614.0) | 3.68 (2.73 to 4.96) | 3.50 (2.29 to 5.82) |
| 365 | 44 | 144 | 362.0 (297.7 to 440.8) | 1259.1 (1119.0 to 1407.7) | 897.1 (741.4 to 1054.0) | 3.48 (2.80 to 4.40) | 3.31 (2.47 to 4.67) |
| 730 | 90 | 268 | 767.5 (662.9 to 886.0) | 2466.3 (2266.4 to 2674.8) | 1698.7 (1473.1 to 1916.0) | 3.21 (2.77 to 3.78) | 3.04 (2.42 to 3.83) |
| 1095 | 86 | 199 | 1235.9 (1097.2 to 1387.8) | 3549.2 (3311.1 to 3790.0) | 2313.3 (2028.7 to 2606.9) | 2.87 (2.50 to 3.29) | 2.39 (1.87 to 3.12) |
| 1460 | 84 | 170 | 1799.0 (1626.4 to 1994.4) | 4694.2 (4397.0 to 4998.1) | 2895.2 (2574.0 to 3217.3) | 2.61 (2.32 to 2.94) | 2.10 (1.65 to 2.78) |
| 1825 | 63 | 130 | 2327.6 (2089.8 to 2547.8) | 5787.3 (5437.8 to 6133.0) | 3459.7 (3045.0 to 3851.3) | 2.49 (2.23 to 2.78) | 2.17 (1.57 to 3.04) |
| 2190 | 37 | 124 | 2705.0 (2424.7 to 2950.4) | 7061.9 (6654.7 to 7474.2) | 4356.9 (3867.6 to 4826.0) | 2.61 (2.36 to 2.94) | 3.57 (2.59 to 5.29) |
| 2555 | 31 | 60 | 3090.5 (2783.4 to 3371.1) | 7820.2 (7376.8 to 8280.4) | 4729.7 (4232.9 to 5222.3) | 2.53 (2.29 to 2.81) | 2.09 (1.43 to 3.33) |
| 2920 | 34 | 66 | 3649.3 (3306.6 to 3992.5) | 8902.4 (8437.0 to 9428.0) | 5253.1 (4663.4 to 5865.3) | 2.44 (2.19 to 2.72) | 2.11 (1.43 to 3.38) |
| 3285 | 19 | 44 | 4049.1 (3635.3 to 4461.6) | 9842.8 (9313.9 to 10454.6) | 5793.7 (5116.1 to 6485.3) | 2.43 (2.19 to 2.72) | 2.55 (1.49 to 4.45) |
| 3650 | 19 | 39 | 4625.7 (4115.6 to 5098.5) | 11018.5 (10373.8 to 11629.5) | 6392.8 (5645.9 to 7142.6) | 2.38 (2.15 to 2.72) | 2.28 (1.36 to 4.18) |
| 4015 | 5 | 14 | 4890.4 (4312.1 to 5422.6) | 11760.0 (11018.1 to 12528.2) | 6869.6 (5998.6 to 7795.3) | 2.40 (2.14 to 2.75) | *** |
| 4380 | 2 | 8 | 5040.3 (4435.8 to 5549.8) | 12547.4 (11641.1 to 13510.7) | 7507.1 (6380.5 to 8582.8) | 2.49 (2.19 to 2.88) | *** |
| 4745 | 1 | 1 | 5249.6 (4581.8 to 5973.8) | 12746.6 (11720.4 to 13852.2) | 7497.0 (6273.5 to 8740.4) | 2.43 (2.08 to 2.85) | *** |
| 5110 | 0 | 0 | 5249.6 (4581.8 to 5973.8) | 12746.6 (11720.4 to 13852.2) | 7497.0 (6273.5 to 8740.4) | 2.43 (2.08 to 2.85) | *** |
| **Subgroup: Black** | | | | | | | |
| 30 | 4 | 11 | 33.1 (8.3 to 58.1) | 91.2 (41.5 to 149.1) | 58.0 (-4.3 to 120.3) | *** | *** |
| 90 | 8 | 23 | 100.5 (50.2 to 150.9) | 285.2 (192.8 to 377.8) | 184.7 (83.7 to 289.7) | 2.84 (1.61 to 5.86) | 2.88 (1.41 to 8.52) |
| 180 | 12 | 38 | 204.6 (126.9 to 282.6) | 614.9 (476.1 to 765.9) | 410.3 (264.5 to 591.8) | 3.01 (2.02 to 5.40) | 3.18 (1.82 to 7.50) |
| 365 | 23 | 56 | 414.0 (304.0 to 520.2) | 1126.3 (935.4 to 1331.0) | 712.3 (523.2 to 939.7) | 2.72 (2.06 to 3.87) | 2.46 (1.55 to 4.30) |
| 730 | 38 | 116 | 803.1 (641.2 to 966.1) | 2309.5 (2053.3 to 2614.5) | 1506.3 (1216.8 to 1825.9) | 2.88 (2.33 to 3.74) | 3.11 (2.29 to 4.71) |
| 1095 | 37 | 90 | 1248.7 (1043.6 to 1452.5) | 3378.2 (3066.6 to 3734.5) | 2129.6 (1758.5 to 2520.7) | 2.71 (2.24 to 3.25) | 2.51 (1.77 to 3.77) |
| 1460 | 26 | 78 | 1613.0 (1356.1 to 1895.2) | 4479.7 (4101.1 to 4876.0) | 2866.7 (2419.3 to 3350.3) | 2.78 (2.33 to 3.32) | 3.13 (2.08 to 5.30) |
| 1825 | 37 | 59 | 2236.3 (1908.4 to 2569.3) | 5472.1 (4991.1 to 5956.3) | 3235.8 (2682.3 to 3821.3) | 2.45 (2.08 to 2.94) | 1.68 (1.14 to 2.59) |
| 2190 | 27 | 45 | 2770.8 (2369.8 to 3184.7) | 6379.0 (5796.7 to 6913.6) | 3608.2 (2952.0 to 4245.3) | 2.30 (1.97 to 2.74) | 1.76 (1.10 to 3.10) |
| 2555 | 24 | 44 | 3355.2 (2863.3 to 3854.5) | 7439.9 (6814.4 to 8012.1) | 4084.7 (3409.9 to 4811.7) | 2.22 (1.92 to 2.62) | 1.95 (1.32 to 3.21) |
| 2920 | 12 | 28 | 3731.4 (3149.3 to 4233.2) | 8318.3 (7675.4 to 9006.8) | 4586.9 (3792.2 to 5363.6) | 2.23 (1.93 to 2.62) | 2.49 (1.38 to 6.03) |
| 3285 | 12 | 25 | 4240.9 (3589.1 to 4800.1) | 9300.2 (8537.3 to 10035.8) | 5059.3 (4171.0 to 5948.9) | 2.19 (1.90 to 2.58) | 2.24 (1.15 to 6.13) |
| 3650 | 3 | 18 | 4405.8 (3752.5 to 5011.4) | 10356.7 (9471.1 to 11165.0) | 5951.0 (4962.2 to 7003.9) | 2.35 (2.04 to 2.80) | *** |
| 4015 | 5 | 11 | 4908.2 (4126.0 to 5662.4) | 11487.6 (10402.8 to 12515.1) | 6579.4 (5353.4 to 7962.1) | 2.34 (2.01 to 2.87) | *** |
| 4380 | 2 | 5 | 5248.9 (4435.3 to 6234.9) | 12525.6 (11148.7 to 14039.1) | 7276.7 (5714.7 to 8977.4) | 2.39 (1.96 to 2.92) | *** |
| 4745 | 1 | 1 | 5989.4 (4611.4 to 7905.6) | 13396.4 (11504.2 to 15810.6) | 7406.9 (4442.9 to 10221.6) | 2.24 (1.58 to 3.10) | *** |
| 5110 | 1 | 0 | 7532.2 (4880.5 to 11298.3) | 13396.4 (11504.2 to 15810.6) | 5864.2 (1264.6 to 9792.5) | 1.78 (1.12 to 2.92) | *** |
| **Subgroup: Mixed** | | | | | | | |
| 30 | 23 | 62 | 33.2 (21.6 to 47.6) | 89.4 (65.6 to 112.5) | 56.2 (30.2 to 82.2) | 2.69 (1.71 to 4.45) | 2.70 (1.72 to 4.45) |
| 90 | 42 | 142 | 94.8 (73.6 to 119.4) | 297.9 (258.6 to 341.0) | 203.1 (157.0 to 248.4) | 3.14 (2.39 to 4.17) | 3.39 (2.44 to 4.77) |
| 180 | 67 | 174 | 196.0 (169.6 to 236.6) | 560.8 (508.3 to 611.8) | 364.8 (299.2 to 427.2) | 2.86 (2.34 to 3.44) | 2.61 (1.95 to 3.41) |
| 365 | 104 | 358 | 362.4 (323.8 to 411.8) | 1133.5 (1049.1 to 1219.7) | 771.1 (673.2 to 859.6) | 3.13 (2.70 to 3.54) | 3.47 (2.81 to 4.32) |
| 730 | 210 | 493 | 738.8 (678.6 to 809.1) | 2017.8 (1908.0 to 2133.2) | 1279.0 (1136.9 to 1407.9) | 2.73 (2.44 to 3.02) | 2.39 (2.05 to 2.83) |
| 1095 | 194 | 445 | 1145.7 (1057.9 to 1231.4) | 2952.3 (2808.2 to 3088.8) | 1806.6 (1645.3 to 1958.6) | 2.58 (2.35 to 2.79) | 2.35 (1.97 to 2.88) |
| 1460 | 184 | 393 | 1604.5 (1490.1 to 1711.1) | 3936.9 (3743.8 to 4110.2) | 2332.4 (2125.9 to 2517.3) | 2.45 (2.27 to 2.65) | 2.20 (1.87 to 2.61) |
| 1825 | 142 | 294 | 2031.5 (1896.1 to 2158.3) | 4823.7 (4616.7 to 5000.8) | 2792.2 (2532.3 to 3015.7) | 2.37 (2.18 to 2.55) | 2.15 (1.75 to 2.65) |
| 2190 | 106 | 230 | 2413.0 (2275.4 to 2548.1) | 5654.3 (5447.9 to 5863.3) | 3241.2 (2974.2 to 3484.8) | 2.34 (2.18 to 2.51) | 2.27 (1.82 to 2.89) |
| 2555 | 89 | 194 | 2805.0 (2649.5 to 2972.9) | 6512.1 (6274.7 to 6746.7) | 3707.1 (3425.4 to 3998.6) | 2.32 (2.17 to 2.48) | 2.30 (1.81 to 3.03) |
| 2920 | 82 | 151 | 3269.9 (3069.2 to 3464.0) | 7365.7 (7103.9 to 7624.0) | 4095.7 (3752.2 to 4383.1) | 2.25 (2.10 to 2.41) | 1.95 (1.52 to 2.58) |
| 3285 | 65 | 122 | 3764.6 (3537.0 to 3976.0) | 8287.8 (7988.8 to 8574.5) | 4523.2 (4136.4 to 4900.8) | 2.20 (2.06 to 2.36) | 2.00 (1.49 to 2.73) |
| 3650 | 38 | 69 | 4174.8 (3917.4 to 4446.6) | 9054.1 (8721.7 to 9388.0) | 4879.3 (4448.0 to 5266.6) | 2.17 (2.01 to 2.32) | 1.94 (1.39 to 2.93) |
| 4015 | 32 | 53 | 4804.8 (4458.7 to 5179.5) | 10019.8 (9559.9 to 10496.4) | 5215.0 (4686.9 to 5700.1) | 2.09 (1.92 to 2.25) | 1.79 (1.15 to 2.95) |
| 4380 | 16 | 25 | 5411.6 (4955.4 to 5856.2) | 10857.1 (10251.1 to 11422.6) | 5445.5 (4747.3 to 6092.4) | 2.01 (1.82 to 2.21) | 1.69 (0.95 to 3.21) |
| 4745 | 10 | 3 | 6658.0 (5706.3 to 7660.5) | 11187.0 (10557.6 to 11920.1) | 4529.1 (3387.4 to 5562.4) | 1.68 (1.46 to 1.95) | *** |
| 5110 | 1 | 0 | 7054.2 (5918.3 to 8208.9) | 11187.0 (10557.6 to 11920.1) | 4132.8 (2835.9 to 5452.2) | 1.59 (1.34 to 1.89) | *** |
| **Subgroup: HIV** | | | | | | | |
| 30 | 2 | 5 | 33.3 (0.0 to 83.5) | 83.4 (16.7 to 166.6) | 50.1 (-33.4 to 133.6) | *** | *** |
| 90 | 2 | 5 | 67.2 (16.6 to 134.6) | 168.7 (75.5 to 270.4) | 101.6 (-16.6 to 219.5) | *** | *** |
| 180 | 5 | 13 | 154.9 (68.4 to 267.2) | 397.5 (241.3 to 552.8) | 242.6 (52.2 to 414.2) | 2.57 (1.25 to 5.94) | *** |
| 365 | 6 | 22 | 268.1 (141.3 to 425.7) | 808.2 (590.3 to 1064.8) | 540.2 (246.7 to 817.8) | 3.02 (1.72 to 5.73) | 3.80 (1.50 to 13.74) |
| 730 | 10 | 35 | 477.3 (315.9 to 676.1) | 1550.2 (1241.6 to 1851.7) | 1072.9 (700.3 to 1439.8) | 3.25 (2.11 to 5.18) | 3.76 (1.97 to 9.47) |
| 1095 | 14 | 24 | 826.7 (573.5 to 1119.5) | 2170.1 (1821.8 to 2591.7) | 1343.5 (872.8 to 1794.2) | 2.63 (1.83 to 3.81) | 1.91 (1.03 to 4.12) |
| 1460 | 11 | 25 | 1167.6 (841.0 to 1496.6) | 2964.8 (2477.7 to 3440.5) | 1797.2 (1161.9 to 2387.8) | 2.54 (1.81 to 3.58) | 2.65 (1.38 to 6.11) |
| 1825 | 9 | 17 | 1518.8 (1120.8 to 1934.3) | 3625.4 (3050.2 to 4210.9) | 2106.6 (1385.6 to 2741.2) | 2.39 (1.75 to 3.25) | 2.29 (1.11 to 5.50) |
| 2190 | 2 | 11 | 1617.6 (1196.6 to 2093.8) | 4173.2 (3508.9 to 4793.0) | 2555.7 (1721.7 to 3300.8) | 2.58 (1.90 to 3.54) | *** |
| 2555 | 4 | 10 | 1854.8 (1415.6 to 2354.9) | 4806.0 (4034.5 to 5549.7) | 2951.3 (2042.4 to 3830.3) | 2.59 (1.91 to 3.43) | *** |
| 2920 | 3 | 12 | 2073.4 (1564.0 to 2691.6) | 5804.8 (4783.0 to 6757.3) | 3731.4 (2510.0 to 4791.4) | 2.80 (2.03 to 3.81) | *** |
| 3285 | 3 | 6 | 2356.0 (1760.4 to 3022.4) | 6481.1 (5510.2 to 7646.5) | 4125.1 (2900.5 to 5420.2) | 2.75 (2.04 to 3.81) | *** |
| 3650 | 2 | 4 | 2650.8 (2010.6 to 3440.8) | 7187.0 (5945.1 to 8593.6) | 4536.2 (3107.6 to 6053.0) | 2.71 (1.98 to 3.75) | *** |
| 4015 | 1 | 1 | 2977.3 (2067.7 to 4015.0) | 7432.8 (6045.4 to 9049.3) | 4455.5 (2832.5 to 6038.9) | 2.50 (1.73 to 3.52) | *** |
| 4380 | 0 | 1 | 2977.3 (2067.7 to 4015.0) | 7957.4 (6323.5 to 9795.7) | 4980.1 (3070.1 to 6836.2) | 2.67 (1.85 to 3.92) | *** |
| 4745 | 0 | 0 | 2977.3 (2067.7 to 4015.0) | 7957.4 (6323.5 to 9795.7) | 4980.1 (3070.1 to 6836.2) | 2.67 (1.85 to 3.92) | *** |
| 5110 | 0 | 0 | 2977.3 (2067.7 to 4015.0) | 7957.4 (6323.5 to 9795.7) | 4980.1 (3070.1 to 6836.2) | 2.67 (1.85 to 3.92) | *** |
| **Subgroup: Diabetes** | | | | | | | |
| 30 | 7 | 18 | 119.4 (34.2 to 221.5) | 306.8 (187.1 to 443.7) | 187.4 (17.7 to 350.6) | 2.57 (1.11 to 9.13) | 2.57 (1.11 to 9.19) |
| 90 | 5 | 37 | 205.6 (102.6 to 309.1) | 948.6 (723.5 to 1206.1) | 743.0 (466.5 to 1042.5) | 4.61 (2.68 to 10.68) | 7.44 (3.40 to 39.78) |
| 180 | 12 | 38 | 422.3 (264.6 to 578.3) | 1634.6 (1319.3 to 1985.0) | 1212.3 (878.4 to 1650.7) | 3.87 (2.65 to 6.72) | 3.20 (1.92 to 6.90) |
| 365 | 30 | 90 | 1008.3 (758.8 to 1241.7) | 3372.3 (2931.5 to 3882.1) | 2364.0 (1858.6 to 2939.5) | 3.34 (2.58 to 4.46) | 3.07 (2.01 to 5.01) |
| 730 | 37 | 112 | 1842.2 (1505.5 to 2248.7) | 5909.6 (5261.0 to 6520.0) | 4067.4 (3316.3 to 4799.8) | 3.21 (2.53 to 4.06) | 3.13 (2.14 to 4.78) |
| 1095 | 32 | 103 | 2747.5 (2284.3 to 3241.2) | 8746.4 (7833.4 to 9631.7) | 5998.9 (4919.2 to 7034.3) | 3.18 (2.60 to 3.89) | 3.39 (2.28 to 5.49) |
| 1460 | 34 | 108 | 3887.0 (3256.1 to 4483.4) | 12455.7 (11500.1 to 13574.3) | 8568.7 (7435.6 to 9831.3) | 3.20 (2.75 to 3.86) | 3.43 (2.44 to 5.45) |
| 1825 | 28 | 78 | 5073.1 (4276.2 to 5834.7) | 15782.9 (14546.0 to 17149.4) | 10709.8 (9354.8 to 12203.6) | 3.11 (2.66 to 3.69) | 3.10 (2.10 to 4.77) |
| 2190 | 29 | 69 | 6619.3 (5645.0 to 7625.3) | 19466.2 (18043.7 to 20869.0) | 12846.9 (11194.4 to 14468.7) | 2.94 (2.52 to 3.49) | 2.73 (1.85 to 4.47) |
| 2555 | 17 | 45 | 7788.3 (6712.6 to 8876.1) | 22608.1 (21099.2 to 24284.1) | 14819.7 (12988.6 to 16713.6) | 2.90 (2.54 to 3.41) | 3.14 (1.92 to 5.83) |
| 2920 | 16 | 40 | 9349.1 (8148.3 to 10758.7) | 26396.9 (24509.8 to 28280.4) | 17047.8 (14961.0 to 19269.3) | 2.82 (2.44 to 3.29) | 3.04 (1.79 to 5.73) |
| 3285 | 4 | 29 | 9863.5 (8542.1 to 11211.9) | 30315.9 (28136.1 to 32534.5) | 20452.4 (18034.4 to 23211.0) | 3.07 (2.65 to 3.59) | *** |
| 3650 | 6 | 19 | 11088.9 (9513.4 to 12942.5) | 34223.7 (31600.9 to 36932.7) | 23134.9 (20111.0 to 26501.3) | 3.09 (2.62 to 3.72) | 4.38 (2.06 to 15.78) |
| 4015 | 1 | 9 | 11425.4 (9693.4 to 13292.6) | 37498.1 (34021.9 to 40799.1) | 26072.8 (22415.1 to 29871.2) | 3.28 (2.78 to 4.02) | *** |
| 4380 | 1 | 3 | 12026.9 (10068.7 to 14147.4) | 39888.4 (35833.3 to 43727.5) | 27861.5 (23525.2 to 32333.2) | 3.32 (2.75 to 4.07) | *** |
| 4745 | 2 | 0 | 16820.3 (11291.2 to 23936.3) | 39888.4 (35833.3 to 43727.5) | 23068.1 (15300.4 to 30774.3) | 2.37 (1.64 to 3.65) | *** |
| 5110 | 1 | 0 | 24314.2 (11662.6 to 41880.7) | 39888.4 (35833.3 to 43727.5) | 15574.2 (-1745.0 to 29991.1) | 1.64 (0.96 to 3.53) | *** |
| **Subgroup: TB - Pulmonary** | | | | | | | |
| 30 | 35 | 89 | 36.5 (24.5 to 50.1) | 92.9 (74.6 to 112.8) | 56.4 (34.5 to 78.9) | 2.54 (1.78 to 3.90) | 2.54 (1.77 to 3.91) |
| 90 | 57 | 204 | 97.0 (77.5 to 116.9) | 310.0 (277.2 to 343.8) | 212.9 (175.4 to 249.2) | 3.19 (2.55 to 4.11) | 3.59 (2.73 to 4.84) |
| 180 | 87 | 259 | 192.4 (165.8 to 221.6) | 593.8 (545.7 to 642.2) | 401.4 (346.5 to 458.6) | 3.09 (2.61 to 3.68) | 2.99 (2.38 to 3.82) |
| 365 | 158 | 496 | 376.1 (341.8 to 418.5) | 1169.8 (1101.7 to 1237.3) | 793.6 (712.9 to 872.6) | 3.11 (2.78 to 3.47) | 3.17 (2.68 to 3.82) |
| 730 | 293 | 764 | 759.3 (697.3 to 815.7) | 2169.1 (2069.1 to 2265.6) | 1409.8 (1292.9 to 1515.9) | 2.86 (2.63 to 3.14) | 2.65 (2.34 to 3.07) |
| 1095 | 277 | 658 | 1186.5 (1113.5 to 1262.8) | 3182.8 (3054.7 to 3308.7) | 1996.3 (1842.9 to 2134.7) | 2.68 (2.49 to 2.89) | 2.44 (2.12 to 2.81) |
| 1460 | 253 | 580 | 1652.3 (1563.6 to 1749.9) | 4257.5 (4104.4 to 4396.3) | 2605.1 (2428.9 to 2769.0) | 2.58 (2.42 to 2.75) | 2.37 (2.02 to 2.76) |
| 1825 | 220 | 441 | 2144.8 (2030.1 to 2258.2) | 5245.6 (5057.9 to 5407.8) | 3100.7 (2881.1 to 3302.1) | 2.45 (2.30 to 2.60) | 2.09 (1.77 to 2.48) |
| 2190 | 159 | 364 | 2571.5 (2447.1 to 2695.7) | 6226.8 (6020.0 to 6414.4) | 3655.4 (3412.0 to 3875.2) | 2.42 (2.28 to 2.57) | 2.41 (2.03 to 2.93) |
| 2555 | 123 | 281 | 2974.4 (2822.2 to 3124.5) | 7153.8 (6908.7 to 7357.0) | 4179.4 (3910.9 to 4431.4) | 2.41 (2.28 to 2.55) | 2.42 (2.02 to 3.03) |
| 2920 | 116 | 220 | 3465.9 (3280.8 to 3634.6) | 8084.0 (7813.0 to 8330.2) | 4618.1 (4315.7 to 4937.1) | 2.33 (2.21 to 2.48) | 2.03 (1.64 to 2.60) |
| 3285 | 87 | 171 | 3955.7 (3733.9 to 4156.0) | 9034.6 (8712.6 to 9297.8) | 5079.0 (4734.9 to 5424.7) | 2.28 (2.16 to 2.42) | 2.11 (1.68 to 2.70) |
| 3650 | 52 | 116 | 4370.8 (4125.0 to 4619.6) | 9980.2 (9624.3 to 10325.1) | 5609.4 (5221.2 to 5993.9) | 2.28 (2.15 to 2.44) | 2.41 (1.72 to 3.36) |
| 4015 | 38 | 68 | 4915.2 (4628.2 to 5218.7) | 10907.3 (10518.5 to 11337.7) | 5992.1 (5549.7 to 6468.3) | 2.22 (2.08 to 2.39) | 1.95 (1.33 to 2.97) |
| 4380 | 17 | 35 | 5369.2 (4990.5 to 5737.6) | 11804.0 (11316.6 to 12374.5) | 6434.8 (5821.7 to 7146.7) | 2.20 (2.03 to 2.40) | 2.25 (1.30 to 4.62) |
| 4745 | 10 | 4 | 6261.0 (5638.1 to 6942.3) | 12180.8 (11588.3 to 12878.8) | 5919.8 (5055.6 to 6857.8) | 1.95 (1.74 to 2.18) | *** |
| 5110 | 2 | 0 | 6799.3 (5885.9 to 7784.4) | 12180.8 (11588.3 to 12878.8) | 5381.5 (4231.5 to 6474.7) | 1.79 (1.55 to 2.09) | *** |
| **Subgroup: TB - Extrapulmonary** | | | | | | | |
| 30 | 3 | 15 | 23.0 (0.0 to 46.2) | 114.9 (61.4 to 176.3) | 91.9 (30.6 to 153.3) | *** | *** |
| 90 | 3 | 30 | 46.6 (11.5 to 92.5) | 349.4 (248.9 to 451.2) | 302.8 (194.7 to 419.9) | 7.50 (3.57 to 33.38) | *** |
| 180 | 13 | 31 | 150.9 (87.1 to 222.3) | 599.4 (474.7 to 733.5) | 448.5 (299.3 to 614.3) | 3.97 (2.53 to 7.33) | 2.40 (1.32 to 5.03) |
| 365 | 14 | 54 | 269.6 (176.3 to 375.7) | 1060.9 (901.3 to 1251.7) | 791.3 (602.3 to 1003.7) | 3.94 (2.77 to 6.18) | 3.90 (2.23 to 7.78) |
| 730 | 38 | 86 | 635.2 (489.5 to 772.2) | 1886.3 (1660.5 to 2161.4) | 1251.0 (989.8 to 1564.2) | 2.97 (2.34 to 4.07) | 2.30 (1.65 to 3.48) |
| 1095 | 35 | 62 | 1037.0 (826.3 to 1235.2) | 2596.6 (2290.9 to 2905.9) | 1559.5 (1205.5 to 1936.9) | 2.50 (2.05 to 3.22) | 1.82 (1.22 to 2.70) |
| 1460 | 37 | 50 | 1549.8 (1302.8 to 1801.0) | 3288.4 (2930.6 to 3631.7) | 1738.6 (1292.2 to 2160.9) | 2.12 (1.77 to 2.59) | 1.40 (0.91 to 2.15) |
| 1825 | 18 | 36 | 1854.7 (1563.1 to 2141.0) | 3909.3 (3482.9 to 4280.9) | 2054.6 (1558.7 to 2501.4) | 2.11 (1.76 to 2.54) | 2.07 (1.16 to 3.66) |
| 2190 | 14 | 30 | 2139.7 (1831.3 to 2457.0) | 4526.6 (4093.8 to 4917.3) | 2386.9 (1851.5 to 2877.3) | 2.12 (1.79 to 2.48) | 2.24 (1.27 to 4.55) |
| 2555 | 18 | 15 | 2600.5 (2234.5 to 2963.8) | 4895.2 (4417.2 to 5355.3) | 2294.7 (1703.1 to 2885.1) | 1.88 (1.59 to 2.25) | 0.87 (0.40 to 1.85) |
| 2920 | 12 | 22 | 2999.8 (2567.9 to 3433.9) | 5617.8 (5073.8 to 6158.9) | 2618.0 (1928.6 to 3310.1) | 1.87 (1.59 to 2.22) | 1.93 (1.00 to 4.64) |
| 3285 | 9 | 17 | 3404.8 (2907.9 to 3936.7) | 6376.8 (5721.3 to 7044.7) | 2972.0 (2168.8 to 3737.4) | 1.87 (1.57 to 2.21) | 2.01 (0.88 to 5.08) |
| 3650 | 5 | 10 | 3715.4 (3193.5 to 4320.3) | 6999.9 (6209.2 to 7722.8) | 3284.4 (2335.9 to 4112.2) | 1.88 (1.55 to 2.19) | *** |
| 4015 | 3 | 7 | 4086.6 (3512.4 to 4826.3) | 7787.1 (6846.7 to 8793.3) | 3700.5 (2512.8 to 4839.0) | 1.91 (1.55 to 2.29) | *** |
| 4380 | 2 | 2 | 4406.7 (3684.7 to 5259.4) | 8199.5 (7145.2 to 9455.1) | 3792.8 (2401.9 to 5169.2) | 1.86 (1.48 to 2.30) | *** |
| 4745 | 1 | 1 | 4917.0 (3841.2 to 6249.5) | 8666.6 (7441.8 to 10295.4) | 3749.6 (1833.5 to 5491.0) | 1.76 (1.31 to 2.36) | *** |
| 5110 | 0 | 0 | 4917.0 (3841.2 to 6249.5) | 8666.6 (7441.8 to 10295.4) | 3749.6 (1833.5 to 5491.0) | 1.76 (1.31 to 2.36) | *** |
| **Subgroup: TB - Pulmonary+Extrapulmonary** | | | | | | | |
| 30 | 1 | 2 | 41.3 (0.0 to 165.1) | 82.7 (0.0 to 207.3) | 41.4 (-82.9 to 206.9) | *** | *** |
| 90 | 5 | 6 | 251.9 (83.4 to 461.3) | 335.1 (125.4 to 565.8) | 83.1 (-252.4 to 418.0) | *** | *** |
| 180 | 4 | 9 | 424.6 (171.2 to 702.8) | 724.9 (423.1 to 1063.2) | 300.3 (-126.1 to 731.2) | 1.71 (0.81 to 4.48) | *** |
| 365 | 0 | 11 | 424.6 (171.2 to 702.8) | 1224.9 (787.4 to 1670.2) | 800.3 (267.3 to 1320.9) | 2.89 (1.50 to 7.31) | *** |
| 730 | 10 | 30 | 938.7 (548.7 to 1369.2) | 2761.1 (2122.4 to 3409.5) | 1822.4 (994.9 to 2566.5) | 2.94 (1.85 to 4.95) | 3.10 (1.52 to 7.41) |
| 1095 | 8 | 19 | 1424.6 (944.8 to 1940.2) | 3894.4 (3055.2 to 4689.1) | 2469.8 (1539.2 to 3453.1) | 2.73 (1.87 to 4.23) | 2.49 (1.16 to 7.52) |
| 1460 | 4 | 11 | 1716.9 (1127.9 to 2323.1) | 4690.4 (3797.6 to 5630.0) | 2973.5 (1871.0 to 3919.5) | 2.73 (1.92 to 4.14) | *** |
| 1825 | 5 | 7 | 2167.8 (1523.1 to 2877.0) | 5319.0 (4264.0 to 6384.2) | 3151.1 (1819.3 to 4157.8) | 2.45 (1.71 to 3.46) | *** |
| 2190 | 1 | 7 | 2271.5 (1633.2 to 2976.0) | 6083.6 (4841.5 to 7249.3) | 3812.2 (2282.4 to 4951.6) | 2.68 (1.87 to 3.92) | *** |
| 2555 | 3 | 4 | 2654.1 (1861.8 to 3522.5) | 6594.1 (5247.9 to 7858.6) | 3940.0 (2397.3 to 5262.1) | 2.48 (1.74 to 3.55) | *** |
| 2920 | 1 | 4 | 2836.3 (1981.0 to 3707.9) | 7300.3 (5872.4 to 8728.0) | 4464.0 (2668.9 to 6002.2) | 2.57 (1.78 to 3.85) | *** |
| 3285 | 0 | 3 | 2836.3 (1981.0 to 3707.9) | 8015.4 (6389.6 to 9599.9) | 5179.1 (3287.2 to 6892.0) | 2.83 (1.98 to 4.28) | *** |
| 3650 | 3 | 1 | 3792.8 (2518.7 to 5124.8) | 8352.7 (6633.3 to 10054.8) | 4559.9 (2191.1 to 6625.0) | 2.20 (1.46 to 3.46) | *** |
| 4015 | 1 | 3 | 4245.6 (2780.2 to 5976.1) | 9872.9 (7540.5 to 12396.7) | 5627.3 (2586.0 to 8519.1) | 2.33 (1.49 to 3.68) | *** |
| 4380 | 2 | 1 | 6293.9 (3499.8 to 10034.0) | 10908.4 (8014.5 to 14446.3) | 4614.6 (39.6 to 9461.8) | 1.73 (1.00 to 3.31) | *** |
| 4745 | 1 | 0 | 9722.5 (4212.8 to 18394.1) | 10908.4 (8014.5 to 14446.3) | 1185.9 (-8230.4 to 7477.5) | 1.12 (0.54 to 2.59) | *** |
| 5110 | 0 | 0 | 9722.5 (4212.8 to 18394.1) | 10908.4 (8014.5 to 14446.3) | 1185.9 (-8230.4 to 7477.5) | 1.12 (0.54 to 2.59) | *** |

*** IRR/RR was not estimated when there were fewer than 20 events in the risk period or fewer than 5 events in one group.

# Supplementary Table 11. Estimated risk of death by cause-specific (defined by ICD-10 chapters) comparing diagnosed Tuberculosis cases compared to non-exposed controls in Females.

|  | **Number of events** | | **Risk per 100,000** | |  |  |  |
| --- | --- | --- | --- | --- | --- | --- | --- |
| **Time - Days** | **Unexposed** | **Exposed** | **Unexposed** | **Exposed** | **Risk difference per 100,000 - 95% CI** | **Risk ratio - 95% CI** | **Incidence rate ratio - 95% CI** |
| **Cause: All-cause** | | | | | | | |
| 30 | 17 | 1601 | 24.9 (13.2 to 36.7) | 2344.3 (2234.9 to 2454.9) | 2319.4 (2211.3 to 2430.7) | 94.04 (63.24 to 172.24) | 95.56 (64.27 to 175.11) |
| 90 | 34 | 947 | 75.5 (56.2 to 96.4) | 3752.5 (3611.4 to 3898.4) | 3676.9 (3532.4 to 3824.9) | 49.68 (38.27 to 66.07) | 28.75 (21.08 to 41.34) |
| 180 | 49 | 620 | 150.6 (120.4 to 181.9) | 4700.8 (4550.5 to 4854.0) | 4550.2 (4391.0 to 4702.9) | 31.22 (26.07 to 39.30) | 13.20 (9.90 to 18.00) |
| 365 | 104 | 686 | 318.5 (275.1 to 361.1) | 5802.7 (5621.7 to 5986.7) | 5484.2 (5292.6 to 5668.6) | 18.22 (16.07 to 21.13) | 6.95 (5.81 to 8.77) |
| 730 | 171 | 873 | 620.6 (552.2 to 676.7) | 7338.9 (7126.8 to 7535.6) | 6718.3 (6509.5 to 6930.0) | 11.83 (10.83 to 13.30) | 5.44 (4.73 to 6.49) |
| 1095 | 192 | 531 | 1006.5 (918.4 to 1079.7) | 8409.7 (8198.2 to 8632.3) | 7403.2 (7174.9 to 7638.6) | 8.36 (7.76 to 9.13) | 2.97 (2.55 to 3.58) |
| 1460 | 155 | 441 | 1366.6 (1268.0 to 1467.3) | 9431.7 (9193.0 to 9664.1) | 8065.1 (7840.4 to 8322.2) | 6.90 (6.44 to 7.42) | 3.08 (2.63 to 3.73) |
| 1825 | 148 | 368 | 1767.2 (1653.2 to 1886.3) | 10420.8 (10151.8 to 10688.7) | 8653.6 (8369.8 to 8923.2) | 5.90 (5.53 to 6.33) | 2.71 (2.29 to 3.28) |
| 2190 | 104 | 267 | 2102.7 (1965.5 to 2231.9) | 11278.8 (11016.8 to 11558.8) | 9176.1 (8898.2 to 9453.7) | 5.36 (5.05 to 5.72) | 2.81 (2.27 to 3.52) |
| 2555 | 103 | 232 | 2509.5 (2351.6 to 2662.8) | 12189.8 (11886.6 to 12484.2) | 9680.4 (9389.7 to 10003.5) | 4.86 (4.57 to 5.18) | 2.48 (1.99 to 3.06) |
| 2920 | 81 | 159 | 2908.4 (2708.9 to 3084.9) | 12966.0 (12647.7 to 13286.1) | 10057.6 (9709.8 to 10372.9) | 4.46 (4.20 to 4.77) | 2.18 (1.68 to 2.84) |
| 3285 | 60 | 135 | 3293.4 (3094.6 to 3491.2) | 13830.6 (13457.5 to 14181.2) | 10537.2 (10150.9 to 10886.7) | 4.20 (3.93 to 4.47) | 2.50 (1.88 to 3.45) |
| 3650 | 48 | 98 | 3709.1 (3475.7 to 3927.6) | 14668.5 (14264.6 to 15065.3) | 10959.4 (10528.7 to 11340.5) | 3.95 (3.71 to 4.22) | 2.28 (1.67 to 3.45) |
| 4015 | 35 | 64 | 4166.9 (3896.1 to 4431.3) | 15464.9 (15040.4 to 15913.3) | 11298.1 (10846.6 to 11752.0) | 3.71 (3.47 to 3.97) | 2.05 (1.36 to 3.19) |
| 4380 | 22 | 36 | 4681.0 (4337.9 to 5004.2) | 16288.3 (15788.8 to 16824.8) | 11607.3 (11063.2 to 12207.7) | 3.48 (3.24 to 3.78) | 1.86 (1.13 to 3.22) |
| 4745 | 5 | 16 | 4989.3 (4541.4 to 5424.5) | 17182.2 (16584.1 to 17887.4) | 12192.9 (11478.1 to 12986.4) | 3.44 (3.17 to 3.80) | 3.69 (1.59 to 19.29) |
| 5110 | 2 | 4 | 5220.7 (4684.7 to 5780.1) | 17785.3 (16930.5 to 18777.8) | 12564.6 (11613.8 to 13639.4) | 3.41 (3.05 to 3.84) | *** |
| **Cause: Natural - excluding (HIV/TB and external causes)** | | | | | | | |
| 30 | 17 | 498 | 24.9 (13.2 to 36.7) | 729.5 (667.2 to 794.8) | 704.6 (641.6 to 770.6) | 29.26 (19.56 to 52.95) | 29.72 (19.86 to 53.81) |
| 90 | 30 | 354 | 69.6 (50.5 to 89.6) | 1256.0 (1176.6 to 1334.2) | 1186.4 (1101.5 to 1270.5) | 18.05 (13.82 to 24.33) | 12.18 (8.94 to 18.31) |
| 180 | 45 | 264 | 138.5 (109.8 to 167.7) | 1659.9 (1564.2 to 1756.3) | 1521.4 (1420.3 to 1617.9) | 11.98 (9.95 to 15.08) | 6.12 (4.45 to 8.49) |
| 365 | 92 | 334 | 287.1 (243.6 to 327.9) | 2196.9 (2084.1 to 2305.1) | 1909.7 (1793.2 to 2023.7) | 7.65 (6.69 to 9.05) | 3.82 (3.11 to 4.94) |
| 730 | 148 | 485 | 548.6 (488.6 to 599.3) | 3050.6 (2920.2 to 3184.5) | 2502.0 (2368.5 to 2643.9) | 5.56 (5.03 to 6.27) | 3.49 (2.96 to 4.22) |
| 1095 | 169 | 338 | 888.5 (809.6 to 962.8) | 3733.8 (3580.0 to 3881.2) | 2845.3 (2680.5 to 3001.7) | 4.20 (3.86 to 4.63) | 2.15 (1.80 to 2.63) |
| 1460 | 135 | 303 | 1202.3 (1115.3 to 1293.2) | 4435.5 (4270.5 to 4584.1) | 3233.1 (3060.8 to 3419.7) | 3.69 (3.42 to 4.03) | 2.43 (2.01 to 3.03) |
| 1825 | 130 | 256 | 1553.5 (1442.9 to 1662.2) | 5124.2 (4940.5 to 5301.7) | 3570.7 (3374.9 to 3772.2) | 3.30 (3.07 to 3.56) | 2.15 (1.76 to 2.66) |
| 2190 | 95 | 186 | 1860.2 (1730.8 to 1988.8) | 5719.8 (5520.7 to 5928.9) | 3859.7 (3656.1 to 4081.1) | 3.07 (2.88 to 3.31) | 2.15 (1.69 to 2.72) |
| 2555 | 91 | 173 | 2219.8 (2069.5 to 2369.1) | 6399.8 (6178.3 to 6627.3) | 4180.0 (3932.5 to 4432.4) | 2.88 (2.70 to 3.10) | 2.09 (1.64 to 2.69) |
| 2920 | 71 | 115 | 2570.4 (2391.1 to 2724.5) | 6965.8 (6703.1 to 7214.4) | 4395.4 (4120.7 to 4657.6) | 2.71 (2.54 to 2.91) | 1.80 (1.32 to 2.35) |
| 3285 | 55 | 106 | 2924.5 (2738.3 to 3126.0) | 7645.5 (7349.5 to 7920.0) | 4721.1 (4399.2 to 5019.7) | 2.61 (2.44 to 2.80) | 2.14 (1.58 to 2.98) |
| 3650 | 44 | 78 | 3301.6 (3067.9 to 3516.3) | 8310.9 (7997.5 to 8632.3) | 5009.3 (4670.1 to 5362.7) | 2.52 (2.35 to 2.71) | 1.98 (1.42 to 2.96) |
| 4015 | 30 | 55 | 3699.0 (3430.8 to 3949.9) | 8996.6 (8606.8 to 9336.0) | 5297.6 (4898.9 to 5681.2) | 2.43 (2.26 to 2.63) | 2.06 (1.38 to 3.34) |
| 4380 | 21 | 32 | 4193.0 (3884.3 to 4520.7) | 9741.1 (9296.4 to 10181.8) | 5548.1 (5034.6 to 6090.6) | 2.32 (2.14 to 2.54) | 1.73 (1.05 to 3.08) |
| 4745 | 5 | 13 | 4501.3 (4066.4 to 4932.1) | 10464.9 (9888.6 to 11067.9) | 5963.6 (5287.7 to 6715.9) | 2.32 (2.10 to 2.60) | *** |
| 5110 | 2 | 4 | 4732.7 (4203.8 to 5284.3) | 11068.1 (10260.7 to 12066.8) | 6335.4 (5319.8 to 7335.9) | 2.34 (2.04 to 2.69) | *** |
| **Cause: Cancer** | | | | | | | |
| 30 | 3 | 81 | 4.4 (0.0 to 9.6) | 118.7 (93.8 to 142.2) | 114.3 (89.4 to 138.6) | *** | *** |
| 90 | 4 | 99 | 10.4 (3.0 to 17.8) | 266.1 (229.3 to 305.9) | 255.7 (217.6 to 296.1) | 25.69 (14.76 to 83.91) | *** |
| 180 | 9 | 86 | 24.1 (12.1 to 36.3) | 397.6 (350.4 to 444.3) | 373.5 (325.2 to 421.1) | 16.50 (10.69 to 31.63) | 9.97 (5.43 to 24.01) |
| 365 | 18 | 98 | 53.2 (37.2 to 72.5) | 554.8 (498.2 to 610.6) | 501.6 (444.9 to 558.0) | 10.43 (7.71 to 14.93) | 5.73 (3.77 to 10.57) |
| 730 | 35 | 105 | 114.7 (89.5 to 142.6) | 739.2 (674.9 to 810.5) | 624.4 (563.4 to 699.7) | 6.44 (5.17 to 8.38) | 3.20 (2.25 to 4.71) |
| 1095 | 44 | 65 | 203.5 (164.1 to 242.3) | 870.1 (801.1 to 946.6) | 666.6 (594.5 to 756.0) | 4.28 (3.55 to 5.44) | 1.59 (1.13 to 2.38) |
| 1460 | 32 | 51 | 277.9 (233.2 to 325.7) | 988.0 (911.7 to 1066.4) | 710.1 (625.4 to 803.4) | 3.55 (3.00 to 4.35) | 1.73 (1.18 to 2.81) |
| 1825 | 32 | 49 | 365.2 (309.6 to 419.9) | 1119.6 (1033.7 to 1210.1) | 754.4 (650.3 to 861.1) | 3.07 (2.62 to 3.66) | 1.67 (1.06 to 2.65) |
| 2190 | 18 | 26 | 424.4 (369.5 to 482.5) | 1202.6 (1110.8 to 1297.7) | 778.2 (672.8 to 889.6) | 2.83 (2.41 to 3.37) | 1.58 (0.89 to 2.91) |
| 2555 | 12 | 30 | 472.0 (407.8 to 540.6) | 1319.8 (1219.8 to 1428.4) | 847.8 (734.4 to 969.9) | 2.80 (2.42 to 3.34) | 2.75 (1.51 to 6.28) |
| 2920 | 18 | 24 | 562.8 (491.4 to 639.9) | 1434.8 (1321.1 to 1551.2) | 872.1 (734.1 to 1018.3) | 2.55 (2.18 to 3.01) | 1.48 (0.76 to 2.58) |
| 3285 | 10 | 16 | 626.7 (543.6 to 719.9) | 1536.2 (1401.2 to 1652.2) | 909.5 (760.5 to 1053.3) | 2.45 (2.11 to 2.85) | 1.78 (0.85 to 4.45) |
| 3650 | 13 | 12 | 739.2 (627.4 to 850.4) | 1639.2 (1500.9 to 1769.8) | 900.0 (721.5 to 1076.7) | 2.22 (1.88 to 2.65) | 1.03 (0.46 to 2.45) |
| 4015 | 12 | 4 | 895.1 (754.9 to 1027.5) | 1689.7 (1545.1 to 1840.3) | 794.7 (602.3 to 995.2) | 1.89 (1.61 to 2.25) | *** |
| 4380 | 7 | 5 | 1054.3 (862.1 to 1238.4) | 1788.7 (1608.8 to 1970.5) | 734.4 (486.6 to 1008.1) | 1.70 (1.40 to 2.13) | *** |
| 4745 | 1 | 2 | 1122.5 (894.1 to 1371.2) | 1900.8 (1701.0 to 2146.4) | 778.3 (455.6 to 1098.5) | 1.69 (1.33 to 2.20) | *** |
| 5110 | 0 | 1 | 1122.5 (894.1 to 1371.2) | 2033.3 (1728.8 to 2450.8) | 910.8 (534.3 to 1363.6) | 1.81 (1.42 to 2.42) | *** |
| **Cause: Cardiovascular** | | | | | | | |
| 30 | 4 | 64 | 5.9 (1.5 to 11.7) | 93.7 (72.5 to 117.2) | 87.9 (66.0 to 112.1) | *** | *** |
| 90 | 10 | 52 | 20.7 (11.9 to 32.6) | 171.1 (143.1 to 201.4) | 150.4 (116.6 to 180.7) | 8.25 (4.96 to 15.59) | 5.37 (2.87 to 11.92) |
| 180 | 17 | 39 | 46.7 (33.2 to 64.8) | 230.8 (197.0 to 268.1) | 184.1 (144.1 to 225.0) | 4.94 (3.44 to 7.17) | 2.39 (1.39 to 4.55) |
| 365 | 28 | 55 | 92.2 (70.6 to 114.5) | 319.2 (279.5 to 363.5) | 227.0 (182.2 to 276.4) | 3.46 (2.64 to 4.60) | 2.07 (1.34 to 3.27) |
| 730 | 46 | 90 | 173.3 (142.4 to 205.7) | 477.3 (429.4 to 530.7) | 304.0 (248.3 to 366.8) | 2.75 (2.29 to 3.39) | 2.08 (1.46 to 2.95) |
| 1095 | 54 | 72 | 282.5 (242.7 to 323.4) | 623.7 (562.7 to 692.5) | 341.2 (270.3 to 414.6) | 2.21 (1.87 to 2.65) | 1.43 (1.02 to 2.06) |
| 1460 | 42 | 77 | 380.9 (332.1 to 431.1) | 803.1 (728.0 to 884.1) | 422.2 (341.0 to 511.2) | 2.11 (1.82 to 2.47) | 1.99 (1.40 to 3.09) |
| 1825 | 46 | 60 | 504.2 (440.9 to 567.0) | 965.2 (874.5 to 1054.0) | 461.0 (361.4 to 563.6) | 1.91 (1.66 to 2.23) | 1.42 (0.95 to 2.06) |
| 2190 | 33 | 47 | 611.1 (536.1 to 690.3) | 1115.2 (1018.5 to 1216.8) | 504.0 (388.3 to 622.4) | 1.82 (1.58 to 2.13) | 1.56 (0.96 to 2.43) |
| 2555 | 35 | 36 | 751.5 (671.1 to 842.1) | 1255.8 (1153.5 to 1364.2) | 504.4 (368.2 to 653.8) | 1.67 (1.45 to 1.92) | 1.13 (0.72 to 1.78) |
| 2920 | 16 | 28 | 831.5 (746.5 to 926.9) | 1395.1 (1280.1 to 1511.5) | 563.6 (412.1 to 714.1) | 1.68 (1.45 to 1.92) | 1.94 (1.11 to 3.67) |
| 3285 | 20 | 18 | 961.3 (869.6 to 1086.4) | 1513.4 (1384.8 to 1648.9) | 552.0 (374.2 to 706.3) | 1.57 (1.36 to 1.77) | 1.00 (0.54 to 1.92) |
| 3650 | 17 | 22 | 1108.8 (985.4 to 1258.5) | 1703.0 (1557.4 to 1853.2) | 594.2 (391.2 to 773.9) | 1.54 (1.32 to 1.76) | 1.45 (0.82 to 2.92) |
| 4015 | 5 | 16 | 1171.2 (1041.7 to 1324.9) | 1899.9 (1722.1 to 2080.0) | 728.7 (504.9 to 945.8) | 1.62 (1.38 to 1.87) | 3.59 (1.60 to 15.97) |
| 4380 | 5 | 11 | 1288.4 (1120.6 to 1478.1) | 2174.2 (1946.9 to 2439.8) | 885.8 (583.7 to 1205.0) | 1.69 (1.40 to 2.00) | *** |
| 4745 | 1 | 2 | 1324.1 (1145.8 to 1516.0) | 2286.0 (2031.6 to 2631.3) | 961.9 (630.9 to 1381.1) | 1.73 (1.42 to 2.14) | *** |
| 5110 | 1 | 1 | 1457.0 (1178.6 to 1830.5) | 2478.1 (2061.4 to 3000.3) | 1021.0 (433.6 to 1661.0) | 1.70 (1.25 to 2.29) | *** |
| **Cause: Endocrine** | | | | | | | |
| 30 | 1 | 21 | 1.5 (0.0 to 4.4) | 30.8 (17.6 to 44.0) | 29.3 (16.1 to 43.9) | *** | *** |
| 90 | 3 | 22 | 5.9 (1.5 to 11.9) | 63.5 (44.4 to 82.6) | 57.5 (38.4 to 76.9) | *** | *** |
| 180 | 3 | 11 | 10.5 (3.0 to 19.3) | 80.3 (59.5 to 101.4) | 69.8 (47.4 to 92.2) | 7.67 (3.97 to 24.96) | *** |
| 365 | 6 | 26 | 20.2 (10.7 to 32.5) | 122.1 (96.2 to 148.1) | 101.9 (72.8 to 129.7) | 6.04 (3.59 to 12.26) | 4.56 (2.30 to 14.78) |
| 730 | 19 | 41 | 54.0 (35.0 to 74.6) | 194.1 (160.8 to 230.0) | 140.1 (99.9 to 181.6) | 3.59 (2.45 to 5.56) | 2.30 (1.44 to 4.27) |
| 1095 | 9 | 31 | 72.2 (51.0 to 94.8) | 256.4 (216.0 to 297.2) | 184.2 (137.3 to 231.7) | 3.55 (2.58 to 5.08) | 3.70 (1.92 to 8.59) |
| 1460 | 14 | 25 | 104.8 (78.5 to 131.7) | 314.3 (269.5 to 363.4) | 209.5 (157.6 to 262.8) | 3.00 (2.24 to 4.12) | 1.93 (1.00 to 4.09) |
| 1825 | 12 | 20 | 137.1 (103.9 to 172.0) | 369.0 (316.3 to 422.7) | 231.9 (170.4 to 296.4) | 2.69 (2.02 to 3.61) | 1.82 (0.87 to 4.05) |
| 2190 | 10 | 23 | 169.3 (131.9 to 208.3) | 442.3 (380.6 to 499.9) | 273.0 (202.3 to 344.6) | 2.61 (2.04 to 3.45) | 2.52 (1.21 to 6.38) |
| 2555 | 9 | 14 | 204.5 (162.6 to 251.7) | 497.4 (431.8 to 563.7) | 292.9 (213.9 to 373.9) | 2.43 (1.89 to 3.18) | 1.71 (0.74 to 4.40) |
| 2920 | 5 | 12 | 228.6 (181.6 to 280.5) | 557.1 (483.3 to 629.9) | 328.5 (240.2 to 416.3) | 2.44 (1.92 to 3.13) | *** |
| 3285 | 2 | 19 | 240.6 (191.3 to 295.2) | 680.6 (588.6 to 769.8) | 440.0 (332.6 to 549.8) | 2.83 (2.21 to 3.69) | *** |
| 3650 | 3 | 9 | 265.2 (207.7 to 326.6) | 759.7 (661.0 to 867.0) | 494.5 (380.1 to 613.7) | 2.86 (2.24 to 3.78) | *** |
| 4015 | 1 | 10 | 277.4 (213.4 to 345.5) | 885.5 (765.3 to 1020.9) | 608.1 (476.1 to 761.9) | 3.19 (2.51 to 4.30) | *** |
| 4380 | 0 | 3 | 277.4 (213.4 to 345.5) | 958.4 (810.8 to 1124.3) | 681.0 (512.3 to 857.6) | 3.45 (2.65 to 4.65) | *** |
| 4745 | 0 | 3 | 277.4 (213.4 to 345.5) | 1095.4 (898.5 to 1317.1) | 818.0 (610.7 to 1050.9) | 3.95 (2.97 to 5.34) | *** |
| 5110 | 1 | 0 | 375.9 (228.7 to 617.0) | 1095.4 (898.5 to 1317.1) | 719.6 (426.7 to 983.5) | 2.91 (1.73 to 4.92) | *** |
| **Cause: Respiratory** | | | | | | | |
| 30 | 4 | 135 | 5.9 (1.5 to 13.2) | 197.7 (166.2 to 231.4) | 191.9 (159.7 to 225.5) | *** | *** |
| 90 | 1 | 54 | 7.3 (1.5 to 14.7) | 278.0 (241.4 to 317.7) | 270.7 (233.1 to 310.3) | 37.84 (18.73 to 189.39) | *** |
| 180 | 7 | 51 | 18.1 (9.0 to 30.1) | 356.2 (311.9 to 399.6) | 338.1 (293.9 to 382.5) | 19.63 (11.92 to 42.99) | 7.60 (3.71 to 25.27) |
| 365 | 14 | 61 | 40.6 (26.1 to 56.4) | 454.6 (404.3 to 503.1) | 414.0 (363.7 to 465.4) | 11.20 (8.07 to 17.88) | 4.59 (2.86 to 9.04) |
| 730 | 9 | 103 | 56.7 (38.5 to 76.5) | 635.6 (573.2 to 697.0) | 578.9 (515.7 to 640.6) | 11.21 (8.22 to 16.50) | 12.20 (6.82 to 27.83) |
| 1095 | 24 | 61 | 104.8 (77.5 to 133.4) | 758.4 (692.4 to 827.0) | 653.7 (582.0 to 725.9) | 7.24 (5.52 to 9.94) | 2.73 (1.77 to 4.65) |
| 1460 | 18 | 58 | 146.7 (113.5 to 182.5) | 891.6 (819.6 to 969.0) | 744.9 (662.6 to 828.0) | 6.08 (4.78 to 7.85) | 3.49 (2.14 to 7.09) |
| 1825 | 16 | 59 | 190.2 (151.7 to 230.7) | 1051.3 (964.7 to 1142.8) | 861.1 (762.9 to 961.5) | 5.53 (4.43 to 6.99) | 4.02 (2.26 to 7.72) |
| 2190 | 15 | 34 | 238.0 (191.0 to 285.9) | 1159.0 (1068.5 to 1254.0) | 921.0 (813.0 to 1026.9) | 4.87 (3.98 to 6.19) | 2.48 (1.46 to 4.88) |
| 2555 | 12 | 34 | 285.3 (228.0 to 338.1) | 1294.8 (1197.8 to 1393.2) | 1009.5 (892.6 to 1133.3) | 4.54 (3.73 to 5.72) | 3.12 (1.80 to 6.91) |
| 2920 | 8 | 20 | 324.2 (262.7 to 383.4) | 1393.8 (1289.2 to 1505.6) | 1069.6 (936.0 to 1197.8) | 4.30 (3.53 to 5.35) | 2.77 (1.22 to 7.05) |
| 3285 | 10 | 25 | 390.0 (316.2 to 463.4) | 1549.7 (1430.1 to 1683.7) | 1159.7 (1010.7 to 1307.9) | 3.97 (3.25 to 5.02) | 2.78 (1.45 to 7.92) |
| 3650 | 2 | 17 | 405.5 (331.3 to 481.5) | 1686.7 (1558.8 to 1819.7) | 1281.2 (1125.3 to 1435.7) | 4.16 (3.45 to 5.22) | *** |
| 4015 | 3 | 8 | 442.8 (349.2 to 532.5) | 1788.2 (1633.4 to 1945.2) | 1345.5 (1169.4 to 1517.8) | 4.04 (3.28 to 5.24) | *** |
| 4380 | 5 | 3 | 564.0 (434.3 to 713.6) | 1873.0 (1713.1 to 2057.3) | 1309.0 (1059.8 to 1525.8) | 3.32 (2.57 to 4.39) | *** |
| 4745 | 3 | 2 | 768.3 (528.7 to 1087.8) | 2018.4 (1783.0 to 2312.4) | 1250.1 (850.7 to 1618.5) | 2.63 (1.84 to 3.90) | *** |
| 5110 | 0 | 1 | 768.3 (528.7 to 1087.8) | 2148.2 (1793.6 to 2531.5) | 1379.9 (886.2 to 1862.9) | 2.80 (1.90 to 4.20) | *** |
| **Cause: External** | | | | | | | |
| 30 | 0 | 7 | 0.0 (0.0 to 0.0) | 10.3 (2.9 to 19.1) | 10.3 (2.9 to 19.1) | *** | *** |
| 90 | 3 | 11 | 4.5 (0.0 to 10.4) | 26.6 (14.8 to 41.4) | 22.2 (8.9 to 36.9) | *** | *** |
| 180 | 3 | 19 | 9.1 (3.0 to 18.0) | 55.8 (37.7 to 75.0) | 46.7 (26.4 to 67.9) | 6.15 (2.91 to 23.12) | *** |
| 365 | 10 | 23 | 25.1 (14.2 to 37.9) | 92.5 (69.8 to 118.5) | 67.4 (40.3 to 94.5) | 3.68 (2.18 to 6.62) | 2.42 (1.22 to 6.31) |
| 730 | 17 | 31 | 55.2 (37.9 to 74.9) | 146.7 (119.3 to 180.5) | 91.5 (57.9 to 128.2) | 2.66 (1.85 to 4.11) | 1.94 (1.07 to 3.85) |
| 1095 | 19 | 18 | 93.4 (68.6 to 118.3) | 182.7 (150.6 to 219.2) | 89.3 (47.6 to 133.5) | 1.96 (1.41 to 2.82) | 1.02 (0.51 to 2.00) |
| 1460 | 15 | 20 | 128.3 (96.5 to 159.7) | 230.0 (191.3 to 274.4) | 101.7 (49.9 to 157.8) | 1.79 (1.33 to 2.52) | 1.44 (0.78 to 3.09) |
| 1825 | 13 | 19 | 164.2 (128.8 to 199.6) | 280.8 (233.6 to 331.1) | 116.6 (62.6 to 176.9) | 1.71 (1.34 to 2.29) | 1.59 (0.73 to 3.27) |
| 2190 | 8 | 14 | 189.9 (149.5 to 229.6) | 325.9 (274.9 to 383.3) | 136.0 (72.8 to 201.6) | 1.72 (1.34 to 2.25) | 1.92 (0.88 to 5.81) |
| 2555 | 8 | 15 | 221.0 (176.7 to 265.1) | 385.4 (325.4 to 453.5) | 164.3 (90.9 to 241.4) | 1.74 (1.35 to 2.29) | 2.07 (0.85 to 6.07) |
| 2920 | 9 | 5 | 265.0 (211.1 to 315.3) | 409.0 (345.2 to 474.2) | 144.0 (63.7 to 236.3) | 1.54 (1.21 to 2.05) | *** |
| 3285 | 3 | 7 | 282.8 (223.9 to 342.9) | 452.9 (387.4 to 526.7) | 170.1 (80.4 to 273.0) | 1.60 (1.25 to 2.16) | *** |
| 3650 | 2 | 4 | 300.7 (233.4 to 370.6) | 488.3 (410.0 to 571.8) | 187.6 (88.1 to 295.6) | 1.62 (1.24 to 2.21) | *** |
| 4015 | 4 | 2 | 349.2 (269.2 to 434.1) | 515.3 (432.1 to 602.8) | 166.0 (45.4 to 290.6) | 1.48 (1.11 to 1.98) | *** |
| 4380 | 0 | 2 | 349.2 (269.2 to 434.1) | 554.6 (450.7 to 663.8) | 205.3 (64.7 to 336.7) | 1.59 (1.15 to 2.14) | *** |
| 4745 | 0 | 1 | 349.2 (269.2 to 434.1) | 591.6 (478.3 to 728.6) | 242.3 (94.3 to 390.7) | 1.69 (1.23 to 2.37) | *** |
| 5110 | 0 | 0 | 349.2 (269.2 to 434.1) | 591.6 (478.3 to 728.6) | 242.3 (94.3 to 390.7) | 1.69 (1.23 to 2.37) | *** |

*** IRR/RR was not estimated when there were fewer than 20 events in the risk period or fewer than 5 events in one group.

# Supplementary Table 12. Estimated risk of death by cause-specific (defined by ICD-10 chapters) comparing diagnosed Tuberculosis cases compared to non-exposed controls in Males.

|  | **Number of events** | | **Risk per 100,000** | |  |  |  |
| --- | --- | --- | --- | --- | --- | --- | --- |
| **Time - Days** | **Unexposed** | **Exposed** | **Unexposed** | **Exposed** | **Risk difference per 100,000 - 95% CI** | **Risk ratio - 95% CI** | **Incidence rate ratio - 95% CI** |
| **Cause: All-cause** | | | | | | | |
| 30 | 70 | 3465 | 59.9 (47.5 to 74.0) | 2959.2 (2870.4 to 3053.1) | 2899.3 (2807.6 to 2994.0) | 49.38 (39.89 to 62.47) | 50.42 (40.70 to 63.80) |
| 90 | 131 | 1922 | 174.2 (151.1 to 199.7) | 4629.9 (4510.0 to 4744.0) | 4455.7 (4336.6 to 4573.3) | 26.58 (23.34 to 30.54) | 15.25 (12.89 to 18.75) |
| 180 | 161 | 1319 | 319.2 (288.4 to 351.3) | 5814.8 (5690.9 to 5944.2) | 5495.6 (5372.8 to 5625.8) | 18.22 (16.51 to 20.15) | 8.63 (7.46 to 10.25) |
| 365 | 360 | 1607 | 662.3 (618.2 to 710.6) | 7342.8 (7216.7 to 7486.6) | 6680.5 (6541.6 to 6838.6) | 11.09 (10.27 to 11.94) | 4.76 (4.26 to 5.37) |
| 730 | 597 | 2115 | 1299.6 (1231.4 to 1371.1) | 9592.7 (9429.2 to 9763.4) | 8293.1 (8115.6 to 8481.6) | 7.38 (6.96 to 7.83) | 3.83 (3.53 to 4.24) |
| 1095 | 545 | 1484 | 1977.6 (1885.5 to 2066.7) | 11437.7 (11252.0 to 11623.7) | 9460.1 (9257.3 to 9672.4) | 5.78 (5.52 to 6.07) | 2.99 (2.72 to 3.34) |
| 1460 | 517 | 1211 | 2734.8 (2627.9 to 2836.5) | 13202.3 (13003.9 to 13407.7) | 10467.6 (10248.0 to 10709.2) | 4.83 (4.63 to 5.04) | 2.60 (2.36 to 2.89) |
| 1825 | 416 | 1001 | 3450.3 (3326.0 to 3576.2) | 14919.8 (14688.7 to 15150.3) | 11469.5 (11217.2 to 11744.7) | 4.32 (4.16 to 4.50) | 2.70 (2.43 to 3.05) |
| 2190 | 321 | 809 | 4118.1 (3972.8 to 4265.8) | 16590.3 (16349.4 to 16834.1) | 12472.2 (12164.5 to 12769.5) | 4.03 (3.88 to 4.19) | 2.86 (2.52 to 3.29) |
| 2555 | 254 | 619 | 4768.7 (4594.4 to 4936.4) | 18161.5 (17888.3 to 18430.4) | 13392.8 (13089.1 to 13690.4) | 3.81 (3.67 to 3.96) | 2.80 (2.44 to 3.32) |
| 2920 | 200 | 431 | 5420.5 (5215.9 to 5607.8) | 19552.2 (19237.5 to 19835.4) | 14131.6 (13792.1 to 14496.5) | 3.61 (3.48 to 3.75) | 2.50 (2.11 to 3.00) |
| 3285 | 161 | 377 | 6116.4 (5896.7 to 6318.0) | 21153.4 (20805.5 to 21480.8) | 15037.1 (14622.9 to 15457.2) | 3.46 (3.34 to 3.60) | 2.75 (2.33 to 3.35) |
| 3650 | 125 | 207 | 6853.4 (6605.6 to 7101.4) | 22383.4 (22036.4 to 22743.2) | 15529.9 (15075.9 to 15955.8) | 3.27 (3.15 to 3.40) | 1.97 (1.58 to 2.47) |
| 4015 | 72 | 148 | 7507.5 (7211.2 to 7789.0) | 23761.6 (23333.0 to 24182.9) | 16254.0 (15749.5 to 16731.7) | 3.17 (3.04 to 3.30) | 2.47 (1.86 to 3.29) |
| 4380 | 39 | 82 | 8201.1 (7845.5 to 8556.5) | 25210.7 (24690.7 to 25760.2) | 17009.6 (16420.4 to 17585.0) | 3.07 (2.93 to 3.22) | 2.55 (1.76 to 3.76) |
| 4745 | 21 | 24 | 9270.8 (8663.6 to 9897.0) | 26392.1 (25661.6 to 27190.3) | 17121.4 (16172.6 to 18104.5) | 2.85 (2.65 to 3.07) | 1.41 (0.74 to 2.75) |
| 5110 | 5 | 1 | 10301.5 (9235.8 to 11505.5) | 26722.2 (25866.3 to 27730.2) | 16420.7 (14811.9 to 17975.8) | 2.59 (2.29 to 2.90) | *** |
| **Cause: Natural - excluding (HIV/TB and external causes)** | | | | | | | |
| 30 | 37 | 1026 | 31.7 (22.3 to 41.1) | 876.6 (827.0 to 929.0) | 844.9 (797.0 to 894.4) | 27.68 (21.21 to 39.12) | 28.24 (21.63 to 39.89) |
| 90 | 86 | 765 | 106.7 (88.4 to 127.6) | 1541.6 (1474.6 to 1619.5) | 1434.9 (1368.0 to 1505.2) | 14.45 (12.11 to 17.60) | 9.25 (7.43 to 12.08) |
| 180 | 121 | 578 | 215.8 (190.2 to 243.1) | 2060.9 (1990.2 to 2146.3) | 1845.1 (1766.4 to 1929.8) | 9.55 (8.51 to 10.96) | 5.03 (4.18 to 6.15) |
| 365 | 245 | 817 | 449.3 (410.0 to 490.8) | 2838.3 (2747.3 to 2941.2) | 2389.0 (2286.1 to 2495.9) | 6.32 (5.72 to 6.94) | 3.55 (3.10 to 4.13) |
| 730 | 417 | 1207 | 895.2 (842.2 to 955.3) | 4125.8 (4014.5 to 4245.0) | 3230.6 (3103.9 to 3363.2) | 4.61 (4.28 to 4.93) | 3.13 (2.84 to 3.54) |
| 1095 | 389 | 899 | 1379.4 (1304.9 to 1460.5) | 5244.0 (5109.1 to 5375.9) | 3864.6 (3720.5 to 4012.5) | 3.80 (3.56 to 4.04) | 2.54 (2.27 to 2.86) |
| 1460 | 380 | 747 | 1937.1 (1843.5 to 2027.3) | 6332.9 (6180.2 to 6478.9) | 4395.7 (4227.4 to 4583.7) | 3.27 (3.11 to 3.46) | 2.18 (1.94 to 2.49) |
| 1825 | 305 | 647 | 2463.5 (2348.0 to 2579.0) | 7444.7 (7276.0 to 7619.5) | 4981.1 (4781.3 to 5196.4) | 3.02 (2.88 to 3.18) | 2.38 (2.11 to 2.75) |
| 2190 | 253 | 545 | 2989.1 (2860.6 to 3104.4) | 8568.3 (8364.9 to 8756.5) | 5579.1 (5370.1 to 5807.5) | 2.87 (2.74 to 3.00) | 2.45 (2.14 to 2.83) |
| 2555 | 179 | 414 | 3447.0 (3303.6 to 3587.6) | 9619.8 (9402.8 to 9830.5) | 6172.8 (5928.8 to 6419.7) | 2.79 (2.67 to 2.92) | 2.66 (2.26 to 3.17) |
| 2920 | 142 | 290 | 3908.8 (3746.6 to 4075.2) | 10554.2 (10309.4 to 10789.9) | 6645.4 (6391.6 to 6948.8) | 2.70 (2.58 to 2.83) | 2.37 (1.95 to 2.93) |
| 3285 | 124 | 266 | 4441.6 (4244.3 to 4635.8) | 11688.8 (11417.4 to 11942.2) | 7247.2 (6946.8 to 7562.5) | 2.63 (2.52 to 2.77) | 2.52 (2.04 to 3.15) |
| 3650 | 92 | 156 | 4982.4 (4757.2 to 5217.3) | 12625.1 (12324.6 to 12937.5) | 7642.7 (7297.8 to 7995.9) | 2.53 (2.41 to 2.66) | 2.01 (1.56 to 2.59) |
| 4015 | 57 | 117 | 5489.1 (5229.9 to 5745.5) | 13714.3 (13351.2 to 14075.5) | 8225.2 (7802.2 to 8672.6) | 2.50 (2.38 to 2.63) | 2.46 (1.83 to 3.38) |
| 4380 | 32 | 66 | 6072.1 (5755.0 to 6397.7) | 14869.4 (14409.0 to 15325.0) | 8797.3 (8292.1 to 9290.4) | 2.45 (2.31 to 2.59) | 2.50 (1.74 to 4.06) |
| 4745 | 16 | 17 | 6924.8 (6389.3 to 7455.6) | 15662.3 (15045.5 to 16296.5) | 8737.5 (7928.7 to 9550.7) | 2.26 (2.09 to 2.47) | 1.31 (0.62 to 2.99) |
| 5110 | 5 | 0 | 7955.6 (6895.1 to 9105.7) | 15662.3 (15045.5 to 16296.5) | 7706.7 (6254.4 to 8989.2) | 1.97 (1.69 to 2.28) | *** |
| **Cause: Cancer** | | | | | | | |
| 30 | 6 | 164 | 5.1 (1.7 to 9.4) | 140.2 (117.5 to 160.7) | 135.1 (112.9 to 155.6) | 27.27 (14.30 to 92.35) | 27.84 (14.60 to 94.26) |
| 90 | 15 | 199 | 18.2 (10.4 to 26.1) | 313.3 (278.7 to 347.3) | 295.0 (261.3 to 329.3) | 17.17 (11.77 to 29.52) | 13.79 (8.59 to 26.41) |
| 180 | 15 | 164 | 31.8 (22.5 to 43.4) | 460.6 (421.6 to 501.0) | 428.7 (389.3 to 469.6) | 14.47 (10.59 to 21.15) | 11.51 (7.44 to 21.06) |
| 365 | 41 | 240 | 71.2 (55.9 to 89.2) | 688.8 (641.8 to 736.5) | 617.7 (566.5 to 667.3) | 9.68 (7.55 to 12.29) | 6.24 (4.36 to 8.80) |
| 730 | 77 | 273 | 153.1 (128.0 to 179.4) | 979.5 (918.1 to 1039.2) | 826.4 (757.2 to 891.9) | 6.40 (5.40 to 7.62) | 3.84 (3.07 to 5.07) |
| 1095 | 51 | 168 | 217.0 (187.6 to 248.5) | 1188.8 (1119.2 to 1253.8) | 971.7 (891.8 to 1047.0) | 5.48 (4.72 to 6.40) | 3.62 (2.64 to 5.08) |
| 1460 | 72 | 113 | 322.9 (287.2 to 361.6) | 1353.6 (1273.4 to 1425.1) | 1030.8 (940.3 to 1116.7) | 4.19 (3.68 to 4.79) | 1.74 (1.32 to 2.44) |
| 1825 | 51 | 120 | 410.7 (366.7 to 454.3) | 1559.8 (1470.7 to 1641.7) | 1149.1 (1043.2 to 1248.9) | 3.80 (3.38 to 4.29) | 2.64 (1.91 to 3.77) |
| 2190 | 44 | 94 | 502.7 (454.5 to 556.5) | 1752.6 (1651.5 to 1837.6) | 1249.9 (1143.2 to 1352.8) | 3.49 (3.14 to 3.92) | 2.43 (1.73 to 3.45) |
| 2555 | 33 | 67 | 585.7 (522.5 to 645.2) | 1920.7 (1816.8 to 2011.6) | 1335.0 (1225.1 to 1449.3) | 3.28 (2.94 to 3.69) | 2.34 (1.58 to 3.62) |
| 2920 | 25 | 49 | 668.4 (604.2 to 743.6) | 2078.6 (1956.7 to 2176.5) | 1410.2 (1288.0 to 1529.0) | 3.11 (2.76 to 3.48) | 2.28 (1.41 to 3.93) |
| 3285 | 26 | 47 | 778.9 (705.7 to 864.1) | 2280.2 (2146.0 to 2392.8) | 1501.3 (1338.3 to 1633.8) | 2.93 (2.60 to 3.28) | 2.12 (1.24 to 3.36) |
| 3650 | 18 | 34 | 884.1 (798.0 to 976.5) | 2486.1 (2328.5 to 2611.3) | 1602.0 (1419.2 to 1759.7) | 2.81 (2.51 to 3.16) | 2.24 (1.36 to 4.23) |
| 4015 | 12 | 20 | 994.5 (882.7 to 1112.6) | 2672.5 (2501.0 to 2823.7) | 1678.0 (1468.1 to 1871.3) | 2.69 (2.37 to 3.02) | 2.00 (1.00 to 4.80) |
| 4380 | 6 | 17 | 1099.3 (977.9 to 1249.4) | 2977.1 (2765.1 to 3182.8) | 1877.8 (1623.7 to 2127.1) | 2.71 (2.35 to 3.11) | 3.44 (1.49 to 10.08) |
| 4745 | 5 | 3 | 1352.4 (1110.1 to 1698.4) | 3101.8 (2858.0 to 3352.3) | 1749.4 (1328.1 to 2136.0) | 2.29 (1.79 to 2.87) | *** |
| 5110 | 1 | 0 | 1469.0 (1149.6 to 1896.6) | 3101.8 (2858.0 to 3352.3) | 1632.8 (1118.3 to 2054.1) | 2.11 (1.60 to 2.72) | *** |
| **Cause: Cardiovascular** | | | | | | | |
| 30 | 9 | 125 | 7.7 (3.4 to 12.8) | 106.8 (89.7 to 126.9) | 99.1 (80.7 to 119.6) | 13.89 (8.08 to 29.67) | 14.15 (8.22 to 30.20) |
| 90 | 28 | 106 | 32.1 (21.7 to 42.6) | 199.0 (174.3 to 226.2) | 166.9 (139.9 to 195.4) | 6.20 (4.52 to 9.09) | 3.94 (2.66 to 6.39) |
| 180 | 36 | 107 | 64.6 (50.5 to 80.9) | 295.2 (266.3 to 329.4) | 230.6 (195.9 to 266.5) | 4.57 (3.62 to 5.97) | 3.13 (2.20 to 4.59) |
| 365 | 93 | 147 | 153.0 (132.5 to 176.5) | 434.7 (398.1 to 476.0) | 281.7 (236.2 to 327.2) | 2.84 (2.40 to 3.36) | 1.68 (1.30 to 2.15) |
| 730 | 129 | 225 | 291.1 (257.3 to 324.0) | 674.4 (628.8 to 725.1) | 383.3 (330.2 to 447.5) | 2.32 (2.04 to 2.66) | 1.89 (1.56 to 2.37) |
| 1095 | 151 | 191 | 478.7 (435.0 to 519.6) | 912.2 (849.7 to 975.8) | 433.5 (355.3 to 507.3) | 1.91 (1.70 to 2.14) | 1.39 (1.11 to 1.70) |
| 1460 | 124 | 182 | 659.7 (607.4 to 714.2) | 1177.9 (1108.7 to 1256.3) | 518.2 (429.0 to 610.8) | 1.79 (1.61 to 1.99) | 1.63 (1.29 to 2.14) |
| 1825 | 102 | 134 | 835.4 (767.5 to 904.5) | 1409.7 (1330.8 to 1499.1) | 574.2 (464.9 to 692.4) | 1.69 (1.52 to 1.87) | 1.48 (1.13 to 1.93) |
| 2190 | 89 | 113 | 1019.7 (944.6 to 1094.5) | 1643.7 (1549.2 to 1739.4) | 623.9 (505.3 to 748.5) | 1.61 (1.47 to 1.79) | 1.44 (1.08 to 1.93) |
| 2555 | 65 | 86 | 1186.8 (1101.1 to 1272.7) | 1865.3 (1757.6 to 1970.2) | 678.5 (538.2 to 823.2) | 1.57 (1.44 to 1.74) | 1.52 (1.12 to 2.13) |
| 2920 | 56 | 70 | 1366.8 (1268.7 to 1470.1) | 2090.4 (1964.4 to 2212.7) | 723.6 (554.6 to 876.4) | 1.53 (1.39 to 1.68) | 1.45 (0.98 to 2.05) |
| 3285 | 41 | 54 | 1546.2 (1429.1 to 1669.1) | 2324.7 (2181.9 to 2457.3) | 778.6 (599.7 to 950.2) | 1.50 (1.37 to 1.65) | 1.55 (1.03 to 2.31) |
| 3650 | 40 | 35 | 1780.8 (1647.7 to 1926.7) | 2534.4 (2383.1 to 2678.8) | 753.5 (530.7 to 932.7) | 1.42 (1.29 to 1.55) | 1.04 (0.66 to 1.58) |
| 4015 | 19 | 19 | 1941.7 (1789.5 to 2102.6) | 2707.3 (2548.3 to 2856.3) | 765.6 (539.7 to 975.8) | 1.39 (1.26 to 1.53) | 1.20 (0.66 to 2.29) |
| 4380 | 15 | 17 | 2195.7 (1990.0 to 2394.3) | 2995.2 (2784.4 to 3204.6) | 799.5 (511.9 to 1068.0) | 1.36 (1.22 to 1.52) | 1.38 (0.72 to 2.73) |
| 4745 | 6 | 3 | 2572.5 (2228.7 to 2970.2) | 3105.7 (2865.0 to 3363.8) | 533.2 (2.9 to 914.8) | 1.21 (1.00 to 1.40) | *** |
| 5110 | 0 | 0 | 2572.5 (2228.7 to 2970.2) | 3105.7 (2865.0 to 3363.8) | 533.2 (2.9 to 914.8) | 1.21 (1.00 to 1.40) | *** |
| **Cause: Endocrine** | | | | | | | |
| 30 | 2 | 64 | 1.7 (0.0 to 4.3) | 54.7 (41.0 to 68.3) | 53.0 (39.3 to 66.7) | *** | *** |
| 90 | 8 | 42 | 8.7 (3.5 to 14.8) | 91.3 (74.0 to 107.6) | 82.6 (64.3 to 99.7) | 10.48 (5.89 to 24.42) | 5.46 (2.81 to 15.59) |
| 180 | 9 | 35 | 16.8 (9.7 to 24.8) | 122.7 (102.5 to 142.6) | 105.9 (84.0 to 126.2) | 7.30 (4.75 to 13.06) | 4.10 (2.11 to 11.24) |
| 365 | 21 | 42 | 36.8 (26.2 to 48.2) | 162.8 (138.6 to 186.7) | 126.0 (97.7 to 151.6) | 4.42 (3.19 to 6.39) | 2.13 (1.26 to 3.93) |
| 730 | 37 | 62 | 76.2 (59.7 to 94.2) | 229.7 (200.1 to 258.4) | 153.5 (117.6 to 186.0) | 3.01 (2.33 to 3.93) | 1.81 (1.22 to 2.82) |
| 1095 | 26 | 59 | 108.6 (88.2 to 129.2) | 302.5 (266.1 to 335.2) | 193.9 (153.2 to 231.6) | 2.79 (2.23 to 3.51) | 2.49 (1.63 to 4.15) |
| 1460 | 27 | 55 | 148.7 (123.6 to 175.0) | 382.6 (343.4 to 424.3) | 233.9 (187.7 to 281.5) | 2.57 (2.11 to 3.21) | 2.26 (1.43 to 3.75) |
| 1825 | 17 | 40 | 178.1 (149.1 to 206.6) | 451.0 (410.7 to 495.6) | 272.9 (219.9 to 329.2) | 2.53 (2.12 to 3.11) | 2.64 (1.60 to 5.01) |
| 2190 | 16 | 43 | 211.1 (178.8 to 241.8) | 539.8 (487.3 to 593.8) | 328.7 (269.2 to 394.4) | 2.56 (2.15 to 3.10) | 3.05 (1.81 to 6.02) |
| 2555 | 12 | 31 | 242.1 (205.0 to 276.3) | 617.5 (562.8 to 678.8) | 375.4 (306.8 to 449.9) | 2.55 (2.15 to 3.13) | 2.97 (1.58 to 6.57) |
| 2920 | 4 | 18 | 254.8 (215.7 to 292.7) | 674.2 (611.9 to 744.1) | 419.4 (348.1 to 501.0) | 2.65 (2.23 to 3.19) | 5.23 (2.15 to 26.80) |
| 3285 | 7 | 17 | 285.7 (243.0 to 334.4) | 747.4 (679.6 to 819.8) | 461.7 (380.4 to 550.4) | 2.62 (2.17 to 3.17) | 2.85 (1.29 to 8.76) |
| 3650 | 5 | 12 | 315.9 (265.4 to 367.0) | 820.2 (743.4 to 902.9) | 504.3 (406.3 to 605.1) | 2.60 (2.16 to 3.19) | *** |
| 4015 | 2 | 5 | 334.1 (278.2 to 390.4) | 869.7 (781.7 to 968.0) | 535.5 (436.2 to 652.2) | 2.60 (2.14 to 3.23) | *** |
| 4380 | 4 | 2 | 417.1 (321.6 to 527.4) | 903.4 (805.0 to 1011.8) | 486.3 (342.8 to 631.4) | 2.17 (1.69 to 2.88) | *** |
| 4745 | 1 | 1 | 451.3 (345.3 to 583.1) | 946.6 (814.4 to 1097.2) | 495.4 (326.6 to 681.6) | 2.10 (1.60 to 2.88) | *** |
| 5110 | 0 | 0 | 451.3 (345.3 to 583.1) | 946.6 (814.4 to 1097.2) | 495.4 (326.6 to 681.6) | 2.10 (1.60 to 2.88) | *** |
| **Cause: Respiratory** | | | | | | | |
| 30 | 6 | 309 | 5.1 (1.7 to 9.0) | 263.8 (234.3 to 291.6) | 258.7 (228.8 to 288.6) | 51.36 (29.30 to 163.19) | 52.45 (29.94 to 166.84) |
| 90 | 8 | 133 | 12.1 (6.0 to 19.0) | 379.4 (342.4 to 414.8) | 367.3 (330.4 to 402.9) | 31.42 (20.34 to 65.47) | 17.28 (10.14 to 49.76) |
| 180 | 16 | 98 | 26.5 (16.9 to 36.2) | 467.4 (428.2 to 507.1) | 440.9 (401.1 to 483.6) | 17.61 (13.06 to 28.42) | 6.45 (4.21 to 12.33) |
| 365 | 20 | 158 | 45.7 (32.6 to 58.2) | 617.8 (574.5 to 664.8) | 572.1 (526.9 to 621.7) | 13.52 (10.50 to 19.38) | 8.42 (5.52 to 15.12) |
| 730 | 50 | 250 | 99.3 (79.8 to 118.1) | 884.7 (823.8 to 937.0) | 785.4 (721.6 to 842.7) | 8.91 (7.35 to 11.13) | 5.41 (4.08 to 7.63) |
| 1095 | 51 | 168 | 162.5 (136.8 to 189.4) | 1093.3 (1027.9 to 1154.0) | 930.8 (862.0 to 995.1) | 6.73 (5.65 to 8.02) | 3.62 (2.72 to 5.07) |
| 1460 | 40 | 157 | 221.6 (190.0 to 252.2) | 1321.5 (1251.0 to 1387.1) | 1100.0 (1021.8 to 1167.9) | 5.96 (5.18 to 7.00) | 4.36 (3.12 to 6.08) |
| 1825 | 36 | 135 | 283.7 (245.8 to 318.2) | 1552.1 (1473.7 to 1625.5) | 1268.4 (1179.5 to 1353.3) | 5.47 (4.79 to 6.36) | 4.21 (3.02 to 6.44) |
| 2190 | 29 | 96 | 344.6 (301.9 to 384.2) | 1749.8 (1658.6 to 1838.3) | 1405.3 (1304.4 to 1510.8) | 5.08 (4.50 to 5.88) | 3.76 (2.49 to 5.79) |
| 2555 | 18 | 78 | 390.3 (337.3 to 439.4) | 1946.9 (1851.6 to 2047.2) | 1556.6 (1455.7 to 1670.2) | 4.99 (4.42 to 5.79) | 4.99 (3.26 to 9.12) |
| 2920 | 17 | 59 | 446.2 (388.4 to 498.1) | 2138.4 (2032.4 to 2253.2) | 1692.3 (1574.3 to 1813.5) | 4.79 (4.21 to 5.53) | 4.03 (2.33 to 7.42) |
| 3285 | 9 | 49 | 484.8 (424.0 to 543.5) | 2344.6 (2227.3 to 2459.9) | 1859.8 (1723.9 to 1994.5) | 4.84 (4.26 to 5.58) | 6.40 (3.57 to 18.50) |
| 3650 | 10 | 26 | 544.5 (475.5 to 616.7) | 2498.2 (2370.8 to 2625.8) | 1953.7 (1814.0 to 2095.8) | 4.59 (4.06 to 5.28) | 3.09 (1.43 to 7.40) |
| 4015 | 5 | 35 | 593.9 (515.6 to 679.0) | 2819.7 (2646.2 to 3008.0) | 2225.8 (2044.1 to 2420.6) | 4.75 (4.12 to 5.58) | 8.40 (3.73 to 42.68) |
| 4380 | 1 | 13 | 610.1 (523.4 to 705.3) | 3029.5 (2822.1 to 3270.8) | 2419.4 (2205.1 to 2659.0) | 4.97 (4.24 to 5.88) | *** |
| 4745 | 1 | 4 | 681.7 (550.5 to 859.0) | 3253.2 (2945.6 to 3556.8) | 2571.5 (2206.2 to 2934.6) | 4.77 (3.71 to 6.14) | *** |
| 5110 | 1 | 0 | 838.8 (574.9 to 1266.2) | 3253.2 (2945.6 to 3556.8) | 2414.4 (1952.7 to 2848.4) | 3.88 (2.57 to 5.68) | *** |
| **Cause: External** | | | | | | | |
| 30 | 31 | 52 | 26.5 (17.5 to 36.4) | 44.4 (33.3 to 56.9) | 17.9 (3.3 to 32.0) | 1.67 (1.10 to 2.63) | 1.71 (1.12 to 2.68) |
| 90 | 42 | 61 | 63.2 (49.4 to 77.8) | 97.5 (80.7 to 115.7) | 34.4 (13.5 to 56.0) | 1.54 (1.18 to 2.03) | 1.51 (1.04 to 2.28) |
| 180 | 40 | 132 | 99.1 (81.5 to 117.2) | 216.3 (192.3 to 245.9) | 117.2 (87.2 to 150.5) | 2.18 (1.76 to 2.73) | 3.48 (2.45 to 5.21) |
| 365 | 107 | 263 | 201.1 (176.5 to 228.4) | 467.3 (427.5 to 508.9) | 266.2 (216.1 to 311.6) | 2.32 (1.98 to 2.70) | 2.62 (2.13 to 3.31) |
| 730 | 174 | 450 | 386.1 (350.1 to 420.7) | 947.8 (890.7 to 1008.9) | 561.7 (491.7 to 631.1) | 2.45 (2.20 to 2.75) | 2.80 (2.36 to 3.35) |
| 1095 | 150 | 331 | 572.6 (526.1 to 618.5) | 1358.5 (1282.6 to 1437.7) | 785.9 (698.6 to 875.7) | 2.37 (2.14 to 2.61) | 2.42 (2.02 to 2.99) |
| 1460 | 127 | 246 | 757.1 (702.6 to 809.1) | 1717.4 (1630.8 to 1803.9) | 960.3 (854.9 to 1064.3) | 2.27 (2.08 to 2.48) | 2.15 (1.73 to 2.69) |
| 1825 | 102 | 207 | 931.2 (866.0 to 994.1) | 2073.0 (1979.7 to 2181.0) | 1141.8 (1022.7 to 1266.7) | 2.23 (2.05 to 2.43) | 2.28 (1.80 to 2.92) |
| 2190 | 64 | 163 | 1064.4 (992.0 to 1139.5) | 2410.1 (2299.7 to 2531.3) | 1345.7 (1215.8 to 1482.4) | 2.26 (2.08 to 2.46) | 2.89 (2.21 to 3.96) |
| 2555 | 69 | 115 | 1241.7 (1159.4 to 1332.5) | 2704.1 (2587.2 to 2832.8) | 1462.4 (1315.5 to 1610.4) | 2.18 (2.01 to 2.37) | 1.92 (1.43 to 2.64) |
| 2920 | 53 | 92 | 1415.1 (1330.7 to 1511.1) | 3000.9 (2869.8 to 3149.5) | 1585.8 (1427.7 to 1748.9) | 2.12 (1.95 to 2.28) | 2.02 (1.43 to 2.87) |
| 3285 | 35 | 67 | 1568.5 (1462.1 to 1686.4) | 3282.7 (3146.8 to 3451.3) | 1714.2 (1530.4 to 1908.7) | 2.09 (1.93 to 2.28) | 2.25 (1.52 to 3.61) |
| 3650 | 28 | 33 | 1735.1 (1620.8 to 1864.1) | 3472.0 (3323.4 to 3647.7) | 1736.9 (1541.0 to 1930.0) | 2.00 (1.84 to 2.17) | 1.40 (0.85 to 2.32) |
| 4015 | 12 | 23 | 1851.9 (1708.9 to 2006.8) | 3685.8 (3516.9 to 3898.7) | 1833.9 (1595.5 to 2063.6) | 1.99 (1.82 to 2.19) | 2.30 (1.20 to 5.31) |
| 4380 | 6 | 11 | 1946.3 (1793.0 to 2104.6) | 3892.2 (3682.2 to 4137.7) | 1945.9 (1671.5 to 2239.3) | 2.00 (1.80 to 2.22) | *** |
| 4745 | 5 | 5 | 2163.3 (1924.0 to 2423.7) | 4218.9 (3892.7 to 4679.8) | 2055.6 (1623.0 to 2517.9) | 1.95 (1.68 to 2.24) | *** |
| 5110 | 0 | 1 | 2163.3 (1924.0 to 2423.7) | 4549.0 (3961.0 to 5379.4) | 2385.7 (1757.6 to 3198.4) | 2.10 (1.76 to 2.58) | *** |

# Supplementary Table 13. Estimated risk of death by cause-specific (defined by ICD-10 chapters) comparing treated Tuberculosis cases compared to non-exposed controls in Females.

|  | **Number of events** | | **Risk per 100,000** | |  |  |  |
| --- | --- | --- | --- | --- | --- | --- | --- |
| **Time - Days** | **Unexposed** | **Exposed** | **Unexposed** | **Exposed** | **Risk difference per 100,000 - 95% CI** | **Risk ratio - 95% CI** | **Incidence rate ratio - 95% CI** |
| **Cause: All-cause** | | | | | | | |
| 30 | 14 | 49 | 32.9 (16.5 to 51.7) | 115.0 (84.4 to 145.4) | 82.1 (48.0 to 112.7) | 3.50 (2.05 to 7.00) | 3.50 (2.05 to 7.00) |
| 90 | 18 | 95 | 75.7 (52.0 to 104.2) | 341.8 (284.7 to 392.5) | 266.0 (207.0 to 323.1) | 4.51 (3.18 to 6.68) | 5.29 (3.35 to 9.73) |
| 180 | 41 | 127 | 176.5 (139.7 to 217.8) | 653.7 (582.1 to 729.4) | 477.2 (397.7 to 556.1) | 3.70 (2.95 to 4.82) | 3.11 (2.31 to 4.56) |
| 365 | 56 | 219 | 321.4 (262.9 to 375.9) | 1218.5 (1118.9 to 1322.6) | 897.1 (795.5 to 1017.3) | 3.79 (3.25 to 4.70) | 3.94 (3.08 to 5.49) |
| 730 | 128 | 340 | 690.2 (607.3 to 772.5) | 2194.2 (2044.4 to 2344.5) | 1504.0 (1353.1 to 1667.4) | 3.18 (2.83 to 3.61) | 2.69 (2.21 to 3.26) |
| 1095 | 91 | 274 | 996.0 (896.0 to 1100.8) | 3110.7 (2924.1 to 3290.5) | 2114.8 (1916.6 to 2294.4) | 3.12 (2.78 to 3.48) | 3.07 (2.43 to 3.89) |
| 1460 | 86 | 247 | 1340.0 (1221.8 to 1473.1) | 4096.0 (3883.8 to 4330.3) | 2756.0 (2525.5 to 3015.0) | 3.06 (2.76 to 3.38) | 2.94 (2.37 to 3.77) |
| 1825 | 75 | 154 | 1700.9 (1551.7 to 1849.5) | 4837.9 (4595.1 to 5097.1) | 3137.0 (2871.9 to 3399.7) | 2.84 (2.60 to 3.11) | 2.11 (1.64 to 2.84) |
| 2190 | 73 | 153 | 2122.8 (1953.5 to 2309.1) | 5718.7 (5440.2 to 5983.4) | 3596.0 (3279.5 to 3900.0) | 2.69 (2.45 to 2.95) | 2.17 (1.65 to 2.89) |
| 2555 | 54 | 119 | 2500.0 (2314.8 to 2730.4) | 6565.6 (6247.2 to 6869.4) | 4065.6 (3689.6 to 4414.8) | 2.63 (2.39 to 2.86) | 2.29 (1.68 to 3.15) |
| 2920 | 58 | 81 | 3025.0 (2789.4 to 3306.3) | 7300.6 (6933.4 to 7626.2) | 4275.6 (3879.6 to 4670.2) | 2.41 (2.20 to 2.64) | 1.46 (1.08 to 2.04) |
| 3285 | 30 | 76 | 3382.9 (3115.1 to 3689.3) | 8191.1 (7777.0 to 8582.2) | 4808.3 (4344.3 to 5227.2) | 2.42 (2.21 to 2.64) | 2.66 (1.77 to 4.31) |
| 3650 | 24 | 46 | 3785.1 (3473.9 to 4117.9) | 8984.1 (8508.1 to 9428.5) | 5199.0 (4690.0 to 5718.5) | 2.37 (2.17 to 2.58) | 2.02 (1.26 to 3.40) |
| 4015 | 17 | 25 | 4270.9 (3862.6 to 4664.9) | 9704.9 (9155.1 to 10250.1) | 5434.1 (4783.3 to 6055.6) | 2.27 (2.05 to 2.52) | 1.56 (0.89 to 3.17) |
| 4380 | 10 | 14 | 4714.4 (4247.6 to 5210.4) | 10390.9 (9711.0 to 10989.4) | 5676.6 (4892.2 to 6412.2) | 2.20 (1.97 to 2.45) | 1.49 (0.68 to 3.52) |
| 4745 | 5 | 5 | 5471.5 (4675.2 to 6371.2) | 11116.3 (10213.0 to 12155.6) | 5644.8 (4417.7 to 6836.4) | 2.03 (1.71 to 2.41) | *** |
| 5110 | 0 | 0 | 5471.5 (4675.2 to 6371.2) | 11116.3 (10213.0 to 12155.6) | 5644.8 (4417.7 to 6836.4) | 2.03 (1.71 to 2.41) | *** |
| **Cause: Natural - excluding (HIV/TB and external causes)** | | | | | | | |
| 30 | 13 | 34 | 30.5 (16.4 to 49.3) | 79.8 (54.0 to 104.5) | 49.3 (19.9 to 79.7) | 2.62 (1.49 to 5.38) | 2.62 (1.49 to 5.39) |
| 90 | 16 | 61 | 68.6 (47.2 to 96.0) | 225.5 (182.8 to 268.2) | 156.8 (107.1 to 207.8) | 3.28 (2.19 to 4.97) | 3.82 (2.32 to 6.97) |
| 180 | 37 | 87 | 159.6 (124.0 to 196.5) | 439.2 (383.2 to 497.0) | 279.6 (208.1 to 345.7) | 2.75 (2.12 to 3.64) | 2.36 (1.70 to 3.66) |
| 365 | 47 | 150 | 281.3 (228.9 to 330.7) | 826.4 (747.1 to 911.7) | 545.1 (461.6 to 648.1) | 2.94 (2.46 to 3.66) | 3.21 (2.47 to 4.61) |
| 730 | 112 | 232 | 604.0 (521.8 to 681.9) | 1494.2 (1375.0 to 1610.6) | 890.3 (754.9 to 1025.4) | 2.47 (2.16 to 2.87) | 2.10 (1.67 to 2.62) |
| 1095 | 82 | 212 | 879.5 (791.1 to 980.2) | 2202.6 (2052.0 to 2357.9) | 1323.1 (1142.3 to 1481.8) | 2.50 (2.20 to 2.83) | 2.63 (2.05 to 3.44) |
| 1460 | 82 | 181 | 1207.4 (1089.7 to 1328.6) | 2924.8 (2743.0 to 3130.1) | 1717.5 (1507.3 to 1948.8) | 2.42 (2.17 to 2.71) | 2.26 (1.78 to 2.98) |
| 1825 | 64 | 129 | 1515.3 (1381.1 to 1656.4) | 3544.9 (3318.6 to 3773.0) | 2029.5 (1777.3 to 2269.1) | 2.34 (2.09 to 2.58) | 2.08 (1.54 to 2.81) |
| 2190 | 65 | 120 | 1891.9 (1739.8 to 2070.6) | 4237.2 (3977.3 to 4489.7) | 2345.3 (2065.5 to 2585.1) | 2.24 (2.01 to 2.47) | 1.91 (1.42 to 2.58) |
| 2555 | 51 | 99 | 2249.3 (2064.9 to 2472.4) | 4939.9 (4658.1 to 5214.2) | 2690.6 (2362.8 to 2972.0) | 2.20 (1.98 to 2.40) | 2.02 (1.47 to 2.75) |
| 2920 | 52 | 67 | 2720.2 (2486.7 to 2979.4) | 5546.9 (5224.4 to 5807.1) | 2826.7 (2450.0 to 3184.0) | 2.04 (1.84 to 2.23) | 1.35 (0.95 to 1.94) |
| 3285 | 28 | 62 | 3053.0 (2792.8 to 3337.6) | 6271.4 (5881.2 to 6592.6) | 3218.3 (2790.6 to 3593.9) | 2.05 (1.86 to 2.25) | 2.32 (1.55 to 3.84) |
| 3650 | 20 | 37 | 3388.6 (3115.6 to 3691.9) | 6916.1 (6494.7 to 7297.3) | 3527.5 (3010.4 to 3965.8) | 2.04 (1.84 to 2.24) | 1.95 (1.18 to 3.56) |
| 4015 | 16 | 21 | 3843.8 (3454.8 to 4210.6) | 7510.8 (7041.7 to 8000.3) | 3667.0 (3047.6 to 4247.6) | 1.95 (1.76 to 2.19) | 1.39 (0.80 to 2.89) |
| 4380 | 9 | 13 | 4248.4 (3774.5 to 4754.9) | 8127.0 (7581.4 to 8693.2) | 3878.6 (3171.2 to 4591.1) | 1.91 (1.69 to 2.17) | 1.54 (0.66 to 3.88) |
| 4745 | 5 | 4 | 5005.6 (4248.5 to 5894.9) | 8728.7 (7959.0 to 9682.7) | 3723.1 (2527.6 to 4756.7) | 1.74 (1.44 to 2.09) | *** |
| 5110 | 0 | 0 | 5005.6 (4248.5 to 5894.9) | 8728.7 (7959.0 to 9682.7) | 3723.1 (2527.6 to 4756.7) | 1.74 (1.44 to 2.09) | *** |
| **Cause: Cancer** | | | | | | | |
| 30 | 2 | 10 | 4.7 (0.0 to 13.0) | 23.5 (9.4 to 37.6) | 18.8 (2.3 to 35.2) | *** | *** |
| 90 | 3 | 15 | 11.9 (2.4 to 23.7) | 59.4 (40.2 to 83.4) | 47.5 (26.1 to 72.3) | 5.01 (2.38 to 24.58) | *** |
| 180 | 3 | 19 | 19.1 (7.2 to 33.6) | 105.9 (77.0 to 137.2) | 86.7 (54.1 to 121.8) | 5.53 (2.93 to 14.12) | *** |
| 365 | 11 | 32 | 47.5 (28.1 to 70.4) | 188.7 (152.8 to 232.6) | 141.2 (95.3 to 187.6) | 3.97 (2.40 to 6.96) | 2.93 (1.55 to 6.25) |
| 730 | 29 | 38 | 131.6 (97.6 to 166.0) | 298.0 (245.4 to 349.8) | 166.4 (102.3 to 224.9) | 2.27 (1.66 to 3.07) | 1.33 (0.80 to 2.03) |
| 1095 | 20 | 46 | 199.2 (150.1 to 246.0) | 451.3 (382.6 to 520.3) | 252.1 (166.0 to 338.1) | 2.27 (1.73 to 3.00) | 2.34 (1.47 to 4.44) |
| 1460 | 21 | 37 | 283.8 (226.5 to 341.4) | 601.1 (517.8 to 686.7) | 317.3 (214.3 to 419.3) | 2.12 (1.66 to 2.72) | 1.81 (1.06 to 3.23) |
| 1825 | 11 | 20 | 334.6 (272.7 to 401.5) | 694.8 (603.3 to 797.8) | 360.3 (242.4 to 475.5) | 2.08 (1.65 to 2.65) | 1.87 (0.92 to 3.90) |
| 2190 | 8 | 21 | 379.7 (316.0 to 452.0) | 815.0 (710.1 to 928.7) | 435.3 (301.3 to 579.0) | 2.15 (1.70 to 2.73) | 2.72 (1.30 to 7.26) |
| 2555 | 10 | 19 | 451.3 (372.4 to 537.1) | 952.5 (829.2 to 1089.9) | 501.2 (356.8 to 656.6) | 2.11 (1.67 to 2.67) | 1.98 (0.91 to 4.59) |
| 2920 | 12 | 10 | 560.3 (460.4 to 673.6) | 1046.2 (915.7 to 1193.4) | 486.0 (309.1 to 662.7) | 1.87 (1.49 to 2.37) | 0.87 (0.36 to 2.33) |
| 3285 | 6 | 10 | 629.0 (514.6 to 763.7) | 1163.8 (1017.8 to 1326.2) | 534.9 (308.9 to 724.5) | 1.85 (1.42 to 2.29) | *** |
| 3650 | 8 | 4 | 761.5 (617.7 to 925.6) | 1232.0 (1083.7 to 1409.8) | 470.5 (234.7 to 700.3) | 1.62 (1.27 to 2.08) | *** |
| 4015 | 7 | 5 | 958.8 (745.8 to 1163.9) | 1391.0 (1168.2 to 1623.1) | 432.1 (132.0 to 745.4) | 1.45 (1.12 to 1.97) | *** |
| 4380 | 1 | 1 | 997.7 (776.0 to 1244.3) | 1450.3 (1220.8 to 1693.2) | 452.6 (119.6 to 787.0) | 1.45 (1.10 to 1.97) | *** |
| 4745 | 1 | 1 | 1162.0 (821.9 to 1596.3) | 1565.3 (1260.4 to 1881.5) | 403.4 (-161.7 to 891.8) | 1.35 (0.89 to 1.99) | *** |
| 5110 | 0 | 0 | 1162.0 (821.9 to 1596.3) | 1565.3 (1260.4 to 1881.5) | 403.4 (-161.7 to 891.8) | 1.35 (0.89 to 1.99) | *** |
| **Cause: Cardiovascular** | | | | | | | |
| 30 | 4 | 3 | 9.4 (2.3 to 18.8) | 7.0 (0.0 to 14.1) | -2.3 (-14.1 to 9.4) | *** | *** |
| 90 | 5 | 12 | 21.3 (8.2 to 35.6) | 35.7 (19.0 to 54.8) | 14.4 (-8.3 to 35.8) | 1.68 (0.76 to 4.87) | *** |
| 180 | 17 | 14 | 63.0 (41.1 to 87.3) | 70.1 (46.3 to 96.6) | 7.0 (-25.9 to 40.4) | 1.11 (0.65 to 1.93) | 0.83 (0.38 to 1.69) |
| 365 | 11 | 30 | 91.3 (64.0 to 120.5) | 147.5 (111.2 to 182.1) | 56.2 (10.4 to 102.4) | 1.62 (1.11 to 2.41) | 2.75 (1.48 to 6.50) |
| 730 | 29 | 49 | 173.9 (132.6 to 219.0) | 289.9 (237.1 to 344.7) | 116.0 (52.1 to 187.5) | 1.67 (1.25 to 2.35) | 1.71 (1.09 to 2.93) |
| 1095 | 24 | 48 | 253.3 (203.4 to 312.2) | 450.6 (377.3 to 517.3) | 197.3 (112.7 to 291.8) | 1.78 (1.38 to 2.33) | 2.04 (1.28 to 3.43) |
| 1460 | 34 | 50 | 388.6 (324.4 to 457.4) | 649.3 (561.1 to 739.1) | 260.8 (143.6 to 371.5) | 1.67 (1.33 to 2.10) | 1.51 (1.00 to 2.39) |
| 1825 | 19 | 27 | 479.9 (401.6 to 561.4) | 780.5 (677.7 to 882.0) | 300.6 (178.2 to 432.3) | 1.63 (1.32 to 2.01) | 1.46 (0.79 to 2.66) |
| 2190 | 21 | 29 | 602.2 (509.5 to 703.6) | 946.3 (843.7 to 1057.9) | 344.1 (198.5 to 485.7) | 1.57 (1.30 to 1.91) | 1.43 (0.82 to 2.74) |
| 2555 | 15 | 16 | 704.9 (592.6 to 811.9) | 1061.5 (937.1 to 1184.7) | 356.5 (201.6 to 522.3) | 1.51 (1.26 to 1.85) | 1.11 (0.52 to 2.51) |
| 2920 | 11 | 10 | 806.6 (680.8 to 929.3) | 1151.7 (1021.7 to 1284.6) | 345.1 (183.1 to 526.0) | 1.43 (1.20 to 1.74) | 0.95 (0.35 to 2.26) |
| 3285 | 17 | 12 | 1010.0 (859.8 to 1168.1) | 1292.3 (1147.3 to 1463.2) | 282.3 (85.1 to 508.5) | 1.28 (1.08 to 1.57) | 0.74 (0.35 to 1.58) |
| 3650 | 5 | 10 | 1096.4 (923.8 to 1279.7) | 1467.0 (1285.2 to 1684.9) | 370.6 (142.0 to 628.0) | 1.34 (1.12 to 1.65) | *** |
| 4015 | 3 | 8 | 1183.0 (995.7 to 1385.4) | 1694.2 (1451.6 to 1963.9) | 511.2 (200.8 to 823.6) | 1.43 (1.15 to 1.77) | *** |
| 4380 | 3 | 4 | 1328.6 (1087.8 to 1595.5) | 1880.2 (1631.6 to 2219.9) | 551.7 (144.4 to 939.2) | 1.42 (1.09 to 1.81) | *** |
| 4745 | 1 | 1 | 1531.0 (1163.1 to 2023.1) | 2017.6 (1661.2 to 2452.6) | 486.6 (-185.8 to 1078.2) | 1.32 (0.91 to 1.88) | *** |
| 5110 | 0 | 0 | 1531.0 (1163.1 to 2023.1) | 2017.6 (1661.2 to 2452.6) | 486.6 (-185.8 to 1078.2) | 1.32 (0.91 to 1.88) | *** |
| **Cause: Endocrine** | | | | | | | |
| 30 | 0 | 2 | 0.0 (0.0 to 0.0) | 4.7 (0.0 to 11.8) | 4.7 (0.0 to 11.8) | *** | *** |
| 90 | 0 | 3 | 0.0 (0.0 to 0.0) | 11.9 (2.4 to 23.7) | 11.9 (2.4 to 23.7) | *** | *** |
| 180 | 5 | 10 | 12.4 (2.5 to 24.7) | 36.5 (19.2 to 56.1) | 24.1 (4.4 to 46.2) | *** | *** |
| 365 | 6 | 17 | 28.0 (12.6 to 45.6) | 80.3 (52.4 to 110.2) | 52.4 (22.1 to 86.8) | 2.87 (1.56 to 6.99) | 2.85 (1.19 to 10.57) |
| 730 | 12 | 21 | 62.7 (38.8 to 92.3) | 141.4 (103.5 to 180.4) | 78.7 (33.0 to 124.2) | 2.25 (1.39 to 3.88) | 1.77 (0.89 to 4.05) |
| 1095 | 11 | 22 | 100.4 (68.7 to 138.0) | 215.5 (168.3 to 265.6) | 115.1 (54.1 to 173.1) | 2.15 (1.41 to 3.31) | 2.04 (0.96 to 4.66) |
| 1460 | 6 | 14 | 124.3 (86.6 to 170.2) | 271.4 (216.2 to 328.8) | 147.1 (77.9 to 217.4) | 2.18 (1.50 to 3.29) | 2.39 (1.02 to 7.69) |
| 1825 | 8 | 14 | 163.9 (117.1 to 215.9) | 339.1 (274.8 to 407.3) | 175.2 (95.7 to 263.5) | 2.07 (1.48 to 3.12) | 1.80 (0.77 to 5.49) |
| 2190 | 6 | 13 | 199.4 (143.8 to 259.3) | 413.8 (339.4 to 492.5) | 214.5 (115.8 to 310.0) | 2.08 (1.49 to 3.04) | *** |
| 2555 | 4 | 8 | 227.0 (166.2 to 296.5) | 470.7 (379.1 to 561.4) | 243.6 (136.8 to 350.8) | 2.07 (1.50 to 2.97) | *** |
| 2920 | 6 | 13 | 280.9 (206.3 to 361.0) | 589.5 (478.2 to 697.3) | 308.6 (177.6 to 435.4) | 2.10 (1.53 to 2.98) | *** |
| 3285 | 1 | 10 | 292.9 (212.1 to 376.0) | 703.1 (580.6 to 839.1) | 410.2 (265.7 to 564.1) | 2.40 (1.76 to 3.47) | *** |
| 3650 | 0 | 3 | 292.9 (212.1 to 376.0) | 754.2 (618.8 to 898.4) | 461.3 (303.2 to 620.7) | 2.57 (1.87 to 3.72) | *** |
| 4015 | 0 | 2 | 292.9 (212.1 to 376.0) | 799.2 (652.6 to 960.5) | 506.3 (332.9 to 685.6) | 2.73 (1.97 to 3.92) | *** |
| 4380 | 0 | 3 | 292.9 (212.1 to 376.0) | 945.3 (735.9 to 1219.0) | 652.4 (426.9 to 930.1) | 3.23 (2.24 to 4.78) | *** |
| 4745 | 1 | 0 | 477.6 (237.7 to 943.8) | 945.3 (735.9 to 1219.0) | 467.8 (-18.7 to 821.4) | 1.98 (0.98 to 4.17) | *** |
| 5110 | 0 | 0 | 477.6 (237.7 to 943.8) | 945.3 (735.9 to 1219.0) | 467.8 (-18.7 to 821.4) | 1.98 (0.98 to 4.17) | *** |
| **Cause: Respiratory** | | | | | | | |
| 30 | 3 | 9 | 7.1 (0.0 to 15.4) | 21.1 (7.0 to 36.4) | 14.0 (-0.1 to 30.5) | *** | *** |
| 90 | 2 | 13 | 11.8 (2.4 to 23.6) | 52.2 (30.8 to 74.6) | 40.4 (18.9 to 66.3) | 4.42 (1.90 to 23.55) | *** |
| 180 | 5 | 19 | 24.1 (11.9 to 38.6) | 99.0 (72.2 to 130.7) | 74.9 (39.2 to 110.8) | 4.11 (2.16 to 8.44) | 3.81 (1.51 to 17.07) |
| 365 | 1 | 28 | 26.6 (12.2 to 41.5) | 171.1 (132.4 to 211.7) | 144.5 (100.1 to 186.4) | 6.43 (3.92 to 13.81) | *** |
| 730 | 11 | 54 | 58.6 (33.7 to 82.8) | 326.2 (267.9 to 387.6) | 267.6 (204.3 to 329.0) | 5.57 (3.65 to 9.67) | 4.97 (2.73 to 11.24) |
| 1095 | 11 | 38 | 95.1 (64.0 to 128.0) | 454.0 (386.8 to 528.6) | 358.9 (283.9 to 431.2) | 4.77 (3.51 to 7.13) | 3.52 (1.84 to 8.27) |
| 1460 | 4 | 29 | 111.4 (75.5 to 148.6) | 570.5 (492.4 to 663.7) | 459.1 (373.5 to 541.2) | 5.12 (3.70 to 7.53) | 7.43 (3.21 to 37.39) |
| 1825 | 12 | 37 | 170.2 (123.8 to 220.0) | 748.9 (655.8 to 864.2) | 578.7 (476.3 to 702.3) | 4.40 (3.31 to 6.13) | 3.18 (1.72 to 6.82) |
| 2190 | 9 | 16 | 223.4 (163.6 to 283.4) | 840.7 (743.6 to 970.6) | 617.3 (496.8 to 751.1) | 3.76 (2.82 to 5.29) | 1.84 (0.81 to 5.19) |
| 2555 | 10 | 21 | 295.1 (223.5 to 374.2) | 989.5 (862.9 to 1133.4) | 694.4 (544.2 to 846.1) | 3.35 (2.55 to 4.43) | 2.19 (1.04 to 5.47) |
| 2920 | 6 | 18 | 346.8 (263.4 to 439.8) | 1152.8 (1005.2 to 1310.7) | 805.9 (633.6 to 975.3) | 3.32 (2.55 to 4.36) | 3.14 (1.37 to 10.47) |
| 3285 | 1 | 16 | 357.9 (274.7 to 455.8) | 1342.0 (1157.6 to 1526.6) | 984.1 (780.5 to 1179.0) | 3.75 (2.81 to 5.01) | *** |
| 3650 | 3 | 2 | 414.3 (312.4 to 529.8) | 1380.9 (1189.9 to 1579.3) | 966.7 (742.5 to 1185.2) | 3.33 (2.51 to 4.45) | *** |
| 4015 | 2 | 1 | 479.0 (357.9 to 638.2) | 1408.9 (1214.2 to 1608.4) | 929.9 (674.5 to 1165.7) | 2.94 (2.10 to 4.09) | *** |
| 4380 | 2 | 2 | 565.3 (391.1 to 766.0) | 1507.7 (1291.0 to 1771.2) | 942.4 (659.2 to 1237.5) | 2.67 (1.90 to 3.92) | *** |
| 4745 | 1 | 1 | 665.1 (425.8 to 948.9) | 1747.9 (1333.9 to 2376.7) | 1082.9 (553.5 to 1748.9) | 2.63 (1.64 to 4.49) | *** |
| 5110 | 0 | 0 | 665.1 (425.8 to 948.9) | 1747.9 (1333.9 to 2376.7) | 1082.9 (553.5 to 1748.9) | 2.63 (1.64 to 4.49) | *** |
| **Cause: External** | | | | | | | |
| 30 | 1 | 2 | 2.3 (0.0 to 7.0) | 4.7 (0.0 to 11.7) | 2.3 (-4.7 to 11.7) | *** | *** |
| 90 | 2 | 6 | 7.1 (0.0 to 15.5) | 19.0 (7.2 to 35.6) | 11.9 (-0.0 to 28.6) | *** | *** |
| 180 | 1 | 4 | 9.5 (2.3 to 20.4) | 28.9 (14.4 to 46.1) | 19.3 (2.5 to 38.5) | *** | *** |
| 365 | 7 | 9 | 27.8 (12.6 to 48.3) | 51.9 (32.3 to 73.6) | 24.2 (0.6 to 53.4) | 1.87 (1.01 to 4.61) | *** |
| 730 | 10 | 11 | 56.7 (32.2 to 83.6) | 84.1 (58.3 to 117.6) | 27.4 (-6.8 to 64.4) | 1.48 (0.89 to 2.83) | 1.11 (0.47 to 2.84) |
| 1095 | 9 | 9 | 86.9 (55.3 to 120.1) | 114.9 (82.7 to 148.7) | 28.0 (-16.2 to 74.7) | 1.32 (0.85 to 2.20) | *** |
| 1460 | 4 | 17 | 103.1 (70.9 to 142.9) | 183.3 (140.2 to 229.3) | 80.2 (25.3 to 141.7) | 1.78 (1.19 to 2.85) | *** |
| 1825 | 9 | 8 | 146.5 (104.4 to 197.3) | 222.3 (168.2 to 276.2) | 75.8 (8.0 to 145.9) | 1.52 (1.04 to 2.29) | *** |
| 2190 | 6 | 9 | 180.6 (130.2 to 238.0) | 274.4 (214.4 to 337.0) | 93.8 (17.3 to 173.8) | 1.52 (1.09 to 2.23) | *** |
| 2555 | 1 | 5 | 187.1 (133.2 to 245.5) | 310.9 (244.7 to 376.8) | 123.7 (35.6 to 216.1) | 1.66 (1.17 to 2.49) | *** |
| 2920 | 5 | 3 | 231.2 (167.4 to 304.8) | 338.6 (263.2 to 407.9) | 107.3 (8.9 to 202.5) | 1.46 (1.03 to 2.10) | *** |
| 3285 | 1 | 3 | 244.9 (175.4 to 322.4) | 372.3 (292.0 to 451.7) | 127.4 (16.5 to 224.0) | 1.52 (1.05 to 2.17) | *** |
| 3650 | 2 | 0 | 280.2 (190.3 to 377.1) | 372.3 (292.0 to 451.7) | 92.1 (-23.1 to 199.0) | 1.33 (0.94 to 1.91) | *** |
| 4015 | 0 | 3 | 280.2 (190.3 to 377.1) | 463.7 (337.8 to 606.6) | 183.5 (30.2 to 349.6) | 1.65 (1.09 to 2.56) | *** |
| 4380 | 0 | 0 | 280.2 (190.3 to 377.1) | 463.7 (337.8 to 606.6) | 183.5 (30.2 to 349.6) | 1.65 (1.09 to 2.56) | *** |
| 4745 | 0 | 0 | 280.2 (190.3 to 377.1) | 463.7 (337.8 to 606.6) | 183.5 (30.2 to 349.6) | 1.65 (1.09 to 2.56) | *** |
| 5110 | 0 | 0 | 280.2 (190.3 to 377.1) | 463.7 (337.8 to 606.6) | 183.5 (30.2 to 349.6) | 1.65 (1.09 to 2.56) | *** |

*** IRR/RR was not estimated when there were fewer than 20 events in the risk period or fewer than 5 events in one group.

# Supplementary Table 14. Estimated risk of death by cause-specific (defined by ICD-10 chapters) comparing treated Tuberculosis cases compared to non-exposed controls in Males.

|  | **Number of events** | | **Risk per 100,000** | |  |  |  |
| --- | --- | --- | --- | --- | --- | --- | --- |
| **Time - Days** | **Unexposed** | **Exposed** | **Unexposed** | **Exposed** | **Risk difference per 100,000 - 95% CI** | **Risk ratio - 95% CI** | **Incidence rate ratio - 95% CI** |
| **Cause: All-cause** | | | | | | | |
| 30 | 35 | 109 | 51.0 (37.8 to 68.6) | 158.8 (129.6 to 187.9) | 107.8 (74.3 to 136.9) | 3.11 (2.20 to 4.46) | 3.12 (2.20 to 4.46) |
| 90 | 74 | 264 | 160.8 (135.0 to 191.9) | 551.2 (492.2 to 609.6) | 390.4 (326.6 to 451.5) | 3.43 (2.76 to 4.21) | 3.58 (2.76 to 4.65) |
| 180 | 97 | 342 | 309.3 (272.7 to 350.8) | 1075.6 (1001.9 to 1144.4) | 766.4 (677.9 to 856.0) | 3.48 (3.00 to 4.01) | 3.55 (2.92 to 4.41) |
| 365 | 189 | 624 | 618.0 (555.3 to 675.6) | 2093.7 (1986.6 to 2196.7) | 1475.7 (1357.3 to 1585.9) | 3.39 (3.05 to 3.78) | 3.34 (2.85 to 3.94) |
| 730 | 336 | 1005 | 1238.5 (1154.4 to 1318.1) | 3949.5 (3810.5 to 4090.4) | 2711.0 (2544.8 to 2865.5) | 3.19 (2.95 to 3.43) | 3.05 (2.71 to 3.46) |
| 1095 | 327 | 794 | 1959.9 (1843.5 to 2086.0) | 5698.1 (5515.7 to 5871.2) | 3738.1 (3523.1 to 3942.2) | 2.91 (2.70 to 3.11) | 2.51 (2.21 to 2.87) |
| 1460 | 284 | 681 | 2712.0 (2564.3 to 2861.3) | 7513.0 (7296.1 to 7718.9) | 4801.0 (4547.2 to 5065.6) | 2.77 (2.60 to 2.95) | 2.50 (2.22 to 2.86) |
| 1825 | 230 | 502 | 3457.9 (3295.6 to 3621.2) | 9142.3 (8902.8 to 9391.6) | 5684.4 (5401.1 to 5967.9) | 2.64 (2.52 to 2.80) | 2.30 (1.99 to 2.67) |
| 2190 | 160 | 408 | 4080.9 (3892.0 to 4288.6) | 10739.2 (10448.2 to 11031.8) | 6658.3 (6294.8 to 6990.0) | 2.63 (2.49 to 2.78) | 2.71 (2.23 to 3.30) |
| 2555 | 133 | 284 | 4717.8 (4509.4 to 4947.6) | 12097.7 (11774.5 to 12398.2) | 7379.9 (7019.1 to 7771.7) | 2.56 (2.43 to 2.70) | 2.29 (1.89 to 2.82) |
| 2920 | 108 | 249 | 5387.5 (5136.2 to 5627.7) | 13632.6 (13274.6 to 14028.1) | 8245.0 (7837.3 to 8700.2) | 2.53 (2.40 to 2.67) | 2.50 (2.00 to 3.15) |
| 3285 | 92 | 176 | 6156.9 (5860.2 to 6442.7) | 15082.3 (14696.2 to 15509.6) | 8925.4 (8417.3 to 9429.5) | 2.45 (2.32 to 2.60) | 2.09 (1.64 to 2.78) |
| 3650 | 51 | 107 | 6762.3 (6423.5 to 7094.2) | 16354.9 (15909.7 to 16847.1) | 9592.6 (9045.0 to 10170.4) | 2.42 (2.28 to 2.55) | 2.31 (1.72 to 3.33) |
| 4015 | 36 | 74 | 7549.3 (7115.3 to 7995.0) | 17839.0 (17305.6 to 18407.8) | 10289.7 (9587.1 to 10999.0) | 2.36 (2.22 to 2.52) | 2.29 (1.60 to 3.65) |
| 4380 | 13 | 32 | 8151.7 (7567.6 to 8661.2) | 19258.9 (18517.6 to 20049.1) | 11107.2 (10181.4 to 12042.6) | 2.36 (2.19 to 2.54) | 2.76 (1.56 to 5.55) |
| 4745 | 7 | 1 | 9239.3 (8230.2 to 10192.3) | 19361.0 (18623.6 to 20173.7) | 10121.6 (8813.3 to 11336.8) | 2.10 (1.87 to 2.35) | *** |
| 5110 | 2 | 1 | 10353.8 (8812.3 to 12245.0) | 19928.8 (18804.2 to 21665.0) | 9575.0 (7283.1 to 11904.2) | 1.92 (1.61 to 2.30) | *** |
| **Cause: Natural - excluding (HIV/TB and external causes)** | | | | | | | |
| 30 | 26 | 72 | 37.9 (24.8 to 52.5) | 104.9 (82.3 to 126.8) | 67.0 (40.8 to 91.8) | 2.77 (1.85 to 4.24) | 2.77 (1.85 to 4.25) |
| 90 | 49 | 179 | 110.6 (88.4 to 135.7) | 370.9 (323.6 to 416.4) | 260.3 (210.0 to 313.3) | 3.35 (2.65 to 4.25) | 3.66 (2.68 to 5.01) |
| 180 | 67 | 212 | 213.2 (182.2 to 244.4) | 695.8 (633.8 to 753.5) | 482.6 (415.3 to 546.0) | 3.26 (2.75 to 3.86) | 3.18 (2.49 to 4.09) |
| 365 | 125 | 411 | 417.0 (373.9 to 465.5) | 1366.4 (1272.8 to 1446.8) | 949.4 (845.7 to 1039.6) | 3.28 (2.89 to 3.69) | 3.32 (2.75 to 3.99) |
| 730 | 229 | 648 | 840.4 (773.6 to 913.1) | 2565.1 (2440.4 to 2690.2) | 1724.7 (1573.1 to 1861.4) | 3.05 (2.75 to 3.35) | 2.89 (2.49 to 3.34) |
| 1095 | 238 | 527 | 1364.3 (1266.0 to 1470.0) | 3725.5 (3571.8 to 3872.3) | 2361.2 (2176.4 to 2533.5) | 2.73 (2.49 to 2.96) | 2.29 (1.95 to 2.66) |
| 1460 | 212 | 460 | 1924.9 (1805.6 to 2051.1) | 4951.8 (4772.3 to 5135.5) | 3026.9 (2814.8 to 3246.5) | 2.57 (2.39 to 2.76) | 2.26 (1.97 to 2.63) |
| 1825 | 179 | 355 | 2504.7 (2359.5 to 2640.8) | 6105.6 (5892.2 to 6351.6) | 3600.9 (3353.4 to 3850.8) | 2.44 (2.28 to 2.60) | 2.09 (1.76 to 2.54) |
| 2190 | 109 | 281 | 2926.9 (2771.8 to 3095.2) | 7207.1 (6973.2 to 7490.5) | 4280.1 (4010.8 to 4558.8) | 2.46 (2.32 to 2.61) | 2.74 (2.19 to 3.48) |
| 2555 | 93 | 201 | 3371.3 (3196.0 to 3565.0) | 8167.3 (7911.1 to 8462.8) | 4796.0 (4507.1 to 5099.0) | 2.42 (2.27 to 2.57) | 2.32 (1.85 to 2.99) |
| 2920 | 77 | 179 | 3848.4 (3654.8 to 4073.4) | 9272.9 (8988.7 to 9606.0) | 5424.5 (5082.3 to 5790.4) | 2.41 (2.27 to 2.56) | 2.52 (1.98 to 3.25) |
| 3285 | 68 | 129 | 4414.6 (4174.7 to 4660.3) | 10338.9 (10013.2 to 10738.0) | 5924.3 (5512.4 to 6328.5) | 2.34 (2.19 to 2.48) | 2.07 (1.62 to 2.87) |
| 3650 | 40 | 90 | 4886.4 (4608.0 to 5172.8) | 11413.3 (11026.9 to 11849.3) | 6527.0 (6055.9 to 7008.2) | 2.34 (2.19 to 2.49) | 2.48 (1.77 to 3.71) |
| 4015 | 26 | 57 | 5460.2 (5072.0 to 5845.1) | 12579.8 (12105.0 to 13118.4) | 7119.6 (6500.5 to 7729.6) | 2.30 (2.14 to 2.49) | 2.44 (1.61 to 4.04) |
| 4380 | 12 | 25 | 6013.0 (5504.6 to 6522.9) | 13640.3 (13043.4 to 14308.4) | 7627.4 (6852.4 to 8488.6) | 2.27 (2.07 to 2.48) | 2.33 (1.18 to 5.05) |
| 4745 | 7 | 1 | 7100.6 (6175.3 to 8017.2) | 13742.4 (13160.0 to 14432.3) | 6641.8 (5425.8 to 7753.9) | 1.94 (1.68 to 2.24) | *** |
| 5110 | 2 | 0 | 8215.1 (6701.5 to 10128.7) | 13742.4 (13160.0 to 14432.3) | 5527.3 (3604.5 to 7226.3) | 1.67 (1.36 to 2.07) | *** |
| **Cause: Cancer** | | | | | | | |
| 30 | 5 | 19 | 7.3 (1.5 to 14.6) | 27.7 (16.0 to 40.7) | 20.4 (7.2 to 34.9) | 3.79 (1.64 to 17.47) | 3.80 (1.65 to 17.53) |
| 90 | 5 | 56 | 14.7 (5.9 to 23.5) | 110.9 (85.8 to 134.8) | 96.2 (68.0 to 122.7) | 7.53 (4.42 to 17.57) | 11.23 (5.43 to 49.16) |
| 180 | 15 | 54 | 37.7 (24.1 to 52.5) | 193.6 (161.4 to 228.0) | 155.9 (121.3 to 191.0) | 5.14 (3.41 to 8.30) | 3.62 (2.21 to 6.61) |
| 365 | 27 | 91 | 81.8 (60.3 to 105.0) | 342.1 (296.7 to 390.3) | 260.3 (210.9 to 305.9) | 4.18 (3.16 to 5.87) | 3.41 (2.22 to 5.53) |
| 730 | 31 | 147 | 139.2 (110.1 to 168.0) | 613.3 (557.2 to 678.0) | 474.2 (409.7 to 542.1) | 4.41 (3.55 to 5.52) | 4.84 (3.35 to 7.34) |
| 1095 | 45 | 89 | 237.3 (199.3 to 279.2) | 808.4 (731.7 to 879.3) | 571.1 (484.9 to 659.4) | 3.41 (2.78 to 4.12) | 2.04 (1.43 to 3.01) |
| 1460 | 43 | 83 | 351.9 (303.4 to 407.5) | 1029.2 (938.5 to 1109.5) | 677.3 (577.5 to 777.7) | 2.93 (2.46 to 3.49) | 2.01 (1.39 to 2.94) |
| 1825 | 31 | 73 | 452.0 (387.0 to 514.0) | 1265.6 (1163.5 to 1360.0) | 813.6 (706.2 to 933.9) | 2.80 (2.41 to 3.30) | 2.48 (1.70 to 3.94) |
| 2190 | 20 | 49 | 529.1 (455.6 to 595.9) | 1457.2 (1344.3 to 1566.1) | 928.1 (803.3 to 1059.8) | 2.75 (2.40 to 3.24) | 2.61 (1.56 to 4.77) |
| 2555 | 11 | 35 | 581.9 (503.2 to 651.2) | 1623.6 (1500.1 to 1740.6) | 1041.6 (901.5 to 1191.6) | 2.79 (2.44 to 3.25) | 3.42 (1.89 to 7.51) |
| 2920 | 18 | 33 | 691.7 (594.7 to 773.9) | 1826.0 (1686.3 to 1964.2) | 1134.3 (977.7 to 1301.7) | 2.64 (2.28 to 3.14) | 1.99 (1.14 to 3.53) |
| 3285 | 14 | 25 | 808.1 (692.8 to 917.2) | 2031.7 (1881.7 to 2212.0) | 1223.6 (1052.2 to 1415.7) | 2.51 (2.18 to 2.99) | 1.95 (0.99 to 4.10) |
| 3650 | 9 | 23 | 914.5 (776.1 to 1051.8) | 2303.8 (2117.5 to 2516.6) | 1389.3 (1156.5 to 1607.5) | 2.52 (2.13 to 3.00) | 2.82 (1.25 to 7.28) |
| 4015 | 5 | 5 | 1014.7 (865.5 to 1183.2) | 2392.8 (2182.6 to 2622.2) | 1378.1 (1097.9 to 1646.7) | 2.36 (1.94 to 2.82) | *** |
| 4380 | 2 | 8 | 1098.9 (916.9 to 1323.8) | 2695.7 (2398.5 to 3027.4) | 1596.8 (1204.2 to 1973.1) | 2.45 (1.93 to 3.04) | *** |
| 4745 | 2 | 0 | 1435.9 (1008.2 to 1957.0) | 2695.7 (2398.5 to 3027.4) | 1259.7 (660.9 to 1788.6) | 1.88 (1.35 to 2.70) | *** |
| 5110 | 0 | 0 | 1435.9 (1008.2 to 1957.0) | 2695.7 (2398.5 to 3027.4) | 1259.7 (660.9 to 1788.6) | 1.88 (1.35 to 2.70) | *** |
| **Cause: Cardiovascular** | | | | | | | |
| 30 | 7 | 16 | 10.2 (4.4 to 18.3) | 23.3 (12.4 to 35.7) | 13.1 (-0.1 to 26.2) | 2.28 (1.00 to 7.17) | 2.29 (1.00 to 7.18) |
| 90 | 23 | 32 | 44.3 (29.6 to 62.0) | 70.8 (50.1 to 90.7) | 26.5 (0.8 to 51.0) | 1.60 (1.02 to 2.54) | 1.39 (0.81 to 2.45) |
| 180 | 24 | 40 | 81.1 (61.5 to 103.0) | 132.1 (104.5 to 157.2) | 51.0 (18.7 to 84.4) | 1.63 (1.20 to 2.27) | 1.68 (1.04 to 2.96) |
| 365 | 34 | 85 | 136.6 (108.6 to 165.8) | 270.9 (231.3 to 312.9) | 134.2 (85.9 to 182.7) | 1.98 (1.54 to 2.63) | 2.53 (1.59 to 4.08) |
| 730 | 86 | 142 | 295.7 (255.1 to 338.1) | 533.7 (475.2 to 592.7) | 238.1 (161.5 to 307.4) | 1.81 (1.49 to 2.15) | 1.69 (1.30 to 2.16) |
| 1095 | 84 | 114 | 483.1 (427.8 to 550.5) | 786.7 (714.0 to 862.0) | 303.5 (212.1 to 395.9) | 1.63 (1.40 to 1.90) | 1.40 (1.09 to 1.87) |
| 1460 | 61 | 96 | 644.9 (576.1 to 715.5) | 1043.4 (955.6 to 1133.1) | 398.5 (298.6 to 501.5) | 1.62 (1.43 to 1.82) | 1.64 (1.20 to 2.26) |
| 1825 | 55 | 71 | 822.2 (740.5 to 900.7) | 1274.6 (1168.4 to 1382.9) | 452.4 (330.5 to 590.5) | 1.55 (1.38 to 1.75) | 1.36 (0.96 to 1.92) |
| 2190 | 40 | 69 | 976.7 (886.5 to 1071.3) | 1544.9 (1420.8 to 1666.6) | 568.3 (421.1 to 704.7) | 1.58 (1.41 to 1.77) | 1.84 (1.28 to 2.80) |
| 2555 | 40 | 55 | 1168.8 (1057.8 to 1282.5) | 1805.3 (1659.9 to 1942.3) | 636.5 (474.4 to 792.4) | 1.54 (1.38 to 1.72) | 1.48 (1.00 to 2.30) |
| 2920 | 21 | 37 | 1299.5 (1182.8 to 1423.8) | 2032.0 (1880.5 to 2188.5) | 732.5 (562.0 to 900.3) | 1.56 (1.40 to 1.74) | 1.91 (1.16 to 3.36) |
| 3285 | 27 | 33 | 1528.2 (1374.3 to 1670.3) | 2306.3 (2121.3 to 2502.4) | 778.1 (553.0 to 1010.9) | 1.51 (1.34 to 1.71) | 1.34 (0.81 to 2.32) |
| 3650 | 14 | 14 | 1690.9 (1522.7 to 1863.3) | 2470.9 (2275.2 to 2686.6) | 780.1 (537.6 to 1063.3) | 1.46 (1.29 to 1.67) | 1.10 (0.48 to 2.51) |
| 4015 | 14 | 15 | 2016.6 (1777.2 to 2250.6) | 2791.0 (2533.3 to 3036.4) | 774.4 (466.8 to 1139.4) | 1.38 (1.22 to 1.62) | 1.19 (0.60 to 2.46) |
| 4380 | 4 | 5 | 2229.5 (1921.9 to 2596.4) | 3007.4 (2724.7 to 3350.8) | 777.9 (334.4 to 1217.5) | 1.35 (1.13 to 1.61) | *** |
| 4745 | 3 | 0 | 2672.7 (2128.3 to 3288.6) | 3007.4 (2724.7 to 3350.8) | 334.8 (-309.8 to 967.1) | 1.13 (0.90 to 1.42) | *** |
| 5110 | 0 | 0 | 2672.7 (2128.3 to 3288.6) | 3007.4 (2724.7 to 3350.8) | 334.8 (-309.8 to 967.1) | 1.13 (0.90 to 1.42) | *** |
| **Cause: Endocrine** | | | | | | | |
| 30 | 3 | 6 | 4.4 (0.0 to 10.2) | 8.7 (2.9 to 16.0) | 4.3 (-3.0 to 13.1) | *** | *** |
| 90 | 5 | 8 | 11.8 (4.4 to 19.3) | 20.6 (10.3 to 32.4) | 8.8 (-4.4 to 22.1) | 1.75 (0.77 to 4.94) | *** |
| 180 | 5 | 14 | 19.5 (9.1 to 29.9) | 42.1 (28.4 to 58.8) | 22.6 (6.0 to 41.9) | 2.16 (1.23 to 4.54) | *** |
| 365 | 10 | 20 | 35.3 (21.5 to 49.1) | 74.8 (54.6 to 97.0) | 39.5 (15.1 to 66.1) | 2.12 (1.34 to 3.57) | 2.02 (0.93 to 5.07) |
| 730 | 16 | 47 | 64.9 (45.9 to 86.6) | 162.1 (128.9 to 196.2) | 97.3 (59.6 to 136.3) | 2.50 (1.73 to 3.69) | 3.00 (1.76 to 5.55) |
| 1095 | 13 | 41 | 92.8 (69.1 to 116.4) | 252.2 (214.5 to 294.3) | 159.4 (113.0 to 205.2) | 2.72 (2.04 to 3.77) | 3.26 (1.87 to 6.85) |
| 1460 | 16 | 35 | 134.5 (102.1 to 165.7) | 345.4 (294.7 to 399.6) | 211.0 (153.0 to 273.6) | 2.57 (1.99 to 3.48) | 2.28 (1.32 to 4.64) |
| 1825 | 12 | 32 | 173.6 (132.9 to 210.4) | 451.6 (389.6 to 519.2) | 278.1 (207.0 to 354.3) | 2.60 (2.02 to 3.47) | 2.81 (1.43 to 6.75) |
| 2190 | 6 | 25 | 196.1 (151.2 to 238.3) | 551.7 (479.6 to 626.5) | 355.7 (270.3 to 442.8) | 2.81 (2.19 to 3.71) | 4.44 (1.95 to 15.42) |
| 2555 | 7 | 15 | 228.4 (180.7 to 279.5) | 624.7 (546.6 to 709.4) | 396.3 (303.1 to 492.8) | 2.74 (2.15 to 3.56) | 2.30 (0.97 to 7.21) |
| 2920 | 2 | 7 | 240.8 (189.4 to 294.3) | 668.5 (587.0 to 758.9) | 427.8 (328.6 to 532.8) | 2.78 (2.20 to 3.62) | *** |
| 3285 | 4 | 11 | 273.4 (213.2 to 340.4) | 758.9 (661.0 to 865.2) | 485.6 (370.5 to 611.6) | 2.78 (2.14 to 3.66) | *** |
| 3650 | 3 | 6 | 308.0 (237.5 to 388.8) | 826.8 (718.0 to 939.7) | 518.8 (382.2 to 654.3) | 2.68 (2.02 to 3.51) | *** |
| 4015 | 1 | 4 | 329.9 (252.4 to 423.6) | 903.8 (775.1 to 1041.8) | 573.9 (418.3 to 737.9) | 2.74 (2.06 to 3.75) | *** |
| 4380 | 1 | 2 | 387.7 (265.8 to 545.7) | 987.6 (817.8 to 1175.2) | 599.9 (370.3 to 828.8) | 2.55 (1.72 to 3.92) | *** |
| 4745 | 0 | 0 | 387.7 (265.8 to 545.7) | 987.6 (817.8 to 1175.2) | 599.9 (370.3 to 828.8) | 2.55 (1.72 to 3.92) | *** |
| 5110 | 0 | 0 | 387.7 (265.8 to 545.7) | 987.6 (817.8 to 1175.2) | 599.9 (370.3 to 828.8) | 2.55 (1.72 to 3.92) | *** |
| **Cause: Respiratory** | | | | | | | |
| 30 | 1 | 14 | 1.4 (0.0 to 4.4) | 20.4 (11.6 to 30.7) | 19.0 (9.5 to 30.6) | *** | *** |
| 90 | 3 | 31 | 5.9 (1.4 to 11.9) | 66.5 (48.9 to 87.9) | 60.7 (41.5 to 80.7) | *** | *** |
| 180 | 9 | 47 | 19.7 (10.5 to 31.7) | 138.6 (111.6 to 164.7) | 118.9 (90.9 to 148.2) | 7.03 (4.18 to 14.00) | 5.25 (2.77 to 12.46) |
| 365 | 16 | 85 | 45.9 (31.1 to 63.1) | 277.2 (233.8 to 318.6) | 231.3 (187.3 to 273.1) | 6.04 (4.25 to 8.82) | 5.37 (3.20 to 10.22) |
| 730 | 28 | 127 | 98.5 (73.0 to 127.5) | 513.2 (453.8 to 570.5) | 414.7 (346.0 to 478.1) | 5.21 (3.83 to 7.21) | 4.63 (3.01 to 7.39) |
| 1095 | 26 | 110 | 155.5 (122.2 to 192.1) | 756.2 (690.2 to 830.7) | 600.7 (524.3 to 682.6) | 4.86 (3.83 to 6.42) | 4.37 (2.90 to 6.92) |
| 1460 | 21 | 105 | 211.0 (169.8 to 256.6) | 1036.1 (942.1 to 1123.4) | 825.1 (723.5 to 929.7) | 4.91 (3.96 to 6.23) | 5.21 (3.48 to 8.83) |
| 1825 | 23 | 49 | 284.6 (227.1 to 341.8) | 1196.7 (1092.9 to 1293.6) | 912.1 (809.5 to 1031.2) | 4.20 (3.46 to 5.24) | 2.24 (1.50 to 3.91) |
| 2190 | 12 | 49 | 331.9 (274.3 to 396.8) | 1388.2 (1274.1 to 1498.5) | 1056.2 (927.4 to 1180.5) | 4.18 (3.47 to 5.19) | 4.35 (2.50 to 9.18) |
| 2555 | 11 | 34 | 384.9 (322.2 to 460.2) | 1551.5 (1410.4 to 1674.8) | 1166.6 (1016.0 to 1308.8) | 4.03 (3.35 to 4.91) | 3.32 (1.76 to 7.05) |
| 2920 | 10 | 35 | 448.0 (371.5 to 534.9) | 1768.6 (1620.7 to 1916.1) | 1320.6 (1152.5 to 1491.4) | 3.95 (3.29 to 4.84) | 3.79 (2.00 to 9.41) |
| 3285 | 5 | 19 | 490.6 (409.9 to 580.5) | 1925.9 (1758.7 to 2103.0) | 1435.3 (1257.0 to 1631.2) | 3.93 (3.25 to 4.80) | 4.16 (1.83 to 18.59) |
| 3650 | 1 | 23 | 505.4 (422.8 to 600.2) | 2210.8 (2019.6 to 2402.8) | 1705.4 (1494.6 to 1929.4) | 4.37 (3.63 to 5.44) | *** |
| 4015 | 2 | 13 | 546.7 (435.9 to 658.2) | 2471.9 (2234.2 to 2717.5) | 1925.2 (1662.8 to 2207.3) | 4.52 (3.68 to 5.71) | *** |
| 4380 | 0 | 5 | 546.7 (435.9 to 658.2) | 2698.3 (2424.6 to 3030.4) | 2151.6 (1847.7 to 2493.6) | 4.94 (3.98 to 6.22) | *** |
| 4745 | 0 | 1 | 546.7 (435.9 to 658.2) | 2800.4 (2485.4 to 3208.7) | 2253.7 (1916.2 to 2651.0) | 5.12 (4.16 to 6.51) | *** |
| 5110 | 0 | 0 | 546.7 (435.9 to 658.2) | 2800.4 (2485.4 to 3208.7) | 2253.7 (1916.2 to 2651.0) | 5.12 (4.16 to 6.51) | *** |
| **Cause: External** | | | | | | | |
| 30 | 9 | 19 | 13.1 (5.8 to 21.2) | 27.6 (16.0 to 39.3) | 14.5 (-0.0 to 29.1) | 2.11 (1.00 to 5.35) | 2.11 (1.00 to 5.36) |
| 90 | 23 | 43 | 47.2 (31.1 to 62.8) | 91.6 (70.9 to 115.4) | 44.4 (19.2 to 72.4) | 1.94 (1.31 to 3.06) | 1.87 (1.12 to 3.17) |
| 180 | 29 | 70 | 91.6 (69.0 to 114.1) | 199.1 (167.3 to 232.6) | 107.5 (66.9 to 151.8) | 2.17 (1.64 to 3.03) | 2.43 (1.62 to 3.88) |
| 365 | 61 | 119 | 191.5 (156.4 to 225.7) | 393.7 (343.2 to 441.9) | 202.2 (136.5 to 261.3) | 2.06 (1.63 to 2.55) | 1.97 (1.44 to 2.79) |
| 730 | 105 | 229 | 384.9 (332.0 to 436.2) | 815.4 (745.6 to 888.0) | 430.4 (342.1 to 517.3) | 2.12 (1.83 to 2.50) | 2.23 (1.79 to 2.83) |
| 1095 | 86 | 159 | 575.7 (507.5 to 640.2) | 1165.6 (1087.8 to 1257.2) | 589.9 (489.5 to 704.9) | 2.02 (1.79 to 2.33) | 1.91 (1.49 to 2.51) |
| 1460 | 63 | 135 | 743.4 (662.9 to 821.2) | 1525.6 (1419.2 to 1633.0) | 782.2 (664.5 to 924.6) | 2.05 (1.83 to 2.34) | 2.23 (1.72 to 2.99) |
| 1825 | 51 | 102 | 909.4 (818.7 to 996.6) | 1856.6 (1738.7 to 1985.2) | 947.1 (806.4 to 1104.3) | 2.04 (1.83 to 2.31) | 2.11 (1.59 to 2.91) |
| 2190 | 42 | 84 | 1074.6 (976.5 to 1174.6) | 2184.8 (2045.8 to 2329.5) | 1110.2 (946.5 to 1307.4) | 2.03 (1.80 to 2.28) | 2.13 (1.47 to 3.19) |
| 2555 | 39 | 57 | 1262.6 (1140.7 to 1379.2) | 2458.6 (2305.8 to 2616.6) | 1196.0 (1009.7 to 1393.6) | 1.95 (1.74 to 2.19) | 1.57 (1.02 to 2.35) |
| 2920 | 31 | 46 | 1455.3 (1312.4 to 1599.3) | 2739.4 (2580.9 to 2912.2) | 1284.1 (1063.2 to 1506.3) | 1.88 (1.68 to 2.12) | 1.61 (0.97 to 2.66) |
| 3285 | 21 | 30 | 1631.9 (1466.4 to 1799.6) | 2988.2 (2805.3 to 3181.4) | 1356.3 (1109.5 to 1622.4) | 1.83 (1.64 to 2.07) | 1.56 (0.87 to 2.90) |
| 3650 | 11 | 13 | 1765.5 (1597.3 to 1940.4) | 3140.3 (2940.8 to 3354.4) | 1374.7 (1093.9 to 1682.7) | 1.78 (1.56 to 2.02) | 1.30 (0.53 to 3.01) |
| 4015 | 8 | 12 | 1938.7 (1726.8 to 2156.7) | 3360.4 (3118.5 to 3596.0) | 1421.7 (1099.0 to 1747.5) | 1.73 (1.52 to 1.99) | 1.67 (0.66 to 5.56) |
| 4380 | 1 | 6 | 1988.3 (1750.3 to 2230.9) | 3681.1 (3330.2 to 4083.1) | 1692.7 (1264.0 to 2120.9) | 1.85 (1.59 to 2.16) | *** |
| 4745 | 0 | 0 | 1988.3 (1750.3 to 2230.9) | 3681.1 (3330.2 to 4083.1) | 1692.7 (1264.0 to 2120.9) | 1.85 (1.59 to 2.16) | *** |
| 5110 | 0 | 1 | 1988.3 (1750.3 to 2230.9) | 4248.9 (3403.8 to 5785.5) | 2260.6 (1361.0 to 3807.0) | 2.14 (1.65 to 2.97) | *** |

*** IRR/RR was not estimated when there were fewer than 20 events in the risk period or fewer than 5 events in one group.


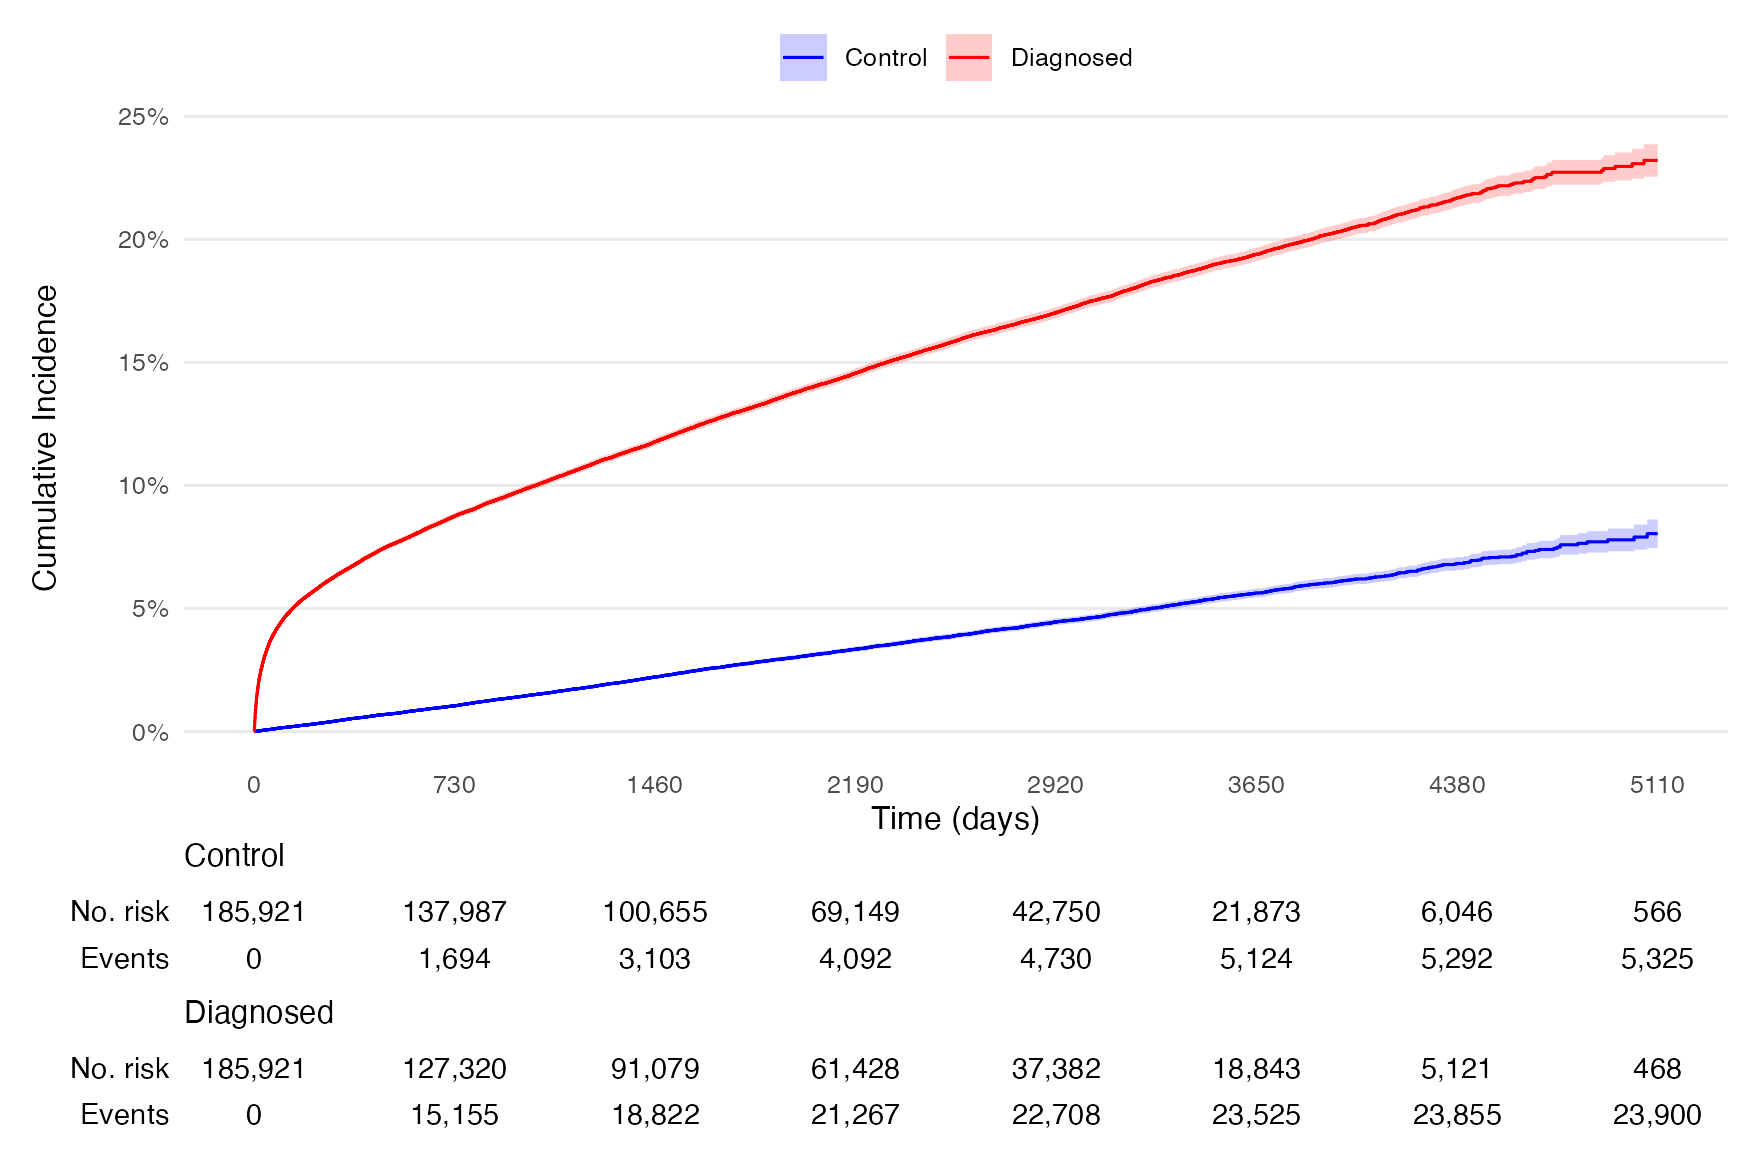


# Supplementary Figure 1. Cumulative incidence curve of all-cause mortality in the diagnosed tuberculosis cases and the unexposed control group. Shaded areas indicate the 95% confidence intervals.


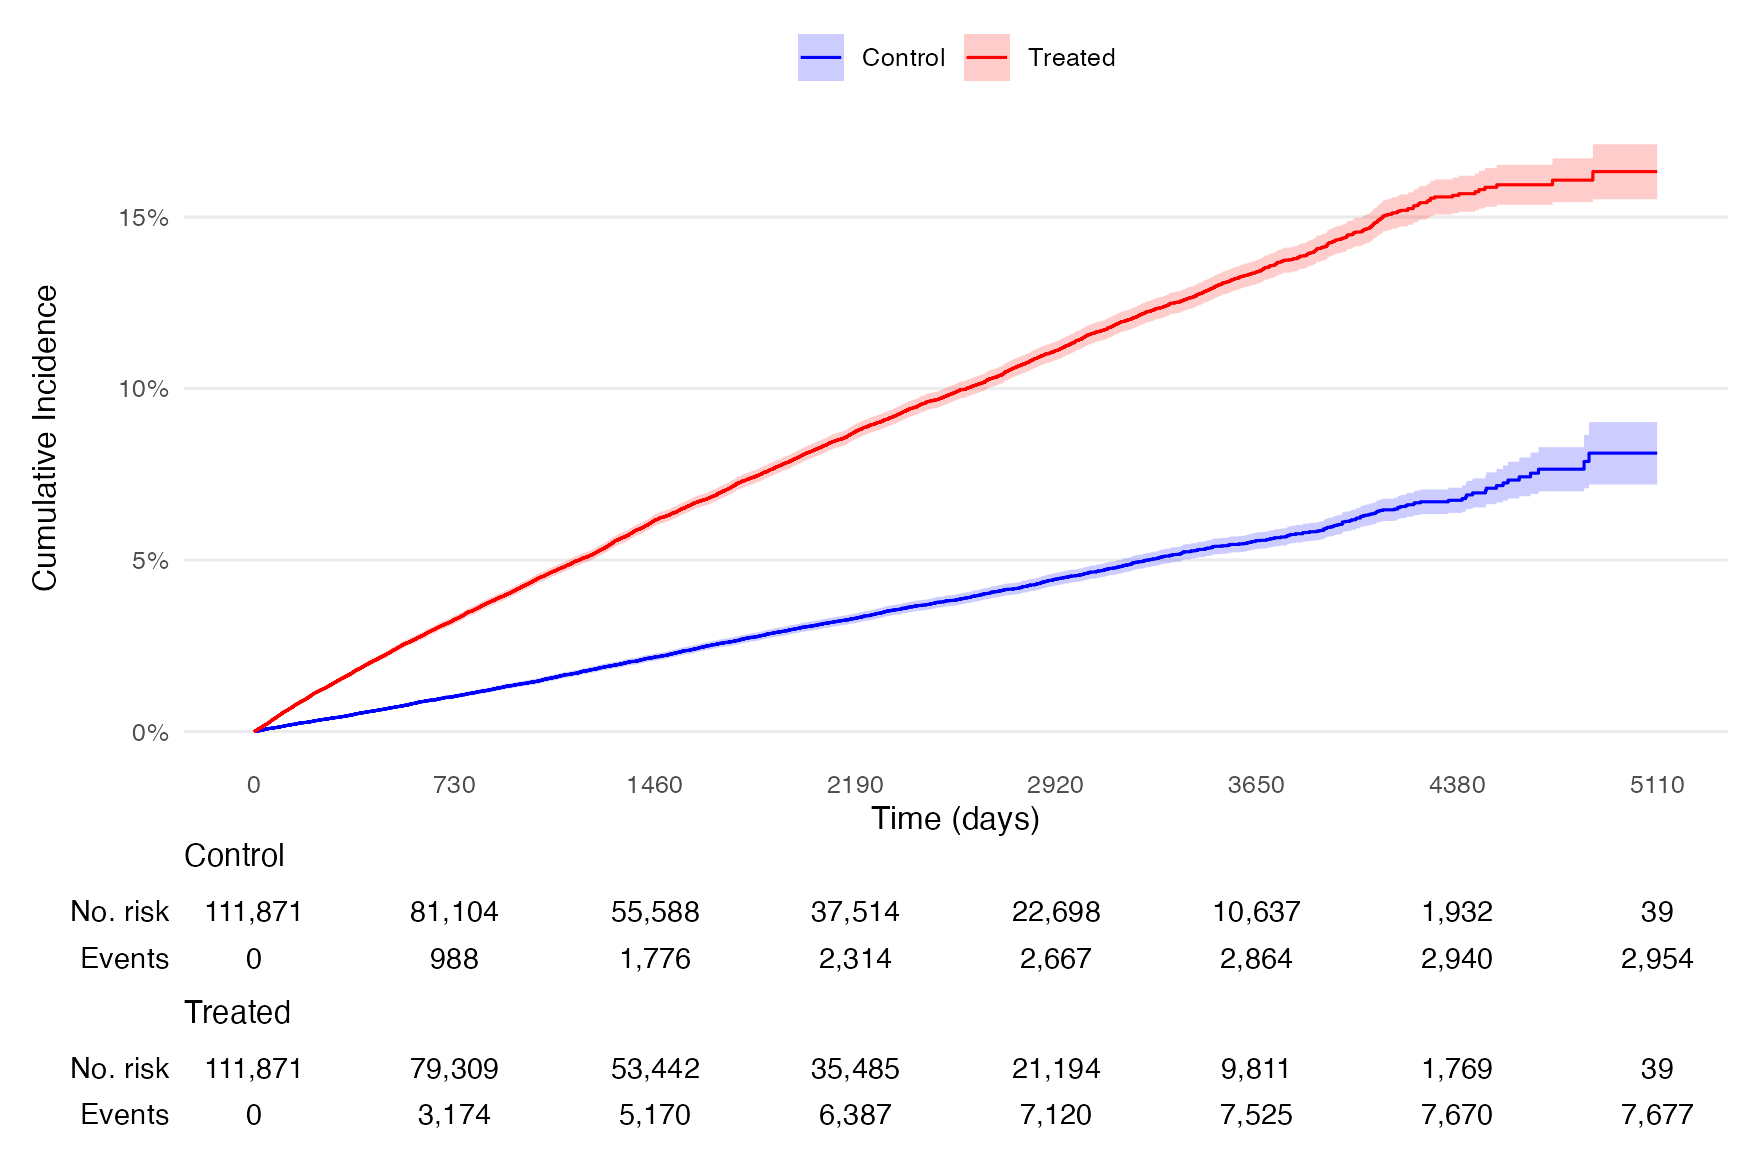


# Supplementary Figure 2. Cumulative incidence curve of all-cause mortality in the treated tuberculosis cases and the unexposed control group. Shaded areas indicate the 95% confidence intervals.


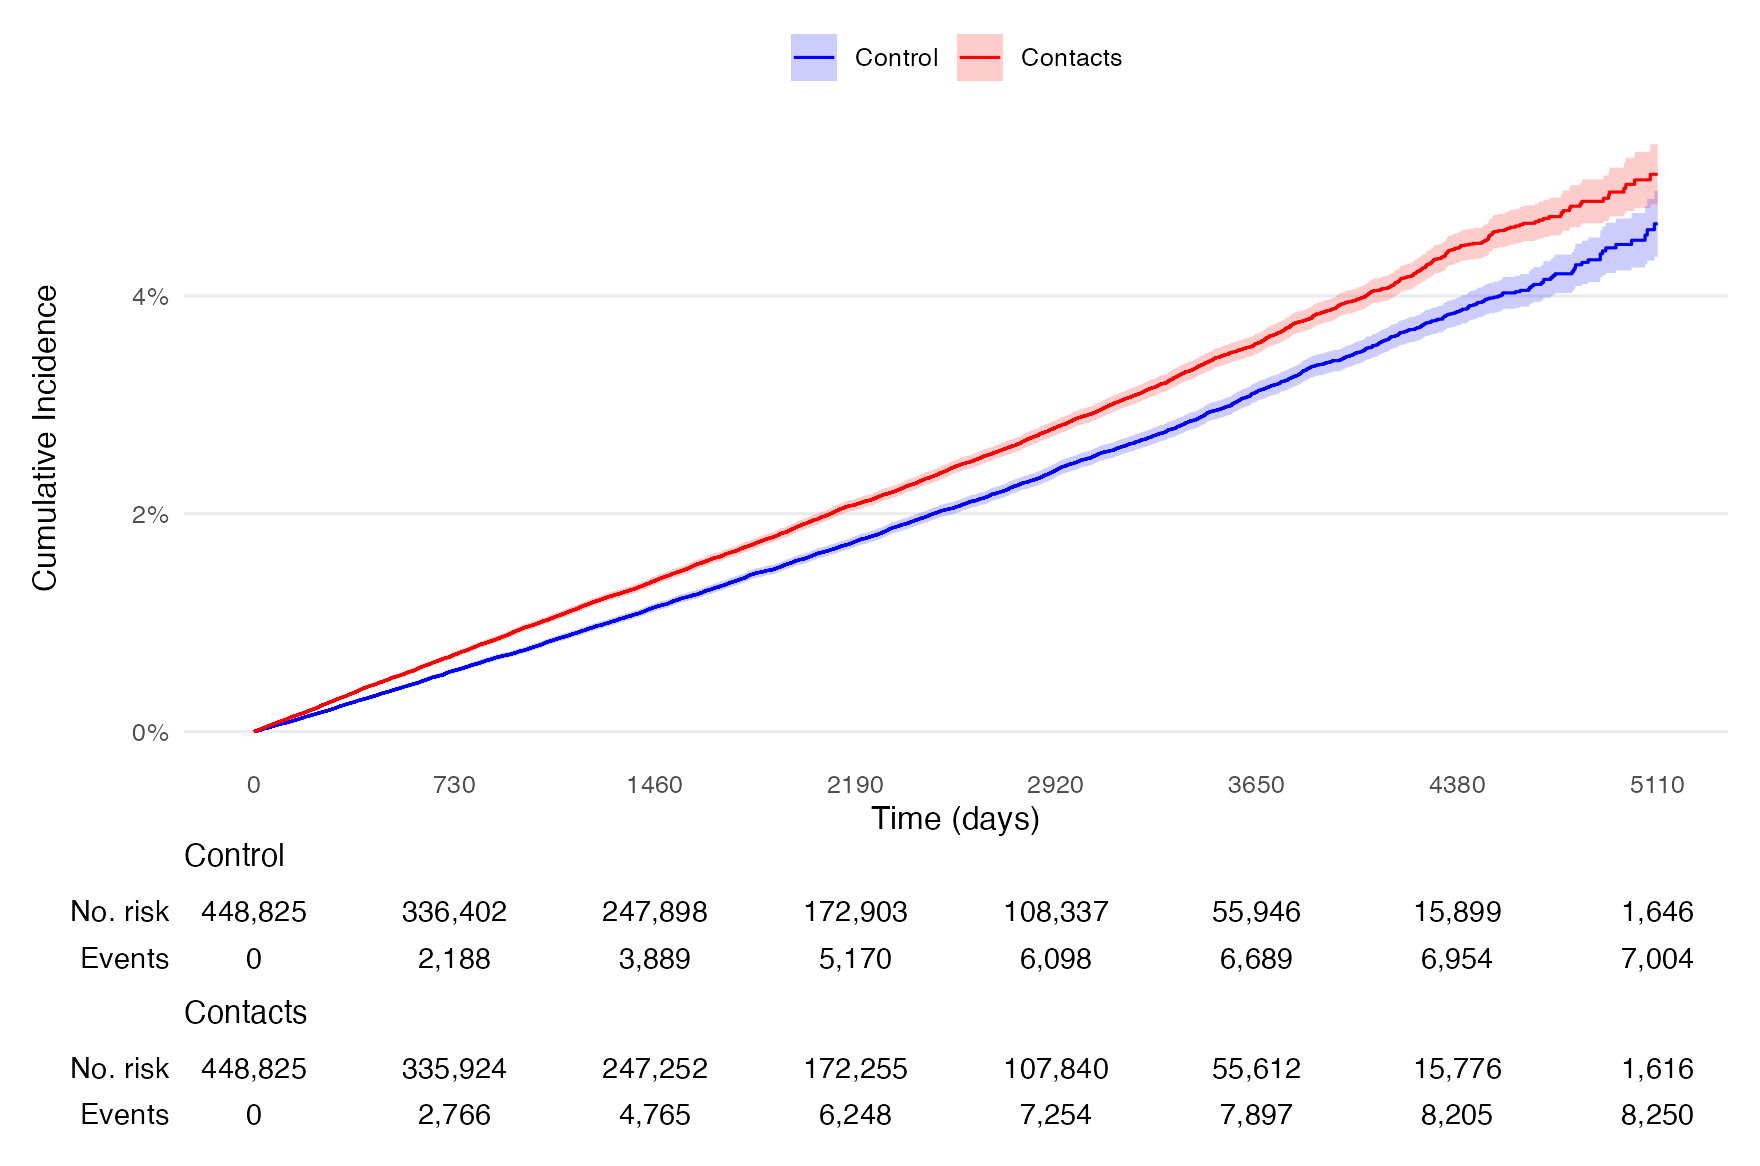


# Supplementary Figure 3. Cumulative incidence curve of all-cause mortality in the household tuberculosis case contacts and the unexposed control group. Shaded areas indicate the 95% confidence intervals.
